# Supplementary material for: High social status males experience accelerated epigenetic aging in wild baboons
Source: eLife journal article supplement (doi:10.7554/elife.66128), 2021-04-05
Supplement: supp [file elife-66128-supp-v1.zip]

Archive with 15 entries (15 files):
- elife_poa_e66128_Figure_1_figure_supplement_1.pdf
- elife_poa_e66128_Figure_1_figure_supplement_2.pdf
- elife_poa_e66128_Figure_1_figure_supplement_3.pdf
- elife_poa_e66128_Figure_1_figure_supplement_4.png
- elife_poa_e66128_Figure_1_figure_supplement_5.pdf
- elife_poa_e66128_Figure_2_figure_supplement_1.pdf
- elife_poa_e66128_Figure_2_figure_supplement_2.png
- elife_poa_e66128_Figure_2_figure_supplement_3.pdf
- elife_poa_e66128_Figure_2_figure_supplement_4.png
- elife_poa_e66128_Transparent_Reporting_File.docx
- elife_poa_e66128_Supplementary_file_1.xlsx
- elife_poa_e66128_Supplementary_file_2.xlsx
- elife_poa_e66128_Supplementary_file_3.xlsx
- elife_poa_e66128_Supplementary_file_4.xlsx
- elife_poa_e66128_Supplementary_file_5.xlsx
