# Supplementary material for: High social status males experience accelerated epigenetic aging in wild baboons
Source: eLife journal article supplement (doi:10.7554/elife.66128), 2021-04-05
Supplement: supp [file elife-66128-supp-v1.zip › elife_poa_e66128_Figure_1_figure_supplement_5.pdf]

## Females

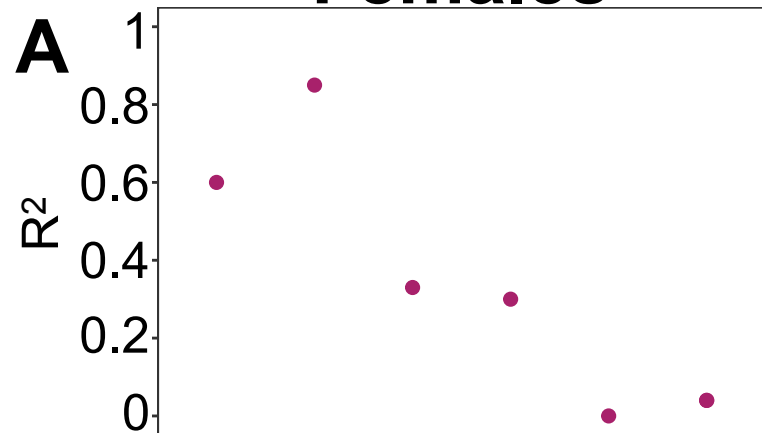

## Males

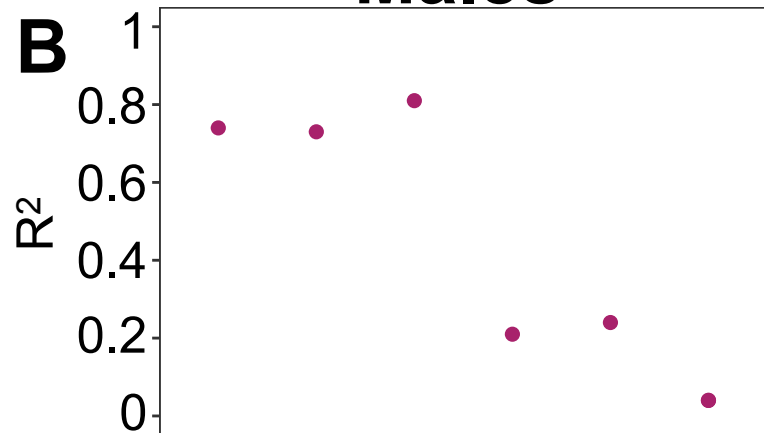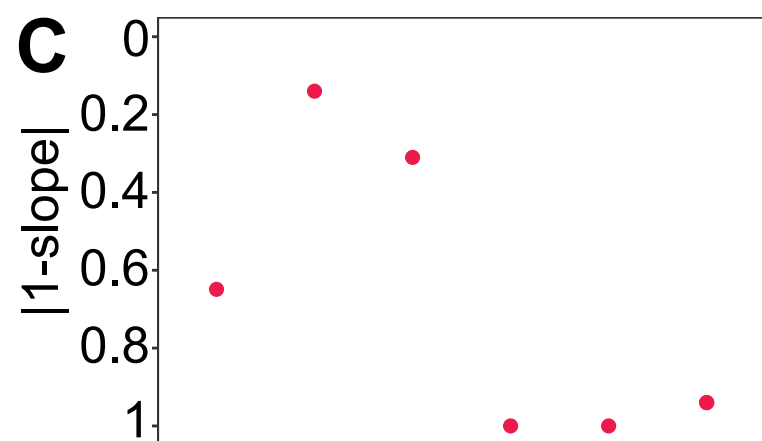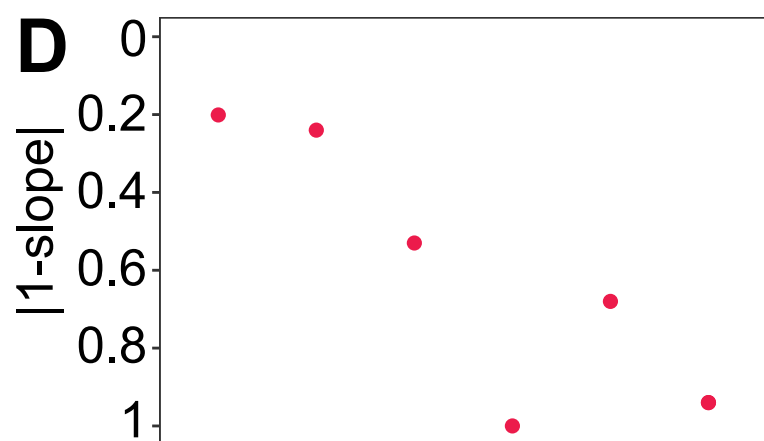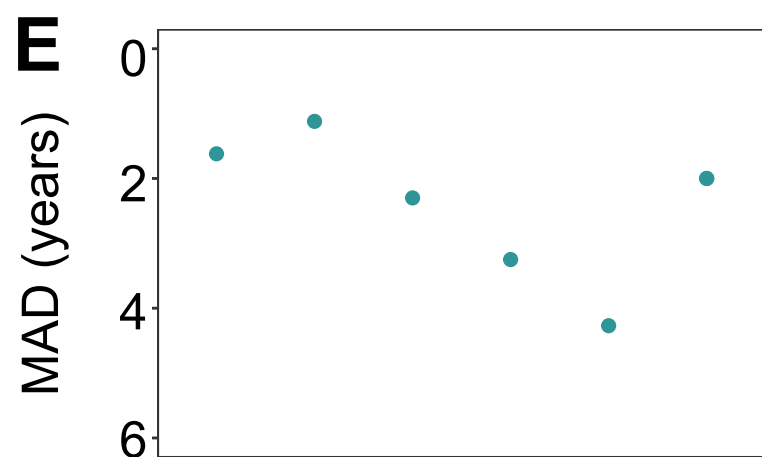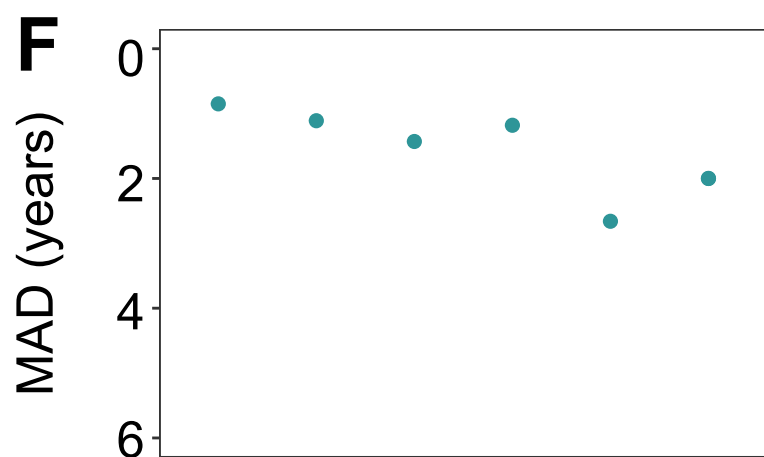

Epigenetic clock  
Dentine exposure  
BMI, youthful  
BMI, aged  
Flow cytometry  
Blood smear

Epigenetic clock  
Dentine exposure  
BMI, youthful  
BMI, aged  
Flow cytometry  
Blood smear
