# Supplementary material for: High social status males experience accelerated epigenetic aging in wild baboons
Source: eLife journal article supplement (doi:10.7554/elife.66128), 2021-04-05
Supplement: supp [file elife-66128-supp-v1.zip › elife_poa_e66128_Supplementary_file_1.xlsx]

## Sheet: Supplementary Table 1
SRA sample ID	SRA number	Sequencing Platform	Age (years)	Accuracy of birth date	Ordinal rank	Sex	Body Mass Index (kg/m2)	Age-adjusted BMI	Cumulative Early Adversity Score	Dyadic Social Connectedness (F to F)	Depth (millions of reads sequenced)	Bisulfite conversion rate	Predicted epigenetic age (years) from n=277 model	Predicted epigenetic age (years) from n=286 model
AMB_70	PRJNA648767	HiSeq 4000	7.7426	Within < 1 week	2	F	NA	NA	2	1.87446	11.8823	0.998103	7.01262	7.1469
AMB_71	PRJNA648767	HiSeq 4000	6.3354	Within < 1 week	11	M	36.6975	-3.48817	1	NA	13.4106	0.998281	5.72367	5.70612
AMB_72	PRJNA648767	HiSeq 4000	4.2409	Within < 1 week	3	F	32.274	1.27962	1	1.28712	14.9442	0.996624	5.81556	6.09922
AMB_51	SRP058411	HiSeq 2000	4.9144	Within < 1 week	28	F	34.0688	0.76523	2	0.470392	13.9621	0.998864	4.7497	4.35351
AMB_73	PRJNA648767	HiSeq 4000	6.5188	Within < 1 week	14	M	38.3893	-2.64243	3	NA	17.1824	0.998653	4.96191	4.74837
AMB_74	PRJNA648767	HiSeq 4000	4.8433	Within < 1 week	6	F	29.8134	-3.24607	2	NA	13.7885	0.999251	6.05889	6.34827
AMB_75	PRJNA648767	HiSeq 4000	7.9562	Within < 1 week	8	F	34.5924	-0.889073	0	1.24113	9.36605	0.998118	8.94982	8.48998
AMB_76	PRJNA648767	HiSeq 4000	5.4237	Within < 1 week	9	F	NA	NA	1	0.280279	17.2647	0.99791	6.92669	6.78506
AMB_77	PRJNA648767	HiSeq 4000	7.7563	Within < 1 week	18	M	46.1868	-0.552639	0	NA	16.8146	0.998007	7.55777	6.9444
AMB_78	PRJNA648767	HiSeq 4000	7.4031	Within < 1 week	15	M	49.2919	4.18142	0	NA	17.8151	0.997939	7.75819	7.59943
AMB_54	SRP058411	HiSeq 2000	4.1342	Within < 1 week	NA	F	28.8361	-1.79212	2	NA	16.5487	0.996364	5.63451	5.84132
AMB_79	PRJNA648767	HiSeq 4000	9.2539	Within < 1 week	1	M	49.7052	2.77655	1	NA	12.4205	0.997952	10.8137	10.6131
AMB_80	PRJNA648767	HiSeq 4000	13.2676	Within < 1 week	5	F	40.5644	4.68548	2	NA	18.2805	0.997851	8.81592	9.32168
AMB_81	PRJNA648767	HiSeq 4000	10.5517	Within < 1 week	1	F	42.4408	6.76507	1	0.413557	13.6199	0.998543	6.47737	6.71433
AMB_82	PRJNA648767	HiSeq 4000	8.1506	Within < 1 week	11	M	41.8384	-5.21977	0	NA	40.6922	0.995104	6.23115	6.72427
AMB_83	PRJNA648767	HiSeq 4000	9.8398	Within < 1 week	2	M	NA	NA	1	NA	13.9259	0.999213	8.7717	8.79304
AMB_55	SRP058411	HiSeq 2000	7.4251	Within < 1 week	2	M	49.0901	3.87862	2	NA	17.7267	0.982762	8.4034	7.55349
AMB_03	SRP058411	HiSeq 2000	7.6632	Within < 1 week	6	M	38.7059	-7.60418	1	NA	31.7187	0.981712	8.75026	9.26643
AMB_84	PRJNA648767	HiSeq 4000	5.7796	Within < 1 week	5	F	NA	NA	1	0.814238	12.9161	0.997916	8.47145	8.63036
AMB_85	PRJNA648767	HiSeq 4000	6.0397	Within < 1 week	16	M	36.9	-1.92188	2	NA	15.9557	0.996809	5.48686	5.6323
AMB_86	PRJNA648767	HiSeq 4000	6.3436	Within < 1 week	16	F	NA	NA	2	0.91329	9.99628	0.999226	7.1408	6.94369
AMB_87	PRJNA648767	HiSeq 4000	5.7276	Within < 1 week	33	F	40.2473	4.93254	3	-0.429577	21.26	0.999245	8.04366	7.87213
AMB_88	PRJNA648767	HiSeq 4000	8.7064	Within < 1 week	6	M	43.4773	-3.51567	2	NA	47.9354	0.99493	7.68643	8.45264
AMB_89	PRJNA648767	HiSeq 4000	5.2895	Within < 1 week	NA	F	31.8342	-2.75539	1	NA	12.5148	0.998139	6.78538	7.07716
AMB_90	PRJNA648767	HiSeq 4000	11.948	Within < 1 week	NA	F	NA	NA	1	NA	10.0917	0.998004	8.36017	9.11622
AMB_56	SRP058411	HiSeq 2000	9.1855	Within < 1 week	1	M	49.2527	2.31596	1	NA	15.5494	0.983101	8.96272	9.67722
AMB_91	PRJNA648767	HiSeq 4000	10.4285	Within < 1 week	1	F	NA	NA	1	0.659882	13.6255	0.998106	9.21267	9.17608
AMB_57	SRP058411	HiSeq 2000	5.9439	Within < 1 week	3	F	35.5909	0.259962	0	1.65506	10.093	0.999521	6.48777	6.94531
AMB_92	PRJNA648767	HiSeq 4000	9.2895	Within < 1 week	13	F	36.2486	0.667335	0	0.315053	22.2954	0.998657	8.81142	9.00107
AMB_93	PRJNA648767	HiSeq 4000	6.7461	Within < 1 week	6	F	33.1411	-2.24983	0	1.09817	18.184	0.998607	9.32358	9.01679
AMB_94	PRJNA648767	HiSeq 4000	6.5818	Within < 1 week	16	F	38.629	3.25028	3	0.996524	19.6701	0.999209	7.98617	7.78388
AMB_06	SRP058411	HiSeq 2000	6.3847	Within < 1 week	NA	M	40.8274	0.414453	1	NA	28.6393	0.982313	5.80955	5.47707
AMB_95	PRJNA648767	HiSeq 4000	7.4908	Within < 1 week	6	M	45.1307	-0.383898	0	NA	14.2528	0.998047	9.4808	9.17053
AMB_96	PRJNA648767	HiSeq 4000	15.154	Within < 1 week	NA	F	36.359	0.339025	0	NA	14.9676	0.998104	10.6104	10.6014
AMB_97	PRJNA648767	HiSeq 4000	5.8727	Within < 1 week	14	F	36.5406	1.21495	0	0.560902	21.309	0.995112	7.09579	6.81063
AMB_98	PRJNA648767	HiSeq 4000	5.7632	Within < 1 week	8	M	37.8103	0.263866	0	NA	11.2941	0.999276	6.53611	6.70206
AMB_99	PRJNA648767	HiSeq 4000	6.0151	Within < 1 week	5	F	31.9596	-3.37672	NA	1.65102	14.4404	0.998108	7.50936	7.61765
AMB_100	PRJNA648767	HiSeq 4000	4.5394	Within < 1 week	9	F	NA	NA	0	1.19943	15.9545	0.997946	6.15747	6.13551
AMB_101	PRJNA648767	HiSeq 4000	7.0007	Within < 1 week	11	F	32.5456	-2.86441	0	0.458474	14.3324	0.998229	5.77498	5.16794
AMB_102	PRJNA648767	HiSeq 4000	6.8446	Within < 1 week	16	M	42.3036	-0.230875	3	NA	8.77993	0.998075	7.84017	7.57451
AMB_102_B	PRJNA648767	HiSeq 4000	11.5702	Within < 1 week	10	M	48.0063	1.34939	3	NA	20.5955	0.99842	14.7461	14.7485
AMB_103	PRJNA648767	HiSeq 4000	5.3279	Within < 1 week	NA	F	NA	NA	3	NA	9.85886	0.99799	8.19348	7.79647
AMB_08	SRP058411	HiSeq 2000	7.9179	Within < 1 week	NA	M	48.8369	1.75152	2	NA	43.3335	0.998262	7.7928	8.36264
AMB_104	PRJNA648767	HiSeq 4000	8.9774	Within < 1 week	3	M	44.634	-2.32713	3	NA	13.6189	0.997834	8.02749	7.93693
AMB_105	PRJNA648767	HiSeq 4000	5.8261	Within 3 months	NA	F	NA	NA	NA	NA	5.57522	0.998298	8.26613	8.27353
AMB_106	PRJNA648767	HiSeq 4000	7.1896	Within < 1 week	17	M	41.7969	-2.32859	1	NA	11.3497	0.996712	8.24409	8.45859
AMB_107	PRJNA648767	HiSeq 4000	6.5927	Within < 1 week	18	M	42.7303	1.35761	2	NA	18.9967	0.998155	6.3953	6.84899
AMB_108	PRJNA648767	HiSeq 4000	7.6851	Within < 1 week	17	M	NA	NA	1	NA	15.9232	0.996868	7.79101	8.08085
AMB_109	PRJNA648767	HiSeq 4000	4.6817	Within < 1 week	34	F	34.749	2.24333	2	NA	15.1409	0.999171	5.78292	6.16272
AMB_110	PRJNA648767	HiSeq 4000	5.1608	Within < 1 week	NA	M	32.4639	-2.30447	1	NA	7.76368	0.998019	7.0962	7.31306
AMB_111	PRJNA648767	HiSeq 4000	6.3025	Within < 1 week	NA	F	34.9241	-0.433661	2	NA	12.0688	0.997966	7.36618	7.05164
AMB_112	PRJNA648767	HiSeq 4000	6.59	Within < 1 week	14	M	39.0348	-2.32522	0	NA	13.886	0.997937	6.64842	6.7611
AMB_113	PRJNA648767	HiSeq 4000	9.4374	Within < 1 week	2	M	46.9025	-0.00461599	3	NA	9.92885	0.998127	10.1295	9.77044
AMB_114	PRJNA648767	HiSeq 4000	14.4668	Within < 1 week	18	M	38.4684	-7.84878	0	NA	20.7186	0.998213	12.6489	13.4504
AMB_115	PRJNA648767	HiSeq 4000	7.1075	Within < 1 week	25	F	35.8737	0.455703	1	0.843939	7.49927	0.998367	8.66865	8.20856
AMB_115_B	PRJNA648767	HiSeq 4000	11.3676	Within < 1 week	25	F	NA	NA	1	0.37338	25.933	0.99692	10.0497	10.0358
AMB_116	PRJNA648767	HiSeq 4000	8.4134	Within < 1 week	NA	F	NA	NA	2	NA	18.1913	0.998043	6.94261	6.95923
AMB_117	PRJNA648767	HiSeq 4000	6.9076	Within < 1 week	NA	F	33.2937	-2.1094	1	NA	6.55099	0.998241	6.83841	7.16438
AMB_118	PRJNA648767	HiSeq 4000	5.0075	Within < 1 week	11	F	32.6336	-0.989102	3	-0.828906	12.4799	0.99935	6.14505	6.23656
AMB_119	PRJNA648767	HiSeq 4000	5.7933	Within < 1 week	10	F	NA	NA	3	1.34252	28.7771	0.995132	10.3011	10.2092
AMB_120	PRJNA648767	HiSeq 4000	13.8617	Within < 1 week	9	M	51.6019	5.21381	NA	NA	20.2892	0.997919	8.77341	8.77477
AMB_121	PRJNA648767	HiSeq 4000	6.1629	Within < 1 week	16	F	NA	NA	0	1.27662	19.7498	0.997852	7.23988	7.07789
AMB_122	PRJNA648767	HiSeq 4000	9.1663	Within < 1 week	17	F	36.2318	0.659786	0	0.556477	14.8455	0.998119	7.69221	7.78776
AMB_122_B	PRJNA648767	HiSeq 4000	18.0479	Within < 1 week	21	F	37.5119	1.27534	0	0.905151	7.5692	0.999326	10.642	11.6764
AMB_58	SRP058411	HiSeq 2000	7.7235	Within < 1 week	21	F	35.7846	0.320468	1	1.3725	34.1177	0.996598	8.56918	8.70365
AMB_123	PRJNA648767	HiSeq 4000	4.1232	Within < 1 week	NA	F	31.2415	0.650767	1	NA	16.9977	0.998038	4.31925	4.76607
AMB_124	PRJNA648767	HiSeq 4000	10.8446	Within < 1 week	23	F	33.1108	-2.58679	1	1.23904	13.7481	0.99814	9.14767	9.59612
AMB_125	PRJNA648767	HiSeq 4000	7.7919	Within < 1 week	21	F	35.6406	0.171372	2	0.534694	10.1896	0.998088	8.90688	8.98217
AMB_10	SRP058411	HiSeq 2000	6.2423	Within < 1 week	NA	M	39.1848	-0.571539	3	NA	43.5564	0.980939	6.29157	6.56675
AMB_13	SRP058411	HiSeq 2000	6.0096	Within < 1 week	NA	M	34.7115	-3.97151	2	NA	30.2129	0.98116	7.2266	7.82973
AMB_59	SRP058411	HiSeq 2000	5.4401	Within < 1 week	NA	M	37.0158	0.959414	3	NA	11.8855	0.998832	7.13749	7.26383
AMB_126	PRJNA648767	HiSeq 4000	12.4627	Within < 1 week	NA	F	NA	NA	0	NA	14.1118	0.997833	10.7174	11.3165
AMB_126_B	PRJNA648767	HiSeq 4000	26.3436	Within < 1 week	15	F	30.4012	-6.45597	0	1.46954	13.3937	0.99835	13.1064	13.2929
AMB_127	PRJNA648767	HiSeq 4000	10.4613	Within < 1 week	10	F	40.2638	4.59487	0	0.674063	30.7413	0.998056	11.7274	11.1396
AMB_127_B	PRJNA648767	HiSeq 4000	22.3819	Within < 1 week	25	F	35.9281	-0.632693	0	1.84232	13.339	0.998263	13.4062	13.8226
AMB_18	SRP058411	HiSeq 2000	15.781	Within < 1 week	NA	M	48.7498	2.5868	2	NA	47.6364	0.998438	16.9016	17.5705
AMB_128	PRJNA648767	HiSeq 4000	3.1567	Within < 1 week	NA	F	28.5658	1.28866	2	NA	19.971	0.997835	2.85167	3.2547
AMB_60	SRP058411	HiSeq 2000	6.2587	Within < 1 week	20	M	40.0744	0.24228	1	NA	38.9291	0.998471	4.98485	5.3201
AMB_19	SRP058411	HiSeq 2000	3.039	Within < 1 week	20	M	26.6869	1.70496	0	NA	40.7499	0.998462	3.52466	3.12348
AMB_129	PRJNA648767	HiSeq 4000	5.2841	Within < 1 week	21	F	NA	NA	2	NA	14.488	0.997898	5.81248	6.15782
AMB_130	PRJNA648767	HiSeq 4000	5.3251	Within < 1 week	22	F	32.9585	-1.75305	3	NA	8.00884	0.99825	8.15669	7.64951
AMB_20	SRP058411	HiSeq 2000	4.501	Within < 1 week	18	M	31.0086	-0.716523	0	NA	38.309	0.998428	4.26653	4.0526
AMB_131	PRJNA648767	HiSeq 4000	11.7536	Within < 1 week	24	F	39.1687	3.40312	0	1.5512	17.1096	0.998272	12.3149	12.0068
AMB_132	PRJNA648767	HiSeq 4000	6.8611	Within < 1 week	NA	M	48.8997	6.28955	2	NA	13.9293	0.998044	6.09272	6.07817
AMB_133	PRJNA648767	HiSeq 4000	7.2471	Within < 1 week	3	M	51.4054	7.01471	1	NA	30.0966	0.998375	10.2871	10.133
AMB_133_B	PRJNA648767	HiSeq 4000	12.564	Within < 1 week	4	M	NA	NA	1	NA	12.7137	0.996796	12.2119	12.1338
AMB_133_C	PRJNA648767	HiSeq 4000	15.5893	Within < 1 week	14	M	52.999	6.81357	1	NA	9.29484	0.998019	14.3064	14.1401
AMB_134	PRJNA648767	HiSeq 2000	3.833	Within < 1 week	12	M	29.032	0.388006	2	NA	21.465	0.998457	7.75167	7.75225
AMB_135	PRJNA648767	HiSeq 4000	6.9295	Within < 1 week	10	M	40.7084	-2.21749	1	NA	18.0259	0.997943	8.45182	8.21432
AMB_136	PRJNA648767	HiSeq 4000	5.3169	Within < 1 week	13	M	34.598	-0.890123	0	NA	38.2357	0.997872	6.55586	6.74333
AMB_137	PRJNA648767	HiSeq 4000	7.4333	Within < 1 week	8	F	34.4537	-0.988669	0	1.21837	14.2208	0.999365	7.26463	7.32985
AMB_21	SRP058411	HiSeq 2000	6.705	Within < 1 week	8	F	32.4499	-2.93798	0	1.2723	28.7353	0.999529	6.722	6.266
AMB_138	PRJNA648767	HiSeq 4000	11.5948	Within < 1 week	NA	M	43.896	-2.75809	2	NA	11.6638	0.998147	10.6977	10.6016
AMB_138_B	PRJNA648767	HiSeq 4000	17.2211	Within < 1 week	6	M	NA	NA	2	NA	11.1798	0.999292	16.403	16.6933
AMB_139	PRJNA648767	HiSeq 4000	4.6461	Within < 1 week	NA	F	30.298	-2.08564	1	NA	19.1132	0.997901	6.49136	6.3109
AMB_140	PRJNA648767	HiSeq 4000	8.9172	Within < 1 week	NA	M	42.6456	-4.32255	3	NA	17.5483	0.998172	8.49745	8.25754
AMB_141	PRJNA648767	HiSeq 4000	8.3723	Within < 1 week	3	M	49.8454	2.81327	1	NA	14.7744	0.998146	8.92017	8.60972
AMB_141_B	PRJNA648767	HiSeq 4000	12.6489	Within < 1 week	NA	M	51.113	4.58264	1	NA	21.7202	0.997898	10.2946	10.3728
AMB_142	PRJNA648767	HiSeq 4000	10.0972	Within < 1 week	2	M	41.7157	-5.11405	0	NA	10.5531	0.998199	9.38581	9.64394
AMB_143	PRJNA648767	HiSeq 4000	9.5633	Within < 1 week	1	M	NA	NA	2	NA	7.95606	0.999359	10.5783	10.2485
AMB_22	SRP058411	HiSeq 2000	5.2238	Within < 1 week	NA	F	NA	NA	1	NA	16.8891	0.999413	7.62813	7.21126
AMB_144	PRJNA648767	HiSeq 4000	15.7207	Within < 1 week	16	M	41.9865	-4.1835	1	NA	14.562	0.998023	10.576	10.8442
AMB_145	PRJNA648767	HiSeq 4000	12.9637	Within < 1 week	NA	F	NA	NA	1	NA	13.7816	0.997968	10.2546	10.7637
AMB_146	PRJNA648767	HiSeq 4000	6.8008	Within < 1 week	7	F	37.1078	1.71276	1	NA	6.31392	0.998239	9.00504	8.79374
AMB_147	PRJNA648767	HiSeq 4000	7.2416	Within < 1 week	NA	F	35.9134	0.485342	2	NA	13.2704	0.99798	9.12607	9.28259
AMB_148	PRJNA648767	HiSeq 4000	9.744	Within < 1 week	17	F	35.2824	-0.332912	1	1.26227	14.4388	0.998424	7.64439	8.01939
AMB_149	PRJNA648767	HiSeq 4000	7.3977	Within < 1 week	1	M	48.498	3.41276	0	NA	14.7342	0.997939	9.9215	10.2136
AMB_150	PRJNA648767	HiSeq 4000	4.6379	Within < 1 week	9	F	31.0916	-1.2639	0	-0.332018	10.2682	0.997997	5.43499	5.885
AMB_150_B	PRJNA648767	HiSeq 4000	12.7693	Within < 1 week	17	F	37.6802	1.83859	0	0.543025	10.3397	0.998293	10.5501	10.2272
AMB_151	PRJNA648767	HiSeq 4000	4.5749	Within < 1 week	17	F	NA	NA	2	NA	8.7033	0.998267	7.51686	7.75399
AMB_152	PRJNA648767	HiSeq 4000	12.5202	Within < 1 week	4	M	NA	NA	3	NA	22.7309	0.997929	12.2115	12.221
AMB_152_C	PRJNA648767	HiSeq 4000	16.7995	Within < 1 week	11	M	41.7732	-4.27025	3	NA	18.431	0.997986	11.9674	12.942
AMB_153	PRJNA648767	HiSeq 4000	8.2053	Within < 1 week	3	M	45.5672	-1.48454	0	NA	11.628	0.998135	7.44088	7.57893
AMB_153_B	PRJNA648767	HiSeq 4000	10.6366	Within < 1 week	4	M	46.4025	-0.363992	0	NA	16.8537	0.997973	8.88864	9.02096
AMB_154	PRJNA648767	HiSeq 4000	6.5845	Within < 1 week	16	F	32.2793	-3.09959	1	0.880322	18.5854	0.997824	8.53421	8.26327
AMB_154_B	PRJNA648767	HiSeq 4000	10.6283	Within < 1 week	15	F	34.674	-1.00746	1	1.47195	16.4406	0.998343	9.6616	9.36991
AMB_155	PRJNA648767	HiSeq 4000	7.2526	Within < 1 week	20	M	44.2153	-0.200643	1	NA	14.0763	0.997863	6.71513	6.78242
AMB_155_B	PRJNA648767	HiSeq 4000	11.9507	Within < 1 week	3	M	49.3267	2.71443	1	NA	19.435	0.99815	11.1619	11.1849
AMB_23	SRP058411	HiSeq 2000	9.7851	Within < 1 week	12	M	45.0029	-1.86343	0	NA	15.4638	0.998045	8.89838	9.13537
AMB_156	PRJNA648767	HiSeq 4000	5.6099	Within < 1 week	32	F	37.591	2.28506	2	NA	14.0981	0.997974	7.52027	7.53886
AMB_157	PRJNA648767	HiSeq 4000	9.5496	Within < 1 week	4	M	NA	NA	0	NA	31.3152	0.998176	9.43155	9.68563
AMB_61	SRP058411	HiSeq 2000	2.5873	Within < 1 week	22	M	25.9483	3.04999	1	NA	29.2491	0.998222	5.17353	4.93895
AMB_158	PRJNA648767	HiSeq 4000	19.6304	Within < 1 week	29	F	35.669	-0.685939	1	0.538924	5.13765	0.998	11.3334	12.3131
AMB_158_B	PRJNA648767	HiSeq 4000	21.8864	Within < 1 week	28	F	35.4413	-1.08238	1	0.867016	10.4787	0.999375	10.7416	11.4391
AMB_159	PRJNA648767	HiSeq 4000	9.3388	Within < 1 week	2	M	48.9376	2.01887	2	NA	22.6426	0.998175	11.5984	11.7168
AMB_159_B	PRJNA648767	HiSeq 4000	13.4018	Within < 1 week	4	M	43.2584	-3.18369	2	NA	22.3154	0.998048	11.9472	12.0066
AMB_160	PRJNA648767	HiSeq 4000	6.9487	Within < 1 week	NA	M	42.6008	-0.413459	3	NA	19.1057	0.998092	5.47738	5.64222
AMB_161	PRJNA648767	HiSeq 4000	6.2204	Within < 1 week	15	M	35.2663	-4.389	0	NA	18.3158	0.998064	6.34595	6.29691
AMB_162	PRJNA648767	HiSeq 4000	5.5907	Within < 1 week	17	F	32.6642	-2.64036	2	1.5699	17.6629	0.998164	7.38595	7.31449
AMB_163	PRJNA648767	HiSeq 4000	6.6858	Within < 1 week	34	F	34.0648	-1.32172	3	0.209924	20.3459	0.997985	9.80856	9.70719
AMB_164	PRJNA648767	HiSeq 4000	6.4778	Within < 1 week	NA	M	43.31	2.46771	2	NA	21.6402	0.997956	6.58327	6.73266
AMB_165	PRJNA648767	HiSeq 4000	4.2163	Within < 1 week	17	F	NA	NA	2	0.540422	9.49555	0.998341	8.49094	8.62765
AMB_166	PRJNA648767	HiSeq 4000	5.5332	Within < 1 week	28	F	36.7474	1.44716	1	0.749629	19.1339	0.998157	6.66411	6.55146
AMB_167	PRJNA648767	HiSeq 4000	6.7132	Within < 1 week	12	M	38.1277	-3.80064	1	NA	15.6607	0.998012	7.08439	7.4436
AMB_25	SRP058411	HiSeq 2000	5.9986	Within < 1 week	11	M	37.3614	-1.27111	1	NA	94.2089	0.998	5.18928	4.9136
AMB_27	SRP058411	HiSeq 2000	5.9795	Within < 1 week	12	M	40.275	1.73092	1	NA	41.2283	0.998205	5.49182	5.66371
AMB_170	PRJNA648767	HiSeq 4000	6.0424	Within < 1 week	8	F	NA	NA	1	1.08794	15.6299	0.997994	7.95021	8.05345
AMB_171	PRJNA648767	HiSeq 4000	5.5934	Within < 1 week	10	F	NA	NA	1	0.901235	19.5236	0.998271	7.52997	7.3401
AMB_172	PRJNA648767	HiSeq 4000	8.7885	Within < 1 week	4	M	50.3123	3.32902	1	NA	8.45295	0.998411	10.4296	11.0647
AMB_173	PRJNA648767	HiSeq 4000	3.948	Within < 1 week	19	M	31.0357	1.86143	0	NA	7.70553	0.997998	4.16564	4.33454
AMB_174	PRJNA648767	HiSeq 4000	5.8453	Within < 1 week	10	F	NA	NA	2	0.768349	15.274	0.998091	6.47238	6.22195
AMB_175	PRJNA648767	HiSeq 4000	8.0548	Within < 1 week	1	M	41.9112	-5.15814	1	NA	11.3206	0.999338	11.1373	11.0175
AMB_176	PRJNA648767	HiSeq 4000	8.0164	Within < 1 week	NA	M	46.1855	-0.888359	1	NA	30.9966	0.997894	8.12432	8.02756
AMB_177	PRJNA648767	HiSeq 4000	8.8077	Within < 1 week	2	M	41.9998	-4.98126	1	NA	18.41	0.99932	9.23304	9.16053
AMB_178	PRJNA648767	HiSeq 4000	11.9699	Within < 1 week	NA	M	51.7883	5.17829	1	NA	14.7242	0.998194	11.0972	11.219
AMB_28	SRP058411	HiSeq 2000	8.2875	Within < 1 week	3	M	45.3992	-1.64283	2	NA	46.1814	0.996764	8.40395	8.88909
AMB_179	PRJNA648767	HiSeq 4000	2.5352	Within < 1 week	NA	F	23.7448	-1.40145	0	NA	11.675	0.997914	5.45703	5.46763
AMB_180	PRJNA648767	HiSeq 4000	8.4435	Within < 1 week	10	F	34.319	-1.19895	0	1.32503	14.3278	0.997936	8.81703	8.89473
AMB_180_B	PRJNA648767	HiSeq 4000	11.0062	Within < 1 week	9	F	35.5772	-0.132454	0	0.629084	12.2545	0.997986	10.0154	9.89786
AMB_180_C	PRJNA648767	HiSeq 4000	17.4018	Within < 1 week	6	F	37.0552	0.866975	0	-0.576055	11.2943	0.99818	10.497	11.0976
AMB_181	PRJNA648767	HiSeq 4000	5.3744	Within < 1 week	NA	F	NA	NA	0	NA	5.67151	0.998345	7.7008	7.57762
AMB_182	PRJNA648767	HiSeq 4000	9.243	Within < 1 week	NA	M	49.3716	2.44161	0	NA	10.8514	0.998055	8.73099	9.11217
AMB_183	PRJNA648767	HiSeq 4000	15.8193	Within < 1 week	7	F	40.3558	4.28604	0	1.15194	15.1508	0.999293	11.3411	12.0707
AMB_184	PRJNA648767	HiSeq 4000	5.6893	Within < 1 week	NA	F	NA	NA	1	NA	12.0397	0.997998	7.43607	7.21558
AMB_185	PRJNA648767	HiSeq 4000	9.5962	Within < 1 week	10	M	52.1799	5.29138	1	NA	15.1251	0.99828	8.78964	8.98859
AMB_185_B	PRJNA648767	HiSeq 4000	12.0137	Within < 1 week	9	M	44.6118	-1.99314	1	NA	12.0534	0.998206	11.9376	12.3684
AMB_186	PRJNA648767	HiSeq 4000	6.6749	Within < 1 week	14	M	41.4671	-0.284413	0	NA	13.7805	0.997935	6.7644	6.51698
AMB_186_B	PRJNA648767	HiSeq 4000	10.2587	Within < 1 week	NA	M	46.6929	-0.117859	0	NA	11.9642	0.996935	11.2989	10.9668
AMB_187	PRJNA648767	HiSeq 4000	1.9274	Within < 1 week	20	F	NA	NA	0	NA	18.9056	0.997853	3.52146	3.75894
AMB_188	PRJNA648767	HiSeq 4000	7.9343	Within < 1 week	15	M	46.4736	-0.609877	2	NA	15.3368	0.999384	6.34932	5.88365
AMB_189	PRJNA648767	HiSeq 4000	7.5099	Within < 1 week	14	F	33.6485	-1.79964	1	1.56383	32.0292	0.998249	7.56694	7.32521
AMB_189_B	PRJNA648767	HiSeq 4000	17.6235	Within < 1 week	13	F	NA	NA	1	1.13203	9.87535	0.99791	12.2438	12.6121
AMB_190	PRJNA648767	HiSeq 4000	7.833	Within < 1 week	11	M	50.4289	3.3359	0	NA	8.63271	0.994842	8.74228	8.38083
AMB_191	PRJNA648767	HiSeq 4000	7.7591	Within < 1 week	9	M	44.6526	-2.09948	0	NA	12.9147	0.998113	7.76689	7.70116
AMB_191_B	PRJNA648767	HiSeq 4000	9.9877	Within < 1 week	NA	M	47.735	0.892356	0	NA	13.5551	0.997896	9.44841	9.69878
AMB_192	PRJNA648767	HiSeq 4000	6.8145	Within < 1 week	16	M	37.2647	-5.13082	1	NA	14.1664	0.997744	6.50599	6.68236
AMB_193	PRJNA648767	HiSeq 4000	6.5927	Within < 1 week	13	M	38.3248	-3.04783	0	NA	40.4287	0.994879	6.21878	6.42211
AMB_194	PRJNA648767	HiSeq 4000	8.2601	Within < 1 week	NA	F	NA	NA	2	NA	18.6381	0.998075	7.15257	7.46054
AMB_195	PRJNA648767	HiSeq 4000	10.4203	Within < 1 week	NA	F	NA	NA	1	NA	18.6366	0.997868	8.58178	7.78801
AMB_196	PRJNA648767	HiSeq 4000	4.7529	Within < 1 week	15	F	36.8622	4.11253	2	NA	16.5713	0.99936	7.82111	7.74475
AMB_32	SRP058411	HiSeq 2000	14.2861	Within < 1 week	15	M	45.3705	-0.967879	2	NA	28.6051	0.996636	12.3206	13.0432
AMB_197	PRJNA648767	HiSeq 4000	8.1342	Within < 1 week	11	F	32.1651	-3.32977	1	1.20274	10.5997	0.997925	9.30672	8.5547
AMB_198	PRJNA648767	HiSeq 4000	8.2437	Within < 1 week	2	M	NA	NA	1	NA	16.4586	0.999276	12.7109	13.4113
AMB_198_B	PRJNA648767	HiSeq 4000	11.2471	Within < 1 week	7	M	41.547	-5.14781	1	NA	11.1091	0.997942	10.8991	10.8367
AMB_199	PRJNA648767	HiSeq 4000	13.2293	Within < 1 week	13	M	45.5831	-0.879256	1	NA	11.2456	0.997967	11.9508	12.2889
AMB_200	PRJNA648767	HiSeq 4000	4.5038	Within < 1 week	6	F	29.9736	-1.92195	1	1.49332	24.7187	0.998192	6.89967	6.71252
AMB_201	PRJNA648767	HiSeq 4000	5.7988	Within < 1 week	9	M	34.5246	-3.18605	0	NA	12.3223	0.998061	6.42688	6.87799
AMB_34	SRP058411	HiSeq 2000	6.1273	Within < 1 week	NA	F	NA	NA	2	NA	40.1993	0.996322	5.46456	5.45774
AMB_202	PRJNA648767	HiSeq 4000	8.4463	Within < 1 week	7	F	35.5562	0.0380627	1	1.34603	11.0286	0.998113	8.62791	8.52782
AMB_203	PRJNA648767	HiSeq 4000	5.5168	Within < 1 week	8	F	34.4388	-0.860239	0	0.159066	17.8883	0.998055	7.68826	7.82023
AMB_204	PRJNA648767	HiSeq 4000	8.2108	Within < 1 week	2	F	34.7139	-0.786652	0	1.12612	10.9861	0.999319	8.84657	8.94263
AMB_35	SRP058411	HiSeq 2000	3.9617	Within < 1 week	NA	F	29.3666	-0.670226	1	NA	19.6528	0.999435	4.99785	5.40754
AMB_205	PRJNA648767	HiSeq 4000	4.4983	Within < 1 week	17	M	31.4148	-0.29766	0	NA	13.5875	0.998015	5.6458	5.12499
AMB_206	PRJNA648767	HiSeq 4000	9.692	Within < 1 week	5	M	50.6736	3.79634	0	NA	8.0998	0.998081	8.74183	9.40705
AMB_64	SRP058411	HiSeq 2000	6.4832	Within < 1 week	17	M	40.3788	-0.488797	0	NA	23.5069	0.996678	6.60385	6.19552
AMB_207	PRJNA648767	HiSeq 4000	5.2786	Within < 1 week	9	F	37.7317	3.17966	1	NA	6.11552	0.998166	7.29543	7.25114
AMB_208	PRJNA648767	HiSeq 4000	6.7926	Within < 1 week	4	F	40.355	4.96054	1	1.39964	7.23198	0.998062	7.92364	7.45626
AMB_36	SRP058411	HiSeq 2000	6.7598	Within < 1 week	NA	M	40.8575	-1.28549	1	NA	54.1538	0.996685	8.69592	8.47984
AMB_37	SRP058411	HiSeq 2000	6.1054	Within < 1 week	11	M	36.2856	-2.83931	1	NA	56.9445	0.996774	7.7428	8.01384
AMB_209	PRJNA648767	HiSeq 4000	10.5079	Within < 1 week	NA	F	NA	NA	2	NA	7.98044	0.998032	7.25649	8.40094
AMB_210	PRJNA648767	HiSeq 4000	10.0287	Within < 1 week	6	M	47.9747	1.13693	1	NA	9.17763	0.998179	9.34675	9.6695
AMB_211	PRJNA648767	HiSeq 4000	4.4381	Within < 1 week	2	F	30.6242	-1.046	1	0.695162	19.311	0.997834	7.72758	8.06142
AMB_212	PRJNA648767	HiSeq 4000	15.0554	Within < 1 week	3	F	38.1376	2.12492	1	0.907103	19.4761	0.999296	11.4023	12.0242
AMB_213	PRJNA648767	HiSeq 4000	5.7194	Within < 1 week	6	F	33.1105	-2.20366	1	1.17411	12.775	0.999386	8.27027	8.06264
AMB_214	PRJNA648767	HiSeq 4000	17.0595	Within < 1 week	NA	F	40.9875	4.82489	0	NA	27.783	0.998081	9.5639	9.70583
AMB_215	PRJNA648767	HiSeq 4000	4.6872	Within < 1 week	2	F	34.8513	2.32686	1	1.51871	11.6698	0.999362	6.83708	6.80441
AMB_216	PRJNA648767	HiSeq 4000	7.0062	Within < 1 week	12	M	NA	NA	2	NA	15.6483	0.997972	6.95894	6.41918
AMB_217	PRJNA648767	HiSeq 4000	7.6085	Within < 1 week	4	M	47.8953	1.8377	3	NA	18.2474	0.998088	8.14405	7.63705
AMB_218	PRJNA648767	HiSeq 4000	5.8891	Within < 1 week	NA	F	NA	NA	1	NA	12.9164	0.998134	5.62328	6.43445
AMB_219	PRJNA648767	HiSeq 4000	5.7906	Within < 1 week	3	F	33.3114	-2.00808	2	1.08576	14.8576	0.997909	8.6341	8.6509
AMB_220	PRJNA648767	HiSeq 4000	6.0589	Within < 1 week	7	F	29.7245	-5.61508	2	0.712391	21.7922	0.998212	8.14091	7.97435
AMB_221	PRJNA648767	HiSeq 4000	13.5031	Within < 1 week	NA	F	NA	NA	1	NA	25.951	0.998015	11.2012	11.2356
AMB_222	PRJNA648767	HiSeq 4000	7.1786	Within < 1 week	15	M	40.05	-4.02501	3	NA	16.016	0.999285	8.92461	8.80866
AMB_65	SRP058411	HiSeq 2000	9.2293	Within < 1 week	18	F	34.9751	-0.601707	1	-0.373031	27.1489	0.999526	8.5693	8.80301
AMB_223	PRJNA648767	HiSeq 4000	12.1752	Within < 1 week	NA	F	36.8158	1.01865	1	NA	20.2706	0.997984	11.1941	11.0126
AMB_224	PRJNA648767	HiSeq 4000	7.8631	Within < 1 week	NA	M	50.4058	3.31394	1	NA	26.4733	0.998039	8.04094	8.10113
AMB_225	PRJNA648767	HiSeq 4000	12.3723	Within < 1 week	2	F	37.5639	1.75198	NA	0.922111	11.4718	0.998247	10.5285	10.9715
AMB_226	PRJNA648767	HiSeq 4000	8.6571	Within < 1 week	4	M	47.2141	0.215426	2	NA	12.6372	0.998069	6.97277	7.15145
AMB_227	PRJNA648767	HiSeq 4000	4.7502	Within < 1 week	16	M	32.0279	-0.846357	0	NA	41.2233	0.998028	4.84583	5.11211
AMB_228	PRJNA648767	HiSeq 4000	6.9487	Within < 1 week	NA	F	37.3799	1.97371	3	NA	7.58454	0.998029	8.00701	8.37886
AMB_229	PRJNA648767	HiSeq 4000	5.0541	Within < 1 week	25	F	34.3588	0.576491	1	-0.318864	24.3975	0.996652	8.25809	8.21824
AMB_229_B	PRJNA648767	HiSeq 4000	8.1013	Within < 1 week	NA	F	37.265	1.7726	1	0.566076	7.98105	0.997957	7.89353	7.50581
AMB_230	PRJNA648767	HiSeq 4000	8.345	Within < 1 week	1	M	48.9277	1.8924	0	NA	8.31488	0.998015	8.81488	8.93251
AMB_230_C	PRJNA648767	HiSeq 4000	10.5517	Within < 1 week	1	M	46.5977	-0.178728	0	NA	10.1546	0.99787	10.0221	10.2894
AMB_231	PRJNA648767	HiSeq 4000	5.6345	Within < 1 week	7	M	36.2939	-0.659074	2	NA	10.1382	0.996552	5.85679	6.28446
AMB_232	PRJNA648767	HiSeq 4000	8.1068	Within < 1 week	1	M	44.3004	-2.76288	0	NA	10.6951	0.997893	8.82096	8.71476
AMB_233	PRJNA648767	HiSeq 4000	4.3422	Within < 1 week	19	M	30.6372	-0.35555	1	NA	9.12814	0.99804	6.30901	6.32963
AMB_234	PRJNA648767	HiSeq 4000	5.18	Within < 1 week	NA	F	34.2525	0.0384413	0	NA	12.3922	0.998073	6.83805	6.59587
AMB_235	PRJNA648767	HiSeq 4000	6.2149	Within < 1 week	15	M	40.3831	0.753069	2	NA	16.682	0.999264	7.29646	7.27855
AMB_236	PRJNA648767	HiSeq 4000	5.6071	Within < 1 week	4	M	44.1988	7.37212	1	NA	13.5781	0.997943	7.65232	7.7209
AMB_237	PRJNA648767	HiSeq 4000	9.5606	Within < 1 week	6	M	47.9163	1.02361	0	NA	10.5	0.998302	9.27231	9.31558
AMB_238	PRJNA648767	HiSeq 4000	14.7433	Within < 1 week	NA	M	43.6555	-2.62915	0	NA	23.196	0.994878	16.8789	16.8472
AMB_239	PRJNA648767	HiSeq 4000	10.8063	Within < 1 week	6	M	47.64	0.893461	0	NA	16.8172	0.997862	12.3251	12.7097
AMB_239_B	PRJNA648767	HiSeq 4000	13.5277	Within < 1 week	10	M	51.6889	5.26164	0	NA	16.5793	0.998034	16.2156	16.2435
AMB_240	PRJNA648767	HiSeq 4000	14.7871	Within < 1 week	16	F	33.437	-2.55557	0	1.21092	15.891	0.998206	13.894	13.5964
AMB_241	PRJNA648767	HiSeq 4000	13.4292	Within 3 months	14	F	35.6092	-0.281798	1	1.54596	10.8141	0.998239	9.85314	9.52033
AMB_242	PRJNA648767	HiSeq 4000	8.8871	Within < 1 week	6	M	NA	NA	1	NA	13.4687	0.998272	9.85381	9.5121
AMB_243	PRJNA648767	HiSeq 4000	18.0589	Within < 1 week	20	F	34.302	-1.93536	0	0.313894	8.05707	0.998163	11.7189	12.0336
AMB_244	PRJNA648767	HiSeq 4000	19.7563	Within < 1 week	12	F	33.28	-3.08434	NA	0.899395	8.09134	0.998249	10.5623	10.5039
AMB_244_B	PRJNA648767	HiSeq 4000	25.3196	Within < 1 week	13	F	39.6148	2.83422	NA	0.837451	12.9887	0.997026	11.8766	11.9734
AMB_245	PRJNA648767	HiSeq 4000	13.5907	Within 3 months	9	M	46.6509	0.230939	1	NA	21.6729	0.997903	14.3871	14.6098
AMB_46	SRP058411	HiSeq 2000	4.0082	Within < 1 week	NA	F	31.5562	1.35971	1	NA	53.4818	0.996442	4.73525	4.49016
AMB_46_B	PRJNA648767	HiSeq 4000	9.0842	Within < 1 week	NA	F	NA	NA	1	NA	7.52678	0.998243	8.64187	9.28691
AMB_246	PRJNA648767	HiSeq 4000	5.3799	Within < 1 week	22	F	NA	NA	1	0.703496	38.8252	0.994828	7.40851	7.05034
AMB_247	PRJNA648767	HiSeq 4000	4.7995	Within < 1 week	13	F	NA	NA	0	NA	8.89388	0.998241	10.5324	10.5323
AMB_248	PRJNA648767	HiSeq 4000	6.4422	Within < 1 week	NA	F	NA	NA	1	NA	26.7398	0.99803	7.86774	7.50109
AMB_249	PRJNA648767	HiSeq 4000	4.3203	Within < 1 week	7	F	30.7308	-0.535757	0	NA	20.0855	0.998068	5.33707	5.78833
AMB_250	PRJNA648767	HiSeq 4000	9.3279	Within < 1 week	2	M	47.4363	0.516316	1	NA	9.77297	0.998304	10.2648	10.7925
AMB_251	PRJNA648767	HiSeq 4000	10.0151	Within < 1 week	26	F	34.7718	-0.863728	1	1.0532	10.4436	0.998191	11.0223	11.189
AMB_252	PRJNA648767	HiSeq 4000	5.9083	Within < 1 week	NA	M	36.1322	-2.08359	2	NA	13.3859	0.998017	8.24229	8.46902
AMB_253	PRJNA648767	HiSeq 4000	9.9274	Within < 1 week	NA	M	48.9497	2.10002	0	NA	8.23874	0.998322	9.78343	9.81835
AMB_254	PRJNA648767	HiSeq 4000	6.6913	Within < 1 week	NA	F	NA	NA	2	NA	17.1548	0.997825	8.47462	8.07459
AMB_255	PRJNA648767	HiSeq 4000	4.0411	Within < 1 week	NA	F	29.1358	-1.17327	1	NA	12.5864	0.998031	4.49946	4.4466
AMB_47	SRP058411	HiSeq 2000	3.6331	Within < 1 week	19	M	30.5208	2.79865	1	NA	40.4872	0.998515	3.50211	3.73592
AMB_256	PRJNA648767	HiSeq 4000	6.7105	Within < 1 week	NA	M	48.9319	7.01621	1	NA	12.831	0.998064	6.20729	5.60216
AMB_257	PRJNA648767	HiSeq 4000	6.5325	Within < 1 week	NA	M	38.3216	-2.77331	2	NA	45.6261	0.995047	5.53871	5.71551
AMB_258	PRJNA648767	HiSeq 4000	16.1643	Within < 1 week	5	F	33.6211	-2.47449	0	1.76602	13.2351	0.998144	11.2273	11.6087
AMB_259	PRJNA648767	HiSeq 4000	6.8255	Within < 1 week	NA	F	NA	NA	0	NA	5.27073	0.998435	10.2035	10.409
AMB_260	PRJNA648767	HiSeq 4000	8.3532	Within < 1 week	4	M	47.868	0.833601	1	NA	9.27512	0.998289	10.0878	9.97494
AMB_261	PRJNA648767	HiSeq 4000	4.9418	Within < 1 week	5	F	35.1899	1.79244	0	1.30167	8.59535	0.998186	7.56251	7.7102
AMB_262	PRJNA648767	HiSeq 4000	7.3429	Within < 1 week	NA	F	NA	NA	1	NA	16.0713	0.998027	8.21733	8.19367
AMB_68	SRP058411	HiSeq 2000	2.9158	Within < 1 week	NA	F	27.458	1.00699	0	NA	19.0783	0.999537	1.97051	1.67047
AMB_263	PRJNA648767	HiSeq 4000	7.6934	Within < 1 week	NA	M	54.1621	7.71309	1	NA	19.7006	0.998032	8.82698	8.83698
AMB_264	PRJNA648767	HiSeq 4000	7.0089	Within < 1 week	10	M	45.4411	2.14897	1	NA	19.379	0.998096	6.15859	6.26998
AMB_265	PRJNA648767	HiSeq 4000	6.5626	Within < 1 week	6	F	32.1979	-3.17939	0	1.27746	13.9997	0.998096	8.859	8.93854
AMB_265_B	PRJNA648767	HiSeq 4000	13.7495	Within < 1 week	6	F	NA	NA	0	1.12849	13.6677	0.997879	11.9236	12.2265
AMB_266	PRJNA648767	HiSeq 4000	9.9357	Within < 1 week	NA	F	NA	NA	NA	NA	19.634	0.997865	8.31655	7.99501
AMB_267	PRJNA648767	HiSeq 4000	6.9514	Within < 1 week	2	F	33.5382	-1.8681	0	1.42176	12.1446	0.998098	7.58155	7.80153
AMB_268	PRJNA648767	HiSeq 4000	7.1622	Within < 1 week	3	F	NA	NA	2	1.23573	10.5404	0.998319	7.83964	7.68767
AMB_268_B	PRJNA648767	HiSeq 4000	18.2341	Within < 1 week	6	F	35.0889	-1.16159	2	1.13403	11.9373	0.997727	10.9757	11.5502
AMB_269	PRJNA648767	HiSeq 4000	8.1232	Within < 1 week	30	F	NA	NA	1	0.809144	12.3491	0.9983	8.71924	8.51955
AMB_48	SRP058411	HiSeq 2000	10.6092	Within < 1 week	NA	M	45.1364	-1.63326	2	NA	19.7627	0.998506	9.94731	9.73221
AMB_49	SRP058411	HiSeq 2000	11.8467	Within < 1 week	NA	M	46.1889	-0.435625	0	NA	38.8456	0.99808	11.2495	11.1484
AMB_270	PRJNA648767	HiSeq 4000	7.039	Within < 1 week	19	M	50.3496	6.91864	1	NA	15.0949	0.999294	7.11893	7.30507
AMB_271	PRJNA648767	HiSeq 4000	5.4702	Within < 1 week	NA	F	NA	NA	0	NA	15.0507	0.998019	6.21327	5.92575
AMB_272	PRJNA648767	HiSeq 4000	7.2745	Within < 1 week	8	M	46.8161	2.29913	1	NA	16.3835	0.997957	7.47815	7.54817
AMB_69	SRP058411	HiSeq 2000	7.5729	Within < 1 week	11	M	49.9763	4.08294	0	NA	23.7215	0.998134	9.3989	9.10848
AMB_69_B	PRJNA648767	HiSeq 4000	10.7269	Within < 1 week	5	M	48.0854	1.32956	0	NA	8.75986	0.998301	10.929	10.512
AMB_273	PRJNA648767	HiSeq 4000	8.7091	Within < 1 week	10	F	31.8404	-3.69745	1	1.08467	13.7401	0.99819	8.41182	8.25877
AMB_274	PRJNA648767	HiSeq 4000	11.989	Within < 1 week	NA	M	NA	NA	1	NA	11.3136	0.996742	14.293	14.7234
AMB_275	PRJNA648767	HiSeq 4000	6.245	Within < 1 week	9	M	35.2075	-4.56151	1	NA	13.3586	0.99783	6.78659	6.44714
AMB_276	PRJNA648767	HiSeq 4000	6.3436	Within < 1 week	11	F	38.1226	2.76175	2	1.53754	23.7054	0.996595	9.75131	9.79988
AMB_277	PRJNA648767	HiSeq 4000	7.4579	Within < 1 week	17	F	39.257	3.81272	1	0.527287	14.5529	0.998232	7.6803	8.25992
AMB_278	PRJNA648767	HiSeq 4000	6.7461	Within < 1 week	9	M	37.8018	-4.27803	0	NA	13.8129	0.997985	8.23787	8.69908
AMB_278_B	PRJNA648767	HiSeq 4000	10.5654	Within < 1 week	3	M	NA	NA	0	NA	10.624	0.999288	11.1581	10.867
AMB_279	PRJNA648767	HiSeq 4000	10.9541	Within < 1 week	18	F	37.2613	1.55553	1	0.0503232	19.7747	0.999303	11.8249	11.5576
AMB_280	PRJNA648767	HiSeq 4000	6.6283	Within < 1 week	NA	M	38.3818	-3.155	2	NA	19.5789	0.998082	7.55749	7.28171
AMB_281	PRJNA648767	HiSeq 4000	18.9541	Within 3 months	14	M	43.5821	NA	NA	NA	20.4947	0.998081	NA	15.024
AMB_282_B	PRJNA648767	HiSeq 4000	11.2854	Within < 1 week	7	M	53.9377	NA	NA	NA	13.4604	0.997918	NA	11.0177
AMB_282	PRJNA648767	HiSeq 4000	13.7604	Within < 1 week	NA	M	48.4659	NA	NA	NA	9.80632	0.997915	NA	12.6701
AMB_77_B	PRJNA648767	HiSeq 4000	8.5448	Within < 1 week	1	M	48.9277	NA	0	NA	11.5546	0.997917	NA	9.50664
AMB_152_B	PRJNA648767	HiSeq 4000	14.193	Within < 1 week	6	M	43.8546	NA	3	NA	11.9063	0.998012	NA	10.1437
AMB_283	PRJNA648767	HiSeq 4000	9.8453	Within < 1 week	3	M	51.648	NA	NA	NA	10.7392	0.998154	NA	9.70631
AMB_283_B	PRJNA648767	HiSeq 4000	14.0726	Within 3 months	8	M	45.6412	NA	NA	NA	10.2616	0.998018	NA	10.3293
AMB_230_B	PRJNA648767	HiSeq 4000	9.7276	Within 3 months	1	M	57.6323	NA	0	NA	8.27018	0.998169	NA	10.805
AMB_69_C	PRJNA648767	HiSeq 4000	14.5298	Within < 1 week	5	M	NA	NA	0	NA	6.36946	0.997966	NA	11.3133
