# Supplementary material for: High social status males experience accelerated epigenetic aging in wild baboons
Source: eLife journal article supplement (doi:10.7554/elife.66128), 2021-04-05
Supplement: supp [file elife-66128-supp-v1.zip › elife_poa_e66128_Supplementary_file_2.xlsx]

## Sheet: Supplementary Table 2
CpG_site	Panu2_chromosome	Panu2_coordinate	Panu2_coordinate+1	Clock_Beta_(Average_methylation_change_per_year)	H3K4me1 enhancers	Promoters	Promoters Ensembl gene IDs	Gene bodies	Gene bodies Ensembl gene IDs	CpG islands	CpG island shores
chr1_116642037	chr1	116642037	116642038	0.000106476	0	0	NA	0	NA	1	0
chr1_125165468	chr1	125165468	125165469	2.78e-05	0	0	NA	1	ENSPANG00000001762	0	0
chr1_12867884	chr1	12867884	12867885	1.67e-06	1	0	NA	1	ENSPANG00000015220	1	0
chr1_129019578	chr1	129019578	129019579	-0.000130973	1	1	ENSPANG00000023525	1	ENSPANG00000009078	0	1
chr1_134107974	chr1	134107974	134107975	0.00538598	1	0	NA	0	NA	0	1
chr1_137384645	chr1	137384645	137384646	0.00369711	0	1	ENSPANG00000007722	1	ENSPANG00000022550	0	0
chr1_13794096	chr1	13794096	13794097	7.38e-05	0	0	NA	0	NA	0	0
chr1_13794123	chr1	13794123	13794124	0.000519378	0	0	NA	0	NA	0	0
chr1_147993965	chr1	147993965	147993966	7.85e-07	0	0	NA	0	NA	1	1
chr1_152409068	chr1	152409068	152409069	-0.0245559	0	0	NA	0	NA	0	0
chr1_1619131	chr1	1619131	1619132	0.0157212	1	0	NA	1	ENSPANG00000001128	1	0
chr1_181580606	chr1	181580606	181580607	5.64e-05	0	0	NA	0	NA	0	0
chr1_190730999	chr1	190730999	190731000	6.6e-05	0	0	NA	0	NA	0	0
chr1_190731006	chr1	190731006	190731007	2.06e-05	0	0	NA	0	NA	0	0
chr1_190731010	chr1	190731010	190731011	5.33e-08	0	0	NA	0	NA	0	0
chr1_203531196	chr1	203531196	203531197	-3.34e-06	0	0	NA	1	ENSPANG00000009793	0	0
chr1_207036	chr1	207036	207037	0.00403453	0	0	NA	1	ENSPANG00000004306	1	0
chr1_20704997	chr1	20704997	20704998	0.000101264	0	0	NA	0	NA	0	0
chr1_219620523	chr1	219620523	219620524	0.000882887	0	0	NA	1	ENSPANG00000005524	1	1
chr1_2247100	chr1	2247100	2247101	0.0284966	0	0	NA	0	NA	0	0
chr1_24033287	chr1	24033287	24033288	-0.00451879	0	0	NA	0	NA	0	0
chr1_3369428	chr1	3369428	3369429	3.66e-06	0	0	NA	1	ENSPANG00000018511	0	0
chr1_34481828	chr1	34481828	34481829	2.77e-06	0	0	NA	1	ENSPANG00000007204	0	1
chr1_38367522	chr1	38367522	38367523	-9.96e-05	0	0	NA	1	ENSPANG00000011822	0	0
chr1_38702364	chr1	38702364	38702365	-6.59e-07	0	0	NA	1	ENSPANG00000009801	0	0
chr1_40040628	chr1	40040628	40040629	0.0001065	0	0	NA	1	ENSPANG00000023477	1	0
chr1_40040637	chr1	40040637	40040638	2.97e-05	0	0	NA	1	ENSPANG00000023477	1	0
chr1_49630	chr1	49630	49631	0.00075352	0	0	NA	0	NA	1	0
chr1_5221985	chr1	5221985	5221986	0.023683	1	0	NA	1	ENSPANG00000022731	0	0
chr1_5222043	chr1	5222043	5222044	0.000542816	1	0	NA	1	ENSPANG00000022731	0	0
chr1_56996806	chr1	56996806	56996807	3.11e-05	0	0	NA	1	ENSPANG00000014332	1	0
chr1_58676995	chr1	58676995	58676996	-3.97e-05	1	0	NA	0	NA	0	0
chr1_5925344	chr1	5925344	5925345	-0.00262077	0	0	NA	1	ENSPANG00000000780	0	1
chr1_60865125	chr1	60865125	60865126	7.07e-06	1	0	NA	0	NA	0	0
chr1_60865158	chr1	60865158	60865159	0.00169534	1	0	NA	0	NA	0	0
chr1_6086819	chr1	6086819	6086820	0.000438746	0	0	NA	1	ENSPANG00000000780	0	1
chr1_6773954	chr1	6773954	6773955	-0.000144024	0	0	NA	0	NA	0	1
chr1_85893175	chr1	85893175	85893176	0.000699462	1	0	NA	1	ENSPANG00000000769	1	0
chr1_8814726	chr1	8814726	8814727	0.000137144	1	0	NA	1	ENSPANG00000009081	0	0
chr1_8867206	chr1	8867206	8867207	-0.000682813	0	0	NA	0	NA	0	0
chr1_8867292	chr1	8867292	8867293	-8.26e-05	0	0	NA	0	NA	0	0
chr1_91400940	chr1	91400940	91400941	0.0565876	0	0	NA	0	NA	1	0
chr1_9444285	chr1	9444285	9444286	0.0107849	0	0	NA	1	ENSPANG00000021173	0	1
chr1_9444380	chr1	9444380	9444381	4.65e-05	0	0	NA	1	ENSPANG00000021173	0	1
chr10_1313843	chr10	1313843	1313844	1.66e-05	0	0	NA	0	NA	0	0
chr10_13625011	chr10	13625011	13625012	-0.000341977	0	0	NA	1	ENSPANG00000011165	0	0
chr10_15811325	chr10	15811325	15811326	-0.000160569	0	0	NA	0	NA	0	0
chr10_18215097	chr10	18215097	18215098	0.000106098	0	0	NA	0	NA	1	0
chr10_18215140	chr10	18215140	18215141	7.45e-05	0	0	NA	0	NA	1	0
chr10_18215152	chr10	18215152	18215153	0.0339831	0	0	NA	0	NA	1	0
chr10_18215202	chr10	18215202	18215203	5.7e-06	0	0	NA	0	NA	1	0
chr10_18215247	chr10	18215247	18215248	0.000187704	0	0	NA	1	ENSPANG00000019640	1	0
chr10_18215356	chr10	18215356	18215357	0.0106289	0	0	NA	1	ENSPANG00000019640	1	0
chr10_18215396	chr10	18215396	18215397	0.0234636	0	0	NA	1	ENSPANG00000019640	1	0
chr10_18246776	chr10	18246776	18246777	0.0772523	0	0	NA	1	ENSPANG00000019640	1	1
chr10_1841647	chr10	1841647	1841648	7.46e-06	0	0	NA	0	NA	0	1
chr10_1907881	chr10	1907881	1907882	-3.07e-05	1	1	ENSPANG00000018573	0	NA	0	1
chr10_231979	chr10	231979	231980	2.6e-06	0	0	NA	1	ENSPANG00000024134	1	1
chr10_232126	chr10	232126	232127	2.62e-06	0	0	NA	1	ENSPANG00000024134	1	1
chr10_2568363	chr10	2568363	2568364	3.01e-06	0	0	NA	1	ENSPANG00000011746	0	0
chr10_27303616	chr10	27303616	27303617	3.02e-05	0	0	NA	1	ENSPANG00000024498	1	0
chr10_30449987	chr10	30449987	30449988	7.17e-06	0	0	NA	1	ENSPANG00000018096	0	0
chr10_30449990	chr10	30449990	30449991	0.00218717	0	0	NA	1	ENSPANG00000018096	0	0
chr10_32097198	chr10	32097198	32097199	-5.65e-05	1	0	NA	1	ENSPANG00000016045	0	1
chr10_32646423	chr10	32646423	32646424	-9.3e-05	0	0	NA	0	NA	0	0
chr10_4710051	chr10	4710051	4710052	8.47e-05	0	0	NA	0	NA	0	0
chr10_53084796	chr10	53084796	53084797	0.00246764	0	0	NA	0	NA	1	1
chr10_5599934	chr10	5599934	5599935	-4.02e-05	0	0	NA	1	ENSPANG00000026180	1	0
chr10_58203953	chr10	58203953	58203954	0.0178042	0	0	NA	1	ENSPANG00000018214	1	0
chr10_62597144	chr10	62597144	62597145	2.84e-05	0	0	NA	1	ENSPANG00000020040	0	0
chr10_64960804	chr10	64960804	64960805	-2.75e-05	1	0	NA	0	NA	0	0
chr10_6592196	chr10	6592196	6592197	0.000342944	0	0	NA	1	ENSPANG00000005902	0	0
chr10_6626451	chr10	6626451	6626452	5.58e-05	0	0	NA	0	NA	0	0
chr10_6885347	chr10	6885347	6885348	3.89e-05	1	0	NA	1	ENSPANG00000020919	0	0
chr10_69876120	chr10	69876120	69876121	1.08e-05	0	0	NA	1	ENSPANG00000011720	0	0
chr10_70994705	chr10	70994705	70994706	1.97e-05	0	0	NA	0	NA	0	0
chr10_70994715	chr10	70994715	70994716	1.31e-05	0	0	NA	0	NA	0	0
chr10_71868892	chr10	71868892	71868893	6.74e-06	1	0	NA	0	NA	0	0
chr10_72222609	chr10	72222609	72222610	8.16e-05	0	0	NA	1	ENSPANG00000015908	0	1
chr10_7373363	chr10	7373363	7373364	-0.0100709	0	0	NA	0	NA	0	0
chr10_76782714	chr10	76782714	76782715	0.0519391	0	0	NA	1	ENSPANG00000012338	0	0
chr10_76782787	chr10	76782787	76782788	7.97e-05	0	0	NA	1	ENSPANG00000012338	0	0
chr10_78350730	chr10	78350730	78350731	0.00031293	0	0	NA	0	NA	1	0
chr10_78350949	chr10	78350949	78350950	1.73e-05	0	0	NA	0	NA	1	0
chr10_78350969	chr10	78350969	78350970	0.041711	0	0	NA	0	NA	1	0
chr10_80276317	chr10	80276317	80276318	0.015366	0	0	NA	1	ENSPANG00000016392	0	0
chr10_81860532	chr10	81860532	81860533	-0.000330396	0	1	ENSPANG00000001251	0	NA	0	1
chr10_86227247	chr10	86227247	86227248	-2.79e-05	0	0	NA	0	NA	0	1
chr10_88716219	chr10	88716219	88716220	-0.00618822	0	0	NA	1	ENSPANG00000021085	0	0
chr10_88758087	chr10	88758087	88758088	0.0105763	0	0	NA	1	ENSPANG00000021085	0	0
chr11_113045028	chr11	113045028	113045029	0.00526245	0	0	NA	1	ENSPANG00000004795	0	0
chr11_113892960	chr11	113892960	113892961	1.64e-05	0	0	NA	1	ENSPANG00000008730	1	1
chr11_118840944	chr11	118840944	118840945	1.8e-05	0	0	NA	1	ENSPANG00000005323	1	0
chr11_120997249	chr11	120997249	120997250	-7.37e-05	0	0	NA	0	NA	0	1
chr11_120997262	chr11	120997262	120997263	-0.000109005	0	0	NA	0	NA	0	1
chr11_12127486	chr11	12127486	12127487	0.000284929	1	0	NA	0	NA	0	0
chr11_121310185	chr11	121310185	121310186	0.00922398	1	0	NA	0	NA	0	0
chr11_123858670	chr11	123858670	123858671	0.00736519	0	0	NA	1	ENSPANG00000005290	0	0
chr11_129353889	chr11	129353889	129353890	0.000322288	0	0	NA	1	ENSPANG00000013056	1	0
chr11_129678568	chr11	129678568	129678569	-0.00115493	0	0	NA	0	NA	0	0
chr11_130451934	chr11	130451934	130451935	0.0106472	0	0	NA	0	NA	0	1
chr11_130451967	chr11	130451967	130451968	0.00717046	0	0	NA	0	NA	0	1
chr11_131305129	chr11	131305129	131305130	-6.54e-05	0	0	NA	0	NA	0	1
chr11_25721084	chr11	25721084	25721085	-1.95e-05	0	0	NA	0	NA	0	0
chr11_3351573	chr11	3351573	3351574	-1.8e-05	0	0	NA	1	ENSPANG00000020211	0	0
chr11_34202021	chr11	34202021	34202022	2.17e-05	0	0	NA	0	NA	1	0
chr11_34746026	chr11	34746026	34746027	2.43e-05	0	0	NA	0	NA	0	0
chr11_34751216	chr11	34751216	34751217	0.0359933	0	0	NA	0	NA	0	0
chr11_45362630	chr11	45362630	45362631	4.72e-05	0	0	NA	1	ENSPANG00000017210	1	0
chr11_47866287	chr11	47866287	47866288	1.02e-05	0	0	NA	0	NA	0	0
chr11_47866382	chr11	47866382	47866383	0.000149902	0	0	NA	0	NA	0	0
chr11_49978641	chr11	49978641	49978642	-0.00313097	1	0	NA	0	NA	0	1
chr11_5523054	chr11	5523054	5523055	4.99e-05	0	1	ENSPANG00000018735	0	NA	0	1
chr11_5523071	chr11	5523071	5523072	0.0061848	1	1	ENSPANG00000018735	0	NA	0	1
chr11_5523078	chr11	5523078	5523079	0.0212728	1	1	ENSPANG00000018735	0	NA	0	1
chr11_6642124	chr11	6642124	6642125	0.0717326	1	0	NA	0	NA	0	1
chr11_84575841	chr11	84575841	84575842	-1.52e-05	1	0	NA	0	NA	0	0
chr12_101075735	chr12	101075735	101075736	-7.81e-05	1	0	NA	0	NA	0	0
chr12_101075747	chr12	101075747	101075748	-0.00336731	1	0	NA	0	NA	0	0
chr12_103587934	chr12	103587934	103587935	3.63e-05	0	0	NA	1	ENSPANG00000016562	0	0
chr12_103637174	chr12	103637174	103637175	5.65e-05	0	0	NA	1	ENSPANG00000016825	0	0
chr12_18271948	chr12	18271948	18271949	0.0369365	1	0	NA	1	ENSPANG00000017851	1	1
chr12_18271956	chr12	18271956	18271957	0.000157001	1	0	NA	1	ENSPANG00000017851	1	1
chr12_32667279	chr12	32667279	32667280	0.0248023	1	0	NA	1	ENSPANG00000015015	1	0
chr12_36501784	chr12	36501784	36501785	-0.027296	1	0	NA	1	ENSPANG00000019541	0	0
chr12_38014396	chr12	38014396	38014397	5.75e-05	0	0	NA	1	ENSPANG00000015229	1	0
chr12_38104333	chr12	38104333	38104334	5.84e-05	0	0	NA	1	ENSPANG00000000543	1	0
chr12_38104339	chr12	38104339	38104340	0.0179428	0	0	NA	1	ENSPANG00000000543	1	0
chr12_38121687	chr12	38121687	38121688	0.000135983	1	0	NA	1	ENSPANG00000009593	1	0
chr12_80691087	chr12	80691087	80691088	0.0142021	0	0	NA	0	NA	1	0
chr12_80928967	chr12	80928967	80928968	-0.00790183	0	0	NA	0	NA	0	0
chr12_83487486	chr12	83487486	83487487	3.97e-06	0	1	ENSPANG00000022149	0	NA	1	0
chr12_94231951	chr12	94231951	94231952	2.5e-05	0	0	NA	1	ENSPANG00000019815	1	0
chr12_98866577	chr12	98866577	98866578	-3.19e-06	0	0	NA	0	NA	0	0
chr13_100834707	chr13	100834707	100834708	0.0573208	0	1	ENSPANG00000011995; ENSPANG00000008627	0	NA	1	0
chr13_100834729	chr13	100834729	100834730	3.09e-06	0	1	ENSPANG00000011995; ENSPANG00000008627	0	NA	1	0
chr13_121213718	chr13	121213718	121213719	3.9e-05	0	0	NA	0	NA	0	1
chr13_127550470	chr13	127550470	127550471	-0.0659367	0	0	NA	0	NA	0	0
chr13_127718769	chr13	127718769	127718770	5.25e-05	0	0	NA	0	NA	1	1
chr13_127718800	chr13	127718800	127718801	0.014818	0	0	NA	0	NA	1	1
chr13_127718821	chr13	127718821	127718822	0.00954352	0	0	NA	0	NA	1	1
chr13_127718859	chr13	127718859	127718860	0.000700637	0	0	NA	0	NA	0	1
chr13_1426478	chr13	1426478	1426479	0.0134641	0	0	NA	1	ENSPANG00000011149	1	0
chr13_1426480	chr13	1426480	1426481	0.0352908	0	0	NA	1	ENSPANG00000011149	1	0
chr13_1426487	chr13	1426487	1426488	0.00452976	0	0	NA	1	ENSPANG00000011149	1	0
chr13_1426502	chr13	1426502	1426503	0.012424	0	0	NA	1	ENSPANG00000011149	1	0
chr13_26352930	chr13	26352930	26352931	-0.00105085	0	0	NA	1	ENSPANG00000006308	0	0
chr13_30625750	chr13	30625750	30625751	0.0258008	0	0	NA	1	ENSPANG00000025184	1	0
chr13_41481621	chr13	41481621	41481622	3.55e-05	1	0	NA	1	ENSPANG00000006928	1	0
chr13_44157525	chr13	44157525	44157526	2.36e-05	0	0	NA	0	NA	1	0
chr13_61982584	chr13	61982584	61982585	2.2e-06	1	0	NA	0	NA	1	0
chr13_63980925	chr13	63980925	63980926	0.0137244	0	0	NA	0	NA	0	0
chr13_69735806	chr13	69735806	69735807	0.0252104	1	0	NA	1	ENSPANG00000010751	1	0
chr13_71855409	chr13	71855409	71855410	2.68e-07	1	0	NA	1	ENSPANG00000021694	1	0
chr13_73380907	chr13	73380907	73380908	0.000334274	1	0	NA	1	ENSPANG00000011215	1	0
chr13_79970260	chr13	79970260	79970261	0.00398357	0	0	NA	0	NA	0	0
chr13_79975230	chr13	79975230	79975231	0.0161912	0	0	NA	0	NA	0	0
chr13_79976221	chr13	79976221	79976222	7.08e-05	0	0	NA	0	NA	0	0
chr13_87988694	chr13	87988694	87988695	-0.0241027	0	0	NA	1	ENSPANG00000018833	0	0
chr13_88462477	chr13	88462477	88462478	-9.54e-06	1	0	NA	0	NA	1	0
chr13_89811714	chr13	89811714	89811715	-5.05e-05	1	0	NA	0	NA	0	0
chr13_89811723	chr13	89811723	89811724	-1.77e-05	1	0	NA	0	NA	0	0
chr13_90196953	chr13	90196953	90196954	1.16e-05	0	0	NA	1	ENSPANG00000016023	1	1
chr14_102417858	chr14	102417858	102417859	-5.18e-05	0	0	NA	0	NA	0	0
chr14_106143319	chr14	106143319	106143320	0.000514911	0	0	NA	1	ENSPANG00000010674	1	0
chr14_106143321	chr14	106143321	106143322	8.15e-05	0	0	NA	1	ENSPANG00000010674	1	0
chr14_108238252	chr14	108238252	108238253	0.0291759	0	0	NA	1	ENSPANG00000017472	0	1
chr14_119330433	chr14	119330433	119330434	2.87e-05	0	0	NA	1	ENSPANG00000004682	1	0
chr14_1548191	chr14	1548191	1548192	4.13e-05	1	0	NA	1	ENSPANG00000021118	0	0
chr14_1802584	chr14	1802584	1802585	0.000363274	0	0	NA	0	NA	1	0
chr14_20246081	chr14	20246081	20246082	-2.79e-05	0	0	NA	1	ENSPANG00000017380	0	0
chr14_2528874	chr14	2528874	2528875	0.00252423	0	1	ENSPANG00000001386	0	NA	1	0
chr14_32749845	chr14	32749845	32749846	-6.27e-05	1	0	NA	1	ENSPANG00000018409	0	1
chr14_32852981	chr14	32852981	32852982	0.0486539	0	0	NA	0	NA	1	0
chr14_3579429	chr14	3579429	3579430	-0.000140533	0	0	NA	0	NA	0	0
chr14_5330632	chr14	5330632	5330633	0.000155552	0	0	NA	1	ENSPANG00000007008	0	0
chr14_56361511	chr14	56361511	56361512	0.0340622	1	0	NA	0	NA	1	0
chr14_65282211	chr14	65282211	65282212	0.0361049	1	1	ENSPANG00000011141	0	NA	1	1
chr14_66109489	chr14	66109489	66109490	-0.00891253	0	0	NA	0	NA	0	0
chr14_75932562	chr14	75932562	75932563	-8.93e-05	0	0	NA	1	ENSPANG00000019126	0	0
chr14_8337815	chr14	8337815	8337816	-7.61e-06	0	0	NA	1	ENSPANG00000005284	0	1
chr14_8337907	chr14	8337907	8337908	-1.11e-05	1	0	NA	1	ENSPANG00000005284	0	1
chr15_1037847	chr15	1037847	1037848	3.9e-05	0	0	NA	1	ENSPANG00000026291	1	0
chr15_106181280	chr15	106181280	106181281	0.00698111	1	1	ENSPANG00000024641	0	NA	1	0
chr15_106181285	chr15	106181285	106181286	7.71e-05	1	1	ENSPANG00000024641	0	NA	1	0
chr15_1233894	chr15	1233894	1233895	-6.43e-05	0	1	ENSPANG00000026266	0	NA	0	1
chr15_15359077	chr15	15359077	15359078	3.72e-06	0	0	NA	1	ENSPANG00000025809	1	0
chr15_2021245	chr15	2021245	2021246	3.56e-05	1	0	NA	1	ENSPANG00000026121	0	0
chr15_20559498	chr15	20559498	20559499	-0.0170506	0	0	NA	1	ENSPANG00000025786	0	0
chr15_2102833	chr15	2102833	2102834	7.76e-06	0	0	NA	0	NA	0	1
chr15_21668524	chr15	21668524	21668525	0.000120347	0	0	NA	0	NA	0	1
chr15_21668585	chr15	21668585	21668586	0.000424726	0	0	NA	0	NA	0	1
chr15_21668649	chr15	21668649	21668650	4.29e-06	0	0	NA	0	NA	0	1
chr15_2252460	chr15	2252460	2252461	-1.45e-05	0	0	NA	1	ENSPANG00000026123	0	0
chr15_27088225	chr15	27088225	27088226	-3.17e-05	1	0	NA	0	NA	0	0
chr15_36936369	chr15	36936369	36936370	0.0322158	0	0	NA	1	ENSPANG00000025589	1	0
chr15_3858915	chr15	3858915	3858916	0.000139911	0	0	NA	1	ENSPANG00000026102	0	0
chr15_39273332	chr15	39273332	39273333	-0.0476502	0	0	NA	0	NA	0	0
chr15_39273343	chr15	39273343	39273344	-0.0537406	0	0	NA	0	NA	0	0
chr15_39636714	chr15	39636714	39636715	0.034434	0	0	NA	0	NA	0	0
chr15_41657300	chr15	41657300	41657301	1.66e-05	0	0	NA	1	ENSPANG00000004832	1	0
chr15_5135509	chr15	5135509	5135510	-0.0194481	0	0	NA	1	ENSPANG00000026030	0	0
chr15_68416446	chr15	68416446	68416447	2.25e-06	1	0	NA	0	NA	0	1
chr15_68416463	chr15	68416463	68416464	4.16e-05	1	0	NA	0	NA	0	1
chr15_68481010	chr15	68481010	68481011	3.16e-06	1	0	NA	1	ENSPANG00000025177	0	1
chr15_729548	chr15	729548	729549	4.13e-05	0	0	NA	1	ENSPANG00000026436	1	0
chr15_8284254	chr15	8284254	8284255	8.44e-07	0	0	NA	1	ENSPANG00000025958	0	0
chr15_8452757	chr15	8452757	8452758	0.000237369	0	0	NA	0	NA	1	0
chr15_92569	chr15	92569	92570	0.0333716	0	0	NA	1	ENSPANG00000026439	0	0
chr15_96600234	chr15	96600234	96600235	0.000106979	0	0	NA	1	ENSPANG00000024837	0	1
chr15_96603583	chr15	96603583	96603584	0.000122769	0	0	NA	1	ENSPANG00000024837	0	0
chr15_9668271	chr15	9668271	9668272	3.59e-05	0	0	NA	0	NA	1	0
chr15_97487668	chr15	97487668	97487669	7.67e-06	0	0	NA	1	ENSPANG00000024826; ENSPANG00000024825	0	0
chr16_11260166	chr16	11260166	11260167	1.15e-05	0	0	NA	1	ENSPANG00000023767	1	0
chr16_11260168	chr16	11260168	11260169	0.0722367	0	0	NA	1	ENSPANG00000023767	1	0
chr16_175734	chr16	175734	175735	0.0271691	0	0	NA	1	ENSPANG00000024628	0	0
chr16_18939687	chr16	18939687	18939688	-0.0262092	1	0	NA	0	NA	0	0
chr16_18939692	chr16	18939692	18939693	-0.0735683	1	0	NA	0	NA	0	0
chr16_195677	chr16	195677	195678	2.31e-05	0	0	NA	0	NA	0	0
chr16_20328162	chr16	20328162	20328163	1.17e-05	0	0	NA	0	NA	1	0
chr16_20363487	chr16	20363487	20363488	3.23e-06	0	0	NA	0	NA	1	0
chr16_20364577	chr16	20364577	20364578	2.11e-05	0	0	NA	0	NA	0	1
chr16_23013769	chr16	23013769	23013770	1.75e-05	0	0	NA	1	ENSPANG00000023185	1	0
chr16_25678336	chr16	25678336	25678337	0.0539735	1	0	NA	1	ENSPANG00000023030	0	0
chr16_27661735	chr16	27661735	27661736	-0.00013423	0	0	NA	0	NA	0	0
chr16_30055359	chr16	30055359	30055360	-2.75e-05	0	1	ENSPANG00000022886	0	NA	0	0
chr16_39420590	chr16	39420590	39420591	8.21e-07	0	0	NA	1	ENSPANG00000022285	1	0
chr16_40764293	chr16	40764293	40764294	-0.0854316	0	0	NA	1	ENSPANG00000022270	0	0
chr16_43348730	chr16	43348730	43348731	0.0149901	0	0	NA	0	NA	1	0
chr16_45833652	chr16	45833652	45833653	-3.61e-05	0	0	NA	1	ENSPANG00000021987	0	0
chr16_4591850	chr16	4591850	4591851	9.37e-05	1	0	NA	1	ENSPANG00000024324	1	0
chr16_46387972	chr16	46387972	46387973	2.09e-05	0	0	NA	1	ENSPANG00000021825	0	0
chr16_52318973	chr16	52318973	52318974	-0.00010454	0	0	NA	0	NA	0	0
chr16_55377951	chr16	55377951	55377952	0.000259467	0	1	ENSPANG00000021041	0	NA	0	1
chr16_59797487	chr16	59797487	59797488	-1.06e-05	0	0	NA	1	ENSPANG00000020501	0	0
chr16_61073746	chr16	61073746	61073747	3.06e-05	0	0	NA	0	NA	1	0
chr16_65669377	chr16	65669377	65669378	0.0043487	0	0	NA	0	NA	0	0
chr16_65723974	chr16	65723974	65723975	0.0170436	0	0	NA	0	NA	1	0
chr16_66423396	chr16	66423396	66423397	-0.000186428	0	0	NA	0	NA	0	0
chr16_6650858	chr16	6650858	6650859	3.09e-05	0	0	NA	1	ENSPANG00000024252	1	0
chr16_70081846	chr16	70081846	70081847	3.02e-05	1	0	NA	1	ENSPANG00000019854	0	0
chr16_70243033	chr16	70243033	70243034	-1.98e-05	1	0	NA	1	ENSPANG00000010714	0	0
chr16_7121542	chr16	7121542	7121543	0.0159527	1	0	NA	1	ENSPANG00000024096	0	1
chr16_72364543	chr16	72364543	72364544	5.69e-06	0	0	NA	1	ENSPANG00000019599	1	0
chr16_72801719	chr16	72801719	72801720	-0.00313572	0	0	NA	1	ENSPANG00000019486	0	0
chr16_849057	chr16	849057	849058	-1.13e-05	0	0	NA	1	ENSPANG00000024616	0	0
chr17_30938207	chr17	30938207	30938208	3.41e-05	0	0	NA	1	ENSPANG00000007570	1	1
chr17_30938869	chr17	30938869	30938870	0.000347326	0	0	NA	1	ENSPANG00000007570	1	1
chr17_30939641	chr17	30939641	30939642	0.0205735	0	0	NA	1	ENSPANG00000007570	1	1
chr17_30939650	chr17	30939650	30939651	0.0469895	0	0	NA	1	ENSPANG00000007570	1	1
chr17_30940665	chr17	30940665	30940666	0.000595706	0	0	NA	1	ENSPANG00000007570	1	0
chr17_4948054	chr17	4948054	4948055	2.86e-06	0	0	NA	1	ENSPANG00000000263	1	0
chr17_7059913	chr17	7059913	7059914	0.0140953	0	0	NA	0	NA	0	1
chr17_77323943	chr17	77323943	77323944	0.000131301	0	1	ENSPANG00000018055	0	NA	1	0
chr17_77329928	chr17	77329928	77329929	7.02e-05	1	0	NA	0	NA	0	1
chr17_88190351	chr17	88190351	88190352	-0.0228395	0	0	NA	1	ENSPANG00000019938	0	0
chr17_88916933	chr17	88916933	88916934	0.0271626	0	0	NA	0	NA	1	0
chr17_88916945	chr17	88916945	88916946	2.47e-05	0	0	NA	0	NA	1	0
chr17_88916955	chr17	88916955	88916956	0.0204343	0	0	NA	0	NA	1	0
chr17_89384329	chr17	89384329	89384330	-2.53e-06	0	0	NA	0	NA	0	0
chr18_1103356	chr18	1103356	1103357	-0.0050807	0	0	NA	0	NA	0	0
chr18_40865543	chr18	40865543	40865544	0.00879091	0	0	NA	1	ENSPANG00000017087	0	0
chr18_49571688	chr18	49571688	49571689	0.00277168	0	0	NA	1	ENSPANG00000006449	1	0
chr18_49571693	chr18	49571693	49571694	0.000103116	0	0	NA	1	ENSPANG00000006449	1	0
chr18_49571712	chr18	49571712	49571713	0.0309008	0	0	NA	1	ENSPANG00000006449	1	0
chr18_56937338	chr18	56937338	56937339	2.22e-05	0	0	NA	0	NA	0	0
chr18_644151	chr18	644151	644152	2.55e-06	1	0	NA	0	NA	0	0
chr18_71400048	chr18	71400048	71400049	0.023346	0	0	NA	1	ENSPANG00000014019	0	1
chr18_71605364	chr18	71605364	71605365	9.03e-06	0	0	NA	1	ENSPANG00000012831	0	1
chr18_71768386	chr18	71768386	71768387	0.00275523	0	0	NA	0	NA	0	1
chr18_71792533	chr18	71792533	71792534	6.12e-06	0	0	NA	1	ENSPANG00000000968	0	1
chr19_11841095	chr19	11841095	11841096	-2.09e-05	1	0	NA	1	ENSPANG00000018992	0	0
chr19_118914	chr19	118914	118915	2.42e-05	0	0	NA	0	NA	0	0
chr19_12756636	chr19	12756636	12756637	0.00155543	0	0	NA	1	ENSPANG00000009789	0	1
chr19_12756639	chr19	12756639	12756640	0.0225342	0	0	NA	1	ENSPANG00000009789	0	1
chr19_12756672	chr19	12756672	12756673	0.0189553	0	0	NA	1	ENSPANG00000009789	0	1
chr19_12756682	chr19	12756682	12756683	0.0588028	0	0	NA	1	ENSPANG00000009789	0	1
chr19_12756686	chr19	12756686	12756687	0.0442444	0	0	NA	1	ENSPANG00000009789	0	1
chr19_1384596	chr19	1384596	1384597	6.9e-06	0	0	NA	1	ENSPANG00000016063	0	0
chr19_1384610	chr19	1384610	1384611	1.39e-05	0	0	NA	1	ENSPANG00000016063	0	0
chr19_14725775	chr19	14725775	14725776	1.06e-05	0	0	NA	1	ENSPANG00000008105	0	0
chr19_1612796	chr19	1612796	1612797	0.00206612	0	0	NA	1	ENSPANG00000000440	0	0
chr19_17726818	chr19	17726818	17726819	6.47e-05	0	0	NA	0	NA	0	0
chr19_18135423	chr19	18135423	18135424	-0.0287478	0	0	NA	0	NA	1	0
chr19_23382861	chr19	23382861	23382862	0.00556012	0	0	NA	0	NA	1	0
chr19_24899616	chr19	24899616	24899617	-9.74e-06	0	0	NA	1	ENSPANG00000016643	0	0
chr19_2535961	chr19	2535961	2535962	0.0802484	0	0	NA	1	ENSPANG00000006535	0	1
chr19_2840528	chr19	2840528	2840529	8.24e-05	0	0	NA	0	NA	0	0
chr19_2904906	chr19	2904906	2904907	1.72e-05	0	0	NA	0	NA	0	1
chr19_29205290	chr19	29205290	29205291	1.47e-06	0	0	NA	0	NA	1	1
chr19_30756047	chr19	30756047	30756048	1.55e-05	0	0	NA	0	NA	1	1
chr19_31129752	chr19	31129752	31129753	1.61e-06	0	0	NA	1	ENSPANG00000024279	1	0
chr19_33498960	chr19	33498960	33498961	-0.00239868	0	0	NA	0	NA	0	0
chr19_34982021	chr19	34982021	34982022	2.95e-05	0	0	NA	1	ENSPANG00000006681	0	1
chr19_3870333	chr19	3870333	3870334	-5.19e-06	1	0	NA	1	ENSPANG00000010574	0	0
chr19_38839589	chr19	38839589	38839590	2.24e-05	0	0	NA	1	ENSPANG00000008539	1	0
chr19_38839808	chr19	38839808	38839809	5.95e-05	0	0	NA	1	ENSPANG00000008539	1	0
chr19_38839873	chr19	38839873	38839874	0.00118804	0	0	NA	1	ENSPANG00000008539	1	0
chr19_38839888	chr19	38839888	38839889	0.0157632	0	0	NA	1	ENSPANG00000008539	1	0
chr19_38841454	chr19	38841454	38841455	0.0324813	0	1	ENSPANG00000008539	0	NA	0	1
chr19_38948971	chr19	38948971	38948972	0.0199138	1	0	NA	1	ENSPANG00000005403; ENSPANG00000009463	1	0
chr19_39783580	chr19	39783580	39783581	0.0367805	0	1	ENSPANG00000018286	0	NA	1	0
chr19_39949183	chr19	39949183	39949184	0.0661957	0	0	NA	1	ENSPANG00000021672	1	0
chr19_39949196	chr19	39949196	39949197	0.000325489	0	0	NA	1	ENSPANG00000021672	1	0
chr19_40762172	chr19	40762172	40762173	4.4e-05	0	0	NA	1	ENSPANG00000012944	1	0
chr19_41989999	chr19	41989999	41990000	0.00564508	0	0	NA	1	ENSPANG00000022678	0	1
chr19_42064496	chr19	42064496	42064497	2.77e-06	0	0	NA	1	ENSPANG00000015254	0	1
chr19_43677287	chr19	43677287	43677288	0.0136769	0	0	NA	0	NA	0	0
chr19_47045700	chr19	47045700	47045701	-9.61e-06	0	0	NA	1	ENSPANG00000016444	0	0
chr19_4743541	chr19	4743541	4743542	6.49e-05	1	0	NA	1	ENSPANG00000011049	1	1
chr19_48009972	chr19	48009972	48009973	0.0219342	0	0	NA	1	ENSPANG00000001787	0	0
chr19_48360598	chr19	48360598	48360599	0.0149111	0	0	NA	1	ENSPANG00000013748	0	0
chr19_4892245	chr19	4892245	4892246	0.000191551	0	0	NA	1	ENSPANG00000011049	0	0
chr19_4892272	chr19	4892272	4892273	0.000114971	0	0	NA	1	ENSPANG00000011049	0	0
chr19_4892331	chr19	4892331	4892332	0.0183734	0	0	NA	1	ENSPANG00000011049	0	0
chr19_4895283	chr19	4895283	4895284	0.000101784	1	0	NA	1	ENSPANG00000011049	0	1
chr19_49137444	chr19	49137444	49137445	1.04e-05	0	0	NA	0	NA	0	1
chr19_49442528	chr19	49442528	49442529	1.56e-05	0	0	NA	0	NA	1	0
chr19_49610382	chr19	49610382	49610383	0.0250736	0	0	NA	0	NA	1	0
chr19_49881157	chr19	49881157	49881158	1.46e-05	0	0	NA	0	NA	1	0
chr19_49881165	chr19	49881165	49881166	0.01708	0	0	NA	0	NA	1	0
chr19_50393416	chr19	50393416	50393417	4.75e-05	0	0	NA	0	NA	1	0
chr19_50915110	chr19	50915110	50915111	5.86e-05	0	1	ENSPANG00000008310	0	NA	1	0
chr19_51026455	chr19	51026455	51026456	2.06e-05	1	0	NA	1	ENSPANG00000004720	1	0
chr19_51183100	chr19	51183100	51183101	9.36e-06	0	0	NA	1	ENSPANG00000011136	0	1
chr19_51224004	chr19	51224004	51224005	-5.14e-05	0	1	ENSPANG00000014391	0	NA	0	0
chr19_5647175	chr19	5647175	5647176	-0.000378603	0	0	NA	0	NA	0	1
chr19_571206	chr19	571206	571207	-0.000130263	1	0	NA	1	ENSPANG00000012128	0	1
chr19_6425666	chr19	6425666	6425667	-0.0052651	1	0	NA	1	ENSPANG00000023926	0	0
chr19_6934831	chr19	6934831	6934832	-0.00077606	0	0	NA	1	ENSPANG00000022952	0	1
chr19_7670627	chr19	7670627	7670628	0.000285071	0	0	NA	1	ENSPANG00000000283	0	0
chr2_115934844	chr2	115934844	115934845	8.27e-05	0	0	NA	1	ENSPANG00000019098	0	1
chr2_156787622	chr2	156787622	156787623	0.00580006	1	0	NA	1	ENSPANG00000008251	0	0
chr2_184656497	chr2	184656497	184656498	0.0298825	0	0	NA	0	NA	0	0
chr2_184672067	chr2	184672067	184672068	-0.0366529	0	0	NA	0	NA	0	0
chr2_185188190	chr2	185188190	185188191	1.35e-05	0	0	NA	1	ENSPANG00000024946	0	0
chr2_185641929	chr2	185641929	185641930	0.0190413	0	0	NA	0	NA	1	0
chr2_185773515	chr2	185773515	185773516	1.84e-06	0	0	NA	0	NA	0	0
chr2_186521223	chr2	186521223	186521224	-0.0001075	1	0	NA	0	NA	0	1
chr2_29981824	chr2	29981824	29981825	1.49e-05	0	0	NA	0	NA	0	0
chr2_43042384	chr2	43042384	43042385	0.0330901	0	1	ENSPANG00000026370	0	NA	0	1
chr2_43042391	chr2	43042391	43042392	3.27e-05	0	1	ENSPANG00000026370	0	NA	0	1
chr2_45659514	chr2	45659514	45659515	2.52e-05	0	0	NA	1	ENSPANG00000000432	1	0
chr2_61361745	chr2	61361745	61361746	-3.16e-05	0	0	NA	0	NA	0	0
chr2_69964254	chr2	69964254	69964255	4.11e-05	0	0	NA	1	ENSPANG00000024536	1	0
chr2_72412634	chr2	72412634	72412635	3e-07	0	0	NA	1	ENSPANG00000015659	1	0
chr2_76702984	chr2	76702984	76702985	0.000113993	0	0	NA	1	ENSPANG00000020595	1	1
chr2_79726416	chr2	79726416	79726417	1.73e-05	0	0	NA	0	NA	0	0
chr2_82124000	chr2	82124000	82124001	-1.29e-05	1	0	NA	1	ENSPANG00000020233	0	0
chr2_82124025	chr2	82124025	82124026	-0.0296293	1	0	NA	1	ENSPANG00000020233	0	0
chr2_92774604	chr2	92774604	92774605	-0.00452755	0	0	NA	1	ENSPANG00000016563	0	0
chr20_12926283	chr20	12926283	12926284	4.26e-05	0	0	NA	0	NA	0	0
chr20_2096444	chr20	2096444	2096445	0.000154681	0	0	NA	1	ENSPANG00000016969	0	0
chr20_2577597	chr20	2577597	2577598	-2.38e-05	0	0	NA	1	ENSPANG00000006412	0	1
chr20_27573782	chr20	27573782	27573783	-0.0221065	0	0	NA	1	ENSPANG00000017008	0	0
chr20_31737684	chr20	31737684	31737685	0.0191562	0	1	ENSPANG00000009450	0	NA	1	0
chr20_31737697	chr20	31737697	31737698	4.57e-05	0	1	ENSPANG00000009450	0	NA	1	0
chr20_32759824	chr20	32759824	32759825	0.0111418	1	0	NA	0	NA	0	0
chr20_32759839	chr20	32759839	32759840	1.35e-05	1	0	NA	0	NA	0	0
chr20_37425936	chr20	37425936	37425937	0.00022236	0	0	NA	1	ENSPANG00000007155	1	0
chr20_38403425	chr20	38403425	38403426	-0.01205	0	0	NA	1	ENSPANG00000006268	0	0
chr20_423734	chr20	423734	423735	0.0150893	0	0	NA	1	ENSPANG00000000690	0	1
chr20_50482526	chr20	50482526	50482527	2.83e-06	0	0	NA	1	ENSPANG00000020868	1	0
chr20_50482573	chr20	50482573	50482574	0.00461203	0	0	NA	1	ENSPANG00000020868	1	0
chr20_55833230	chr20	55833230	55833231	6.1e-05	0	0	NA	1	ENSPANG00000018041	0	0
chr20_5883969	chr20	5883969	5883970	0.00011287	0	0	NA	0	NA	1	0
chr20_602080	chr20	602080	602081	1.26e-05	1	0	NA	1	ENSPANG00000019981	1	0
chr20_60308585	chr20	60308585	60308586	0.00469924	0	0	NA	0	NA	0	0
chr20_63002845	chr20	63002845	63002846	-3.71e-05	0	0	NA	1	ENSPANG00000018039	0	0
chr20_67109379	chr20	67109379	67109380	-0.000219963	0	0	NA	0	NA	0	0
chr20_70494592	chr20	70494592	70494593	0.000138024	1	0	NA	0	NA	0	0
chr20_70494595	chr20	70494595	70494596	0.000326529	1	0	NA	0	NA	0	0
chr20_70613945	chr20	70613945	70613946	8.84e-06	0	0	NA	1	ENSPANG00000018840	0	1
chr20_70613965	chr20	70613965	70613966	0.000249736	0	0	NA	1	ENSPANG00000018840	0	1
chr20_70894727	chr20	70894727	70894728	-2.72e-05	0	0	NA	1	ENSPANG00000019548	0	0
chr20_958985	chr20	958985	958986	0.0236121	0	0	NA	0	NA	0	0
chr3_102668064	chr3	102668064	102668065	2.86e-05	1	0	NA	0	NA	1	0
chr3_1104611	chr3	1104611	1104612	0.00517882	0	0	NA	0	NA	0	0
chr3_110708613	chr3	110708613	110708614	0.0637952	1	0	NA	1	ENSPANG00000002491	1	0
chr3_110708668	chr3	110708668	110708669	0.0802545	1	0	NA	1	ENSPANG00000002491	1	0
chr3_110708682	chr3	110708682	110708683	1.65e-05	1	0	NA	1	ENSPANG00000002491	1	0
chr3_110708688	chr3	110708688	110708689	0.0733181	1	0	NA	1	ENSPANG00000002491	1	0
chr3_152525153	chr3	152525153	152525154	7.01e-06	0	0	NA	1	ENSPANG00000015615	1	0
chr3_152525322	chr3	152525322	152525323	0.0471517	0	1	ENSPANG00000015615	0	NA	0	1
chr3_152710599	chr3	152710599	152710600	-0.00590791	1	0	NA	0	NA	0	0
chr3_170949460	chr3	170949460	170949461	0.010604	0	0	NA	0	NA	1	0
chr3_170949484	chr3	170949484	170949485	0.00449157	0	0	NA	0	NA	1	0
chr3_171600582	chr3	171600582	171600583	0.00919774	0	0	NA	1	ENSPANG00000023420	1	0
chr3_175125090	chr3	175125090	175125091	0.00367683	0	0	NA	0	NA	1	0
chr3_175125092	chr3	175125092	175125093	0.000185508	0	0	NA	0	NA	1	0
chr3_175299514	chr3	175299514	175299515	3.05e-05	0	0	NA	0	NA	1	0
chr3_2493529	chr3	2493529	2493530	6.36e-06	0	0	NA	0	NA	0	0
chr3_34598170	chr3	34598170	34598171	0.0270123	0	0	NA	1	ENSPANG00000025002	0	1
chr3_35063151	chr3	35063151	35063152	7.15e-06	0	0	NA	0	NA	0	1
chr3_35661259	chr3	35661259	35661260	1.72e-05	0	0	NA	0	NA	0	0
chr3_38545723	chr3	38545723	38545724	0.00430231	0	0	NA	1	ENSPANG00000015584	1	1
chr3_42022142	chr3	42022142	42022143	2.1e-05	0	1	ENSPANG00000006305	0	NA	1	1
chr3_42651143	chr3	42651143	42651144	-0.0602913	0	0	NA	0	NA	0	0
chr3_46295538	chr3	46295538	46295539	-4.51e-05	0	0	NA	0	NA	0	0
chr3_49952374	chr3	49952374	49952375	0.01006	0	0	NA	0	NA	1	0
chr3_49953026	chr3	49953026	49953027	6.99e-06	0	0	NA	0	NA	1	0
chr3_52731493	chr3	52731493	52731494	1.09e-06	0	0	NA	0	NA	1	0
chr3_54787453	chr3	54787453	54787454	3.84e-05	0	0	NA	0	NA	1	0
chr3_56747346	chr3	56747346	56747347	0.00192002	0	0	NA	1	ENSPANG00000022185	1	1
chr3_65454052	chr3	65454052	65454053	0.058723	0	0	NA	1	ENSPANG00000016470	1	0
chr3_75386442	chr3	75386442	75386443	-0.0403164	0	0	NA	1	ENSPANG00000023287	0	1
chr3_75386456	chr3	75386456	75386457	-0.0271917	0	0	NA	1	ENSPANG00000023287	0	1
chr3_86121190	chr3	86121190	86121191	4.19e-05	0	0	NA	1	ENSPANG00000019047	0	0
chr3_90116928	chr3	90116928	90116929	7.62e-05	0	0	NA	1	ENSPANG00000023061	1	1
chr3_9852361	chr3	9852361	9852362	0.00895254	0	0	NA	1	ENSPANG00000020491	1	0
chr4_100371431	chr4	100371431	100371432	0.000161038	0	0	NA	0	NA	1	0
chr4_100371605	chr4	100371605	100371606	1.04e-05	0	0	NA	0	NA	1	0
chr4_10803177	chr4	10803177	10803178	0.0574699	0	1	ENSPANG00000026314	0	NA	1	0
chr4_10803247	chr4	10803247	10803248	3.37e-05	0	1	ENSPANG00000026314	0	NA	1	0
chr4_108285390	chr4	108285390	108285391	0.0277776	0	0	NA	1	ENSPANG00000005833	1	0
chr4_112542804	chr4	112542804	112542805	0.012335	0	0	NA	1	ENSPANG00000024446	1	0
chr4_112542999	chr4	112542999	112543000	0.00452435	0	0	NA	1	ENSPANG00000024446	1	0
chr4_112543017	chr4	112543017	112543018	0.0256956	0	0	NA	1	ENSPANG00000024446	1	0
chr4_112543042	chr4	112543042	112543043	1.35e-05	0	0	NA	1	ENSPANG00000024446	1	0
chr4_112543080	chr4	112543080	112543081	0.0357205	0	0	NA	1	ENSPANG00000024446	1	0
chr4_112543179	chr4	112543179	112543180	2.81e-05	0	0	NA	1	ENSPANG00000024446	1	0
chr4_112543197	chr4	112543197	112543198	3.01e-05	0	0	NA	1	ENSPANG00000024446	1	0
chr4_112664138	chr4	112664138	112664139	6.81e-06	0	0	NA	1	ENSPANG00000023242	1	0
chr4_112664372	chr4	112664372	112664373	1.44e-05	0	0	NA	1	ENSPANG00000023242	1	0
chr4_112664678	chr4	112664678	112664679	3.97e-05	0	0	NA	1	ENSPANG00000023242	1	0
chr4_112664700	chr4	112664700	112664701	2.81e-05	0	0	NA	1	ENSPANG00000023242	1	0
chr4_13950895	chr4	13950895	13950896	1.9e-05	0	0	NA	0	NA	0	0
chr4_152287496	chr4	152287496	152287497	5e-05	0	0	NA	1	ENSPANG00000008203	1	0
chr4_152287531	chr4	152287531	152287532	7.53e-07	0	0	NA	1	ENSPANG00000008203	1	0
chr4_152942384	chr4	152942384	152942385	-2.53e-05	0	0	NA	0	NA	0	0
chr4_164925734	chr4	164925734	164925735	0.0694597	1	0	NA	1	ENSPANG00000006376	1	0
chr4_26874649	chr4	26874649	26874650	3.64e-05	0	0	NA	0	NA	0	0
chr4_31274248	chr4	31274248	31274249	-5.23e-06	0	0	NA	0	NA	0	0
chr4_31440571	chr4	31440571	31440572	3.77e-05	1	0	NA	1	ENSPANG00000020094; ENSPANG00000000761	1	1
chr4_31440577	chr4	31440577	31440578	0.00010024	1	0	NA	1	ENSPANG00000020094; ENSPANG00000000761	1	1
chr4_40867046	chr4	40867046	40867047	3.6e-05	0	0	NA	0	NA	0	0
chr4_43176668	chr4	43176668	43176669	-0.000208444	1	0	NA	0	NA	0	0
chr4_45972304	chr4	45972304	45972305	5.11e-05	0	1	ENSPANG00000005761	0	NA	1	0
chr4_66206731	chr4	66206731	66206732	1.55e-05	0	0	NA	0	NA	0	0
chr4_6718462	chr4	6718462	6718463	-0.0429481	1	0	NA	0	NA	0	0
chr5_173522080	chr5	173522080	173522081	-2.43e-06	1	0	NA	1	ENSPANG00000013763	0	0
chr5_1853017	chr5	1853017	1853018	0.0135741	1	0	NA	1	ENSPANG00000008521	0	0
chr5_19553177	chr5	19553177	19553178	0.0414488	0	0	NA	1	ENSPANG00000010364	1	0
chr5_31169688	chr5	31169688	31169689	0.0386123	0	0	NA	0	NA	0	0
chr5_443336	chr5	443336	443337	3.65e-05	0	0	NA	0	NA	0	0
chr5_4553434	chr5	4553434	4553435	7.05e-05	0	1	ENSPANG00000013335	0	NA	1	1
chr5_55734	chr5	55734	55735	9.54e-05	0	0	NA	0	NA	0	0
chr5_852327	chr5	852327	852328	6.47e-05	0	0	NA	1	ENSPANG00000019575	1	0
chr6_1183153	chr6	1183153	1183154	5.03e-05	1	0	NA	1	ENSPANG00000014387	0	0
chr6_126392270	chr6	126392270	126392271	1.85e-05	0	0	NA	1	ENSPANG00000007085	1	0
chr6_127306714	chr6	127306714	127306715	-0.0257719	0	0	NA	0	NA	0	0
chr6_129049363	chr6	129049363	129049364	-0.000475071	1	0	NA	0	NA	0	0
chr6_134371563	chr6	134371563	134371564	0.00035207	0	0	NA	0	NA	1	0
chr6_134371593	chr6	134371593	134371594	0.00327934	0	0	NA	0	NA	1	0
chr6_134386724	chr6	134386724	134386725	2.47e-06	0	0	NA	1	ENSPANG00000008307	1	0
chr6_134427947	chr6	134427947	134427948	0.00219375	0	0	NA	0	NA	1	0
chr6_134628069	chr6	134628069	134628070	0.000211252	0	0	NA	1	ENSPANG00000014179	1	0
chr6_139469017	chr6	139469017	139469018	-0.0579214	0	0	NA	1	ENSPANG00000007890	0	1
chr6_139469066	chr6	139469066	139469067	-0.064189	0	0	NA	1	ENSPANG00000007890	0	1
chr6_14506361	chr6	14506361	14506362	0.0419784	0	0	NA	0	NA	0	0
chr6_145458316	chr6	145458316	145458317	3.75e-05	0	0	NA	0	NA	1	0
chr6_166047059	chr6	166047059	166047060	0.000725942	0	0	NA	1	ENSPANG00000001624	1	0
chr6_166060531	chr6	166060531	166060532	1.92e-05	0	0	NA	1	ENSPANG00000001624	1	0
chr6_166060641	chr6	166060641	166060642	0.000721116	0	0	NA	1	ENSPANG00000001624	1	0
chr6_166060649	chr6	166060649	166060650	0.0600252	0	0	NA	1	ENSPANG00000001624	1	0
chr6_166060936	chr6	166060936	166060937	0.000118124	0	0	NA	1	ENSPANG00000001624	1	0
chr6_166060968	chr6	166060968	166060969	3.65e-05	0	0	NA	1	ENSPANG00000001624	1	0
chr6_168991851	chr6	168991851	168991852	-1.36e-05	0	0	NA	0	NA	0	0
chr6_169142649	chr6	169142649	169142650	0.0359048	0	0	NA	0	NA	1	0
chr6_169142651	chr6	169142651	169142652	0.0563962	0	0	NA	0	NA	1	0
chr6_171620661	chr6	171620661	171620662	-0.0004532	0	0	NA	0	NA	0	0
chr6_172402604	chr6	172402604	172402605	2.11e-05	0	0	NA	1	ENSPANG00000005312	0	0
chr6_2566135	chr6	2566135	2566136	4.69e-06	0	1	ENSPANG00000003730; ENSPANG00000004028	1	ENSPANG00000003730	1	0
chr6_28250914	chr6	28250914	28250915	6.35e-06	0	0	NA	0	NA	0	0
chr6_4457936	chr6	4457936	4457937	-0.0377103	0	0	NA	0	NA	0	0
chr6_6443801	chr6	6443801	6443802	-3e-05	0	0	NA	0	NA	0	0
chr6_70366058	chr6	70366058	70366059	-0.0112975	0	0	NA	1	ENSPANG00000014041	0	0
chr7_129318908	chr7	129318908	129318909	6.21e-05	0	0	NA	1	ENSPANG00000009728	0	0
chr7_129318913	chr7	129318913	129318914	0.0620323	0	0	NA	1	ENSPANG00000009728	0	0
chr7_129318927	chr7	129318927	129318928	0.0385784	0	0	NA	1	ENSPANG00000009728	0	0
chr7_149048597	chr7	149048597	149048598	0.0176489	0	0	NA	1	ENSPANG00000016351	1	0
chr7_149048623	chr7	149048623	149048624	1.46e-05	0	0	NA	1	ENSPANG00000016351	1	0
chr7_155404570	chr7	155404570	155404571	2.27e-05	0	0	NA	1	ENSPANG00000004313	0	0
chr7_157373184	chr7	157373184	157373185	-7.93e-06	0	0	NA	0	NA	0	0
chr7_159097294	chr7	159097294	159097295	5.53e-05	1	0	NA	1	ENSPANG00000018050	0	0
chr7_159296347	chr7	159296347	159296348	0.0075779	0	0	NA	0	NA	1	0
chr7_159330772	chr7	159330772	159330773	4.07e-05	0	0	NA	1	ENSPANG00000016599	1	0
chr7_16062621	chr7	16062621	16062622	5.9e-05	1	0	NA	1	ENSPANG00000018852	1	0
chr7_25661678	chr7	25661678	25661679	0.00579443	0	0	NA	0	NA	0	0
chr7_25661725	chr7	25661725	25661726	1.31e-05	0	0	NA	0	NA	0	0
chr7_39343100	chr7	39343100	39343101	0.0098985	0	0	NA	1	ENSPANG00000007309	1	0
chr7_41464089	chr7	41464089	41464090	-0.0911422	1	0	NA	1	ENSPANG00000016627	0	0
chr7_41464159	chr7	41464159	41464160	-0.00061502	1	0	NA	1	ENSPANG00000016627	0	0
chr7_41464208	chr7	41464208	41464209	-0.00808652	1	0	NA	1	ENSPANG00000016627	0	0
chr7_41464216	chr7	41464216	41464217	-0.0234599	1	0	NA	1	ENSPANG00000016627	0	0
chr7_44598173	chr7	44598173	44598174	-2.03e-05	1	0	NA	0	NA	0	0
chr7_44877586	chr7	44877586	44877587	4.36e-06	0	0	NA	0	NA	0	0
chr7_44877611	chr7	44877611	44877612	8.35e-06	0	0	NA	0	NA	0	0
chr7_48826204	chr7	48826204	48826205	-2.32e-05	0	0	NA	1	ENSPANG00000016014	0	0
chr7_51475914	chr7	51475914	51475915	-8.96e-05	1	1	ENSPANG00000015861	0	NA	0	0
chr7_51565084	chr7	51565084	51565085	0.0504733	1	0	NA	0	NA	0	0
chr7_6154590	chr7	6154590	6154591	2.56e-05	1	0	NA	1	ENSPANG00000019999	0	0
chr7_6281067	chr7	6281067	6281068	7.04e-06	0	0	NA	1	ENSPANG00000019951	1	0
chr7_6281084	chr7	6281084	6281085	7.92e-05	0	0	NA	1	ENSPANG00000019951	1	0
chr7_6281100	chr7	6281100	6281101	0.0248124	0	0	NA	1	ENSPANG00000019951	1	0
chr7_6281106	chr7	6281106	6281107	0.0153632	0	0	NA	1	ENSPANG00000019951	1	0
chr7_6281136	chr7	6281136	6281137	0.000173276	0	0	NA	1	ENSPANG00000019951	1	0
chr7_6281284	chr7	6281284	6281285	5.38e-05	0	0	NA	1	ENSPANG00000019951	1	0
chr7_6281673	chr7	6281673	6281674	7.11e-06	0	0	NA	1	ENSPANG00000019951	1	0
chr7_6281681	chr7	6281681	6281682	0.0323398	0	0	NA	1	ENSPANG00000019951	1	0
chr7_64739972	chr7	64739972	64739973	0.0100062	0	0	NA	0	NA	0	0
chr7_72323887	chr7	72323887	72323888	2.72e-05	0	0	NA	1	ENSPANG00000020922	1	0
chr7_73301098	chr7	73301098	73301099	0.000136283	1	0	NA	0	NA	1	0
chr7_79626197	chr7	79626197	79626198	0.00606721	0	0	NA	1	ENSPANG00000011738	1	0
chr7_85467976	chr7	85467976	85467977	2.66e-05	0	0	NA	1	ENSPANG00000020365	0	1
chr7_85469300	chr7	85469300	85469301	0.0112156	0	0	NA	1	ENSPANG00000020365	1	0
chr7_85469856	chr7	85469856	85469857	3.23e-05	0	0	NA	1	ENSPANG00000020365	1	0
chr7_93082283	chr7	93082283	93082284	2.01e-05	0	0	NA	1	ENSPANG00000000932	1	0
chr7_94037796	chr7	94037796	94037797	8.08e-06	0	0	NA	0	NA	1	0
chr7_9642323	chr7	9642323	9642324	-2.26e-05	0	0	NA	0	NA	0	0
chr8_138548582	chr8	138548582	138548583	0.000239622	0	0	NA	1	ENSPANG00000005939	1	0
chr8_139099585	chr8	139099585	139099586	0.0023803	0	1	ENSPANG00000007684; ENSPANG00000024704	0	NA	1	0
chr8_139099600	chr8	139099600	139099601	0.0197408	0	1	ENSPANG00000007684; ENSPANG00000024704	0	NA	1	0
chr8_139099690	chr8	139099690	139099691	0.000181915	0	1	ENSPANG00000007684; ENSPANG00000024704	1	ENSPANG00000007684	1	0
chr8_139099697	chr8	139099697	139099698	0.0304712	0	1	ENSPANG00000007684; ENSPANG00000024704	1	ENSPANG00000007684	1	0
chr8_1756963	chr8	1756963	1756964	-2.49e-05	0	0	NA	0	NA	0	0
chr8_20641278	chr8	20641278	20641279	1.25e-05	1	0	NA	1	ENSPANG00000019015	1	0
chr8_20641311	chr8	20641311	20641312	0.00614055	1	0	NA	1	ENSPANG00000019015	1	0
chr8_24464805	chr8	24464805	24464806	-4.16e-05	0	0	NA	0	NA	0	0
chr8_25402437	chr8	25402437	25402438	-3.29e-05	1	0	NA	0	NA	0	0
chr8_40151119	chr8	40151119	40151120	3.48e-05	0	0	NA	0	NA	0	0
chr8_43154790	chr8	43154790	43154791	-8.12e-05	0	0	NA	0	NA	0	0
chr8_43154810	chr8	43154810	43154811	-0.0433112	0	0	NA	0	NA	0	0
chr8_4661	chr8	4661	4662	2.03e-05	0	0	NA	0	NA	0	0
chr8_4862326	chr8	4862326	4862327	-0.0224236	0	0	NA	0	NA	0	0
chr8_62124317	chr8	62124317	62124318	6.17e-05	0	0	NA	1	ENSPANG00000005410	0	1
chr8_6728369	chr8	6728369	6728370	3.44e-05	0	0	NA	0	NA	0	0
chr8_6808106	chr8	6808106	6808107	2.77e-06	0	0	NA	0	NA	1	0
chr8_6808125	chr8	6808125	6808126	2.83e-05	0	0	NA	0	NA	1	0
chr8_6808127	chr8	6808127	6808128	3.53e-05	0	0	NA	0	NA	1	0
chr8_6808201	chr8	6808201	6808202	0.0344896	0	0	NA	0	NA	1	0
chr8_6808403	chr8	6808403	6808404	0.00346205	0	0	NA	0	NA	1	0
chr8_6808410	chr8	6808410	6808411	0.00820683	0	0	NA	0	NA	1	0
chr8_6808456	chr8	6808456	6808457	2.31e-05	0	0	NA	0	NA	1	0
chr8_798884	chr8	798884	798885	1.37e-05	0	0	NA	0	NA	0	1
chr9_110967678	chr9	110967678	110967679	2.92e-05	0	0	NA	1	ENSPANG00000020570	0	0
chr9_116139655	chr9	116139655	116139656	2.8e-05	0	0	NA	1	ENSPANG00000020332	0	0
chr9_116139661	chr9	116139661	116139662	0.000404994	0	0	NA	1	ENSPANG00000020332	0	0
chr9_116143515	chr9	116143515	116143516	0.00512444	0	0	NA	1	ENSPANG00000020332	0	0
chr9_116143748	chr9	116143748	116143749	0.000550312	1	0	NA	1	ENSPANG00000020332	0	0
chr9_118828144	chr9	118828144	118828145	-0.0321803	0	0	NA	1	ENSPANG00000020237	0	0
chr9_123744424	chr9	123744424	123744425	-4.37e-06	0	0	NA	1	ENSPANG00000020132	0	0
chr9_124611981	chr9	124611981	124611982	0.0182478	0	0	NA	1	ENSPANG00000020150; ENSPANG00000020149	1	1
chr9_124611985	chr9	124611985	124611986	0.00709589	0	0	NA	1	ENSPANG00000020150; ENSPANG00000020149	1	1
chr9_1763128	chr9	1763128	1763129	0.00168193	0	0	NA	0	NA	0	0
chr9_1763214	chr9	1763214	1763215	3.04e-05	0	0	NA	0	NA	0	0
chr9_1763270	chr9	1763270	1763271	0.00558947	0	0	NA	0	NA	0	0
chr9_3211827	chr9	3211827	3211828	0.00180076	0	0	NA	1	ENSPANG00000023537	1	0
chr9_452569	chr9	452569	452570	0.0210652	0	0	NA	0	NA	0	0
chr9_50869300	chr9	50869300	50869301	-0.0183638	0	0	NA	0	NA	0	0
chr9_53555735	chr9	53555735	53555736	-1.96e-05	0	0	NA	0	NA	0	0
chr9_572605	chr9	572605	572606	0.0126021	0	0	NA	1	ENSPANG00000023553	1	0
chr9_572656	chr9	572656	572657	5.17e-05	0	0	NA	1	ENSPANG00000023553	1	0
chr9_572671	chr9	572671	572672	1.03e-05	0	0	NA	1	ENSPANG00000023553	1	0
chr9_572770	chr9	572770	572771	0.000985227	0	0	NA	1	ENSPANG00000023553	1	0
chr9_572818	chr9	572818	572819	0.000121363	0	0	NA	1	ENSPANG00000023553	1	0
chr9_572860	chr9	572860	572861	0.00205456	0	0	NA	1	ENSPANG00000023553	1	0
chr9_572871	chr9	572871	572872	0.000435456	0	0	NA	1	ENSPANG00000023553	1	0
chr9_573230	chr9	573230	573231	0.023992	0	0	NA	1	ENSPANG00000023553	1	0
chr9_81307789	chr9	81307789	81307790	1.44e-05	1	1	ENSPANG00000003360	0	NA	0	1
chr9_93521748	chr9	93521748	93521749	-0.0150538	0	0	NA	0	NA	0	0
chr9_93521865	chr9	93521865	93521866	-0.0138536	0	0	NA	0	NA	0	0
chr9_96163854	chr9	96163854	96163855	0.00326909	1	0	NA	0		0	0
