# Supplementary material for: High social status males experience accelerated epigenetic aging in wild baboons
Source: eLife journal article supplement (doi:10.7554/elife.66128), 2021-04-05
Supplement: supp [file elife-66128-supp-v1.zip › elife_poa_e66128_Supplementary_file_3.xlsx]

## Sheet: Supplementary Table 3
CpG_site	Male age effect (beta)	Female age effect (beta)	Pvalue male age effect	Pvalue female age effect
chr1_116642037	0.2625	0.1689	2.44532e-07	0.00512352
chr1_125165468	0.443	0.1576	6.66134e-16	0.00568276
chr1_12867884	0.26	0.2762	0.0016297	0.0023333
chr1_129019578	-0.3925	-0.3079	5.74414e-08	0.000127056
chr1_134107974	0.265	0.2734	2.553e-05	0.00100736
chr1_137384645	0.3039	0.2497	8.15011e-06	0.000771525
chr1_13794123	0.1317	0.1064	0.0101512	0.0425679
chr1_147993965	0.3443	0.345	3.29144e-06	2.09014e-05
chr1_152409068	-0.3478	-0.2717	2.83516e-07	0.000145177
chr1_1619131	0.5627	0.3323	5.10703e-15	3.05227e-06
chr1_181580606	0.2601	0.1829	3.90066e-06	0.00223274
chr1_190730999	0.3618	0.2722	7.71154e-05	0.00557233
chr1_190731006	0.3012	0.2647	0.00160146	0.00849629
chr1_190731010	0.3325	0.2792	0.00024688	0.00466066
chr1_207036	0.4077	0.2564	1.17439e-12	3.5421e-05
chr1_20704997	0.1071	0.1666	0.0247064	0.00104555
chr1_219620523	0.3002	0.2852	1.34698e-05	1.00892e-05
chr1_2247100	0.0544	0.1048	0.125187	0.00853909
chr1_24033287	-0.4329	-0.5229	3.68574e-05	2.46783e-06
chr1_34481828	0.2019	0.1367	0.00470887	0.0601543
chr1_38367522	-0.2026	-0.5594	0.0385085	1.20707e-05
chr1_38702364	-0.2415	-0.2907	0.000431483	2.87322e-05
chr1_40040628	0.2861	0.1533	6.60729e-11	0.0014351
chr1_40040637	0.2798	0.1318	3.26974e-10	0.0123637
chr1_49630	0.1542	0.4352	0.113385	1.09981e-05
chr1_5221985	0.2789	0.2886	2.15873e-05	0.000279067
chr1_5222043	0.3481	0.206	7.75096e-09	0.00184607
chr1_56996806	0.1212	0.3322	0.0843702	4.97191e-06
chr1_58676995	-0.2182	-0.248	2.42056e-05	2.59059e-06
chr1_5925344	-0.1683	-0.2477	0.000545972	6.36954e-06
chr1_60865125	0.02514	0.3461	0.739323	0.000288622
chr1_60865158	0.2569	0.4084	0.0147967	0.00485895
chr1_6086819	0.202	0.2465	0.00219707	0.000234978
chr1_6773954	-0.4272	-0.2741	2.55253e-10	0.000255436
chr1_85893175	0.2883	0.2373	1.58067e-08	7.44865e-05
chr1_8814726	0.1877	0.128	0.0604954	0.216346
chr1_8867206	-0.2907	-0.3399	2.44226e-06	1.9288e-06
chr1_8867292	-0.2784	-0.4783	0.000729192	4.35795e-06
chr1_91400940	0.3536	0.3132	4.8987e-10	1.00394e-06
chr1_9444285	0.08424	0.232	0.124356	0.000662296
chr1_9444380	0.07391	0.1497	0.128568	0.00455333
chr10_1313843	0.1648	0.1851	0.0208434	0.0123316
chr10_13625011	-0.3621	-0.31	6.64468e-13	6.05055e-07
chr10_15811325	-0.2667	-0.3049	1.32292e-06	2.28928e-06
chr10_18215097	0.2801	0.2298	2.39691e-06	0.000286972
chr10_18215140	0.2588	0.2417	5.40497e-08	3.93948e-06
chr10_18215152	0.2003	0.1897	0.000206236	0.00420461
chr10_18215202	0.1488	0.2399	0.0331189	0.00464578
chr10_18215247	0.1456	0.2527	0.0104841	0.00106096
chr10_18215356	0.1705	0.1813	8.22629e-05	0.000131108
chr10_18215396	0.0864	0.2158	0.102319	0.000140032
chr10_18246776	0.3567	0.473	1.51177e-05	1.2051e-07
chr10_1841647	0.1447	0.1835	0.0806906	0.0398231
chr10_1907881	-0.3057	-0.2066	4.60205e-09	0.000168521
chr10_231979	0.2537	0.2189	8.08956e-08	6.96782e-05
chr10_232126	0.2081	0.1919	8.82277e-05	0.000702141
chr10_2568363	0.1757	0.1808	0.00679491	0.0286542
chr10_27303616	0.2787	0.2532	3.48237e-07	3.14585e-05
chr10_30449990	0.3045	0.2466	2.77719e-06	0.00037322
chr10_32097198	-0.01757	-0.2481	0.805161	0.0018053
chr10_32646423	-0.1174	-0.2402	0.00936917	1.31148e-06
chr10_4710051	0.2129	0.332	0.00487266	6.98663e-05
chr10_53084796	0.2483	0.2219	0.0008987	0.00115264
chr10_5599934	-0.1769	-0.3403	0.00894862	2.5083e-05
chr10_58203953	-0.04249	0.1967	0.389908	0.00026093
chr10_62597144	0.425	0.336	1.85239e-08	6.73515e-05
chr10_64960804	-0.05382	-0.3263	0.492774	0.00120463
chr10_6592196	0.06105	0.1935	0.257284	0.00153104
chr10_6626451	-0.004655	0.1537	0.934783	0.0349855
chr10_69876120	0.09764	0.1998	0.11722	0.00662586
chr10_70994705	0.3143	0.2086	9.29178e-05	0.015935
chr10_70994715	0.2245	0.1852	0.0032678	0.0430584
chr10_71868892	0.2849	0.2076	8.85286e-08	0.00349245
chr10_72222609	0.1625	0.1166	0.00409721	0.0637547
chr10_7373363	-0.2933	-0.3695	0.000120427	3.02705e-06
chr10_76782714	0.1757	0.2454	0.000819262	1.31256e-05
chr10_76782787	0.2185	0.1859	5.93327e-07	0.000306655
chr10_78350730	0.08857	0.2279	0.0713124	8.0794e-05
chr10_78350949	0.2241	0.2236	2.85601e-05	0.000106045
chr10_78350969	0.2821	0.3715	1.36758e-06	2.35051e-10
chr10_80276317	0.03383	0.3008	0.534017	2.2928e-05
chr10_81860532	-0.09471	-0.2687	0.0383608	2.7328e-05
chr10_86227247	-0.09193	-0.3109	0.16445	0.000208393
chr10_88716219	-0.3867	-0.2614	3.86358e-14	5.55653e-06
chr11_113892960	0.1868	0.124	3.49228e-07	0.00423858
chr11_118840944	0.2394	0.177	0.000278358	0.012943
chr11_120997249	-0.2865	-0.4569	0.00254579	6.56672e-06
chr11_120997262	-0.2521	-0.4636	0.00982976	8.66095e-06
chr11_12127486	0.04642	0.1073	0.322065	0.0430144
chr11_121310185	0.235	0.3053	0.00305619	0.000481043
chr11_123858670	0.1261	0.3021	0.064968	0.000542579
chr11_129353889	0.3141	0.3405	1.56012e-07	1.26886e-06
chr11_129678568	-0.1658	-0.3077	0.00397964	3.49394e-06
chr11_130451934	0.1442	0.2697	0.0383631	0.00073601
chr11_130451967	0.08631	0.2103	0.217687	0.00318581
chr11_131305129	-0.3675	-0.4552	4.02034e-05	0.000417387
chr11_25721084	-0.2626	-0.2553	2.83416e-06	4.19047e-05
chr11_3351573	-0.3703	-0.2788	1.54683e-09	3.01511e-06
chr11_34202021	0.3349	0.3844	7.82499e-05	7.17396e-06
chr11_34746026	-0.004005	0.0541	0.915404	0.113573
chr11_34751216	-0.09201	-0.02234	0	0.0280368
chr11_45362630	0.3144	0.1896	1.83603e-09	0.000990709
chr11_47866287	-0.008831	0.2744	0.917233	0.0137649
chr11_47866382	-0.03558	0.1625	0.570313	0.0158876
chr11_49978641	-0.2341	-0.4221	0.00481055	5.75985e-07
chr11_5523054	0.3437	0.3189	3.63795e-07	3.57307e-06
chr11_5523071	0.3025	0.2224	3.05149e-08	0.000113921
chr11_5523078	0.3401	0.2388	5.42485e-09	5.56124e-05
chr11_6642124	0.2804	0.3804	2.10062e-05	1.5764e-06
chr11_84575841	-0.1325	-0.2365	0.0778991	0.00363769
chr12_101075735	-0.4375	-0.4219	2.6492e-05	0.00431522
chr12_101075747	-0.4973	-0.4379	6.74569e-07	0.000950052
chr12_103587934	0.1278	0.1043	0.00385654	0.0374212
chr12_103637174	0.1942	0.1841	0.000496557	0.0131011
chr12_18271948	0.4449	0.348	1.15169e-10	1.1818e-06
chr12_18271956	0.2924	0.2488	1.37854e-07	0.000117568
chr12_32667279	0.2606	0.1985	2.53941e-07	0.000354492
chr12_36501784	-0.2715	-0.175	3.03091e-14	2.81782e-06
chr12_38014396	0.2692	0.2137	5.03349e-05	0.00194964
chr12_38104333	0.275	0.3995	0.000602117	7.15126e-06
chr12_38104339	0.2034	0.3595	0.00683866	4.02975e-05
chr12_38121687	0.2271	0.2971	0.00473725	8.55635e-05
chr12_80691087	0.2592	0.3496	2.69108e-05	1.58068e-07
chr12_80928967	-0.235	-0.33	0.00538257	0.000620768
chr12_83487486	0.4189	0.3074	3.71897e-10	9.12556e-06
chr12_94231951	0.2367	0.3061	0.000530987	6.8356e-06
chr12_98866577	-0.236	-0.2062	7.57595e-07	6.76189e-05
chr13_100834707	0.2953	0.3704	6.54105e-05	2.28428e-06
chr13_100834729	0.4756	0.3919	9.66618e-07	0.000142791
chr13_121213718	0.4616	0.3551	5.16281e-06	0.00205606
chr13_127550470	-0.2633	-0.2493	1.96287e-13	1.9759e-08
chr13_127718769	0.1255	0.06089	1.02029e-12	0.000721049
chr13_127718800	0.03876	0.0322	0.000425326	0.00444525
chr13_127718821	0.03453	0.01345	0.0169304	0.383327
chr13_127718859	0.08926	0.0245	1.54208e-09	0.102132
chr13_1426478	0.1129	0.1546	0.00885292	0.00225935
chr13_1426480	0.133	0.1638	0.00532355	0.0010281
chr13_1426487	0.07639	0.1463	0.0854553	0.00229198
chr13_1426502	0.09939	0.2003	0.0460357	0.000157987
chr13_26352930	-0.2595	-0.3198	1.95731e-05	1.32733e-06
chr13_30625750	0.3349	0.2624	3.60171e-09	3.8544e-06
chr13_41481621	0.2578	0.2564	7.57117e-05	0.000420279
chr13_44157525	0.3199	0.2926	9.13646e-09	3.28019e-05
chr13_61982584	0.309	0.2823	7.58081e-09	2.67277e-07
chr13_63980925	0.4036	0.3491	2.25041e-08	2.75293e-05
chr13_69735806	0.2509	0.1845	1.7379e-09	2.11655e-05
chr13_71855409	0.2079	0.2279	0.000512496	0.000433217
chr13_73380907	0.3254	0.2223	3.72901e-10	9.82907e-05
chr13_79970260	-0.02811	0.03761	0.285349	0.183835
chr13_79975230	0.05971	0.0136	0.00486537	0.528268
chr13_79976221	0.07623	0.03863	0.0131013	0.161917
chr13_87988694	-0.1381	-0.3396	0.0585327	0.000183367
chr13_88462477	-0.4164	-0.3117	2.15767e-08	0.00050477
chr13_89811714	-0.1638	-0.3686	0.0355886	0.00019716
chr13_89811723	-0.2057	-0.3677	0.00330927	1.83811e-06
chr13_90196953	0.304	0.1512	8.62504e-06	0.0418595
chr14_102417858	-0.442	-0.3098	5.47853e-11	2.4916e-05
chr14_106143321	0.3926	0.2447	5.07746e-06	0.00750186
chr14_108238252	0.2865	0.2064	1.44402e-06	0.000838563
chr14_119330433	0.4177	0.3755	1.60584e-07	6.52948e-06
chr14_1548191	0.2654	0.2818	0.00052833	0.000611152
chr14_1802584	0.3939	0.2725	1.92402e-13	6.09196e-07
chr14_20246081	-0.2506	-0.2724	0.000459764	0.000434448
chr14_2528874	0.3479	0.2042	3.42563e-11	0.000773737
chr14_32749845	-0.1449	-0.1687	0.0417195	0.0288461
chr14_32852981	0.4093	0.3902	3.05817e-10	3.51682e-08
chr14_3579429	-0.1834	-0.2228	0.000409733	0.00051313
chr14_5330632	0.2496	0.2023	0.00222349	0.0291821
chr14_56361511	0.1541	0.3298	0.017754	3.58502e-06
chr14_65282211	0.421	0.5799	0.000580231	6.72058e-06
chr14_66109489	-0.2373	-0.488	0.0231819	1.64149e-05
chr14_75932562	-0.2858	-0.3628	3.71444e-05	2.23179e-06
chr14_8337815	-0.6077	-0.3848	5.89305e-08	2.50835e-05
chr14_8337907	-0.3218	-0.3791	0.000105316	0.000145388
chr15_1037847	0.2573	0.298	0.00138197	0.000892446
chr15_106181280	0.3387	0.2727	3.38143e-08	1.69915e-05
chr15_106181285	0.2926	0.3013	0.000144107	9.36486e-05
chr15_1233894	-0.2514	-0.2353	2.49256e-08	1.706e-05
chr15_15359077	0.4075	0.2902	1.33397e-10	4.32039e-05
chr15_2021245	0.188	0.1963	0.00419763	0.00454825
chr15_20559498	-0.344	-0.4394	3.64017e-06	1.06373e-07
chr15_2102833	0.04375	0.1534	0.385605	0.0171774
chr15_21668524	0.1152	0.09615	0.0038672	0.0139051
chr15_21668585	0.1115	0.1159	0.0154013	0.00822627
chr15_21668649	0.1207	0.09257	0.000483885	0.0105443
chr15_2252460	-0.3504	-0.2652	2.10179e-11	3.59585e-06
chr15_27088225	-0.211	-0.2139	0.000201696	0.000379808
chr15_36936369	0.3186	0.28	1.23546e-12	2.43187e-08
chr15_3858915	-0.001076	0.3319	0.99051	0.00533686
chr15_39273332	-0.1781	-0.2844	0.000640339	1.40805e-06
chr15_39273343	-0.2104	-0.3211	6.72254e-05	3.13073e-06
chr15_41657300	0.1464	0.1349	0.00115055	0.007281
chr15_5135509	-0.1961	-0.3696	0.00513608	9.16218e-06
chr15_68416463	0.1922	0.2211	0.00484205	0.00589028
chr15_68481010	0.02173	0.1938	0.682399	0.000666121
chr15_729548	0.08911	0.09058	0.0644036	0.106215
chr15_8284254	0.1897	0.4174	0.0748327	0.00366729
chr15_8452757	0.01976	0.1026	0.69533	0.0586833
chr15_92569	0.1465	0.2138	0.00991239	0.00339163
chr15_96600234	0.1216	0.133	0.0436684	0.0202053
chr15_96603583	0.3734	0.3099	9.54034e-08	0.000429257
chr15_9668271	0.1606	0.2165	0.0152576	0.00252265
chr15_97487668	0.2825	0.2963	2.63584e-06	3.61893e-05
chr16_11260166	0.1411	0.2349	0.00498243	2.71662e-05
chr16_11260168	0.2488	0.2844	1.45758e-06	4.54227e-06
chr16_175734	0.08943	0.2758	0.253918	0.00126035
chr16_18939687	-0.1662	-0.3334	0.00666212	5.6028e-07
chr16_18939692	-0.1892	-0.4335	0.00793576	1.45162e-07
chr16_20328162	0.08559	0.1032	0.010717	0.00465397
chr16_20363487	0.04302	0.111	0.173311	0.000703961
chr16_20364577	0.1114	0.07577	0.00161921	0.0463439
chr16_23013769	0.1519	0.2321	0.00406885	4.84604e-05
chr16_27661735	-0.2466	-0.1675	3.27069e-09	0.00024194
chr16_30055359	-0.3335	-0.2659	7.70689e-08	4.74876e-05
chr16_39420590	0.3554	0.1281	8.72646e-07	0.0978551
chr16_40764293	-0.5983	-0.2532	0	8.67609e-06
chr16_43348730	0.2032	0.2605	8.50694e-06	1.3242e-07
chr16_45833652	-0.352	-0.2926	2.5636e-11	6.31134e-07
chr16_4591850	0.1124	0.373	0.224059	0.000500679
chr16_46387972	0.1415	0.1159	0.00188574	0.0237371
chr16_52318973	-0.2955	-0.2758	7.53398e-08	8.73838e-06
chr16_55377951	0.3515	0.3352	8.50946e-08	9.51604e-07
chr16_59797487	-0.2384	-0.482	0.000906991	9.24919e-08
chr16_61073746	-0.0286	0.07733	0.434247	0.0607438
chr16_65669377	-0.0478	0.02902	0.0431183	0.293567
chr16_65723974	0.05247	0.1187	0.0676895	0.000122027
chr16_66423396	-0.3804	-0.3952	1.70862e-06	7.86555e-05
chr16_6650858	0.3262	0.3121	5.57672e-07	1.32369e-06
chr16_70081846	0.1078	0.2244	0.183454	0.0157058
chr16_70243033	-0.1259	-0.2028	0.0185063	0.000207526
chr16_7121542	0.3475	0.3382	5.70686e-06	3.11261e-05
chr16_72364543	0.3009	0.367	0.0045647	0.00347336
chr16_72801719	-0.3008	-0.3842	0.000177347	1.82849e-05
chr16_849057	-0.2813	-0.3046	9.083e-05	0.000339469
chr17_30938207	0.3716	0.2912	2.57074e-07	5.39835e-05
chr17_30938869	0.3906	0.277	7.77156e-16	5.15426e-08
chr17_30939641	0.2236	0.234	1.27952e-06	1.68387e-06
chr17_30939650	0.3026	0.2895	8.21102e-08	3.30796e-06
chr17_30940665	0.2101	0.2307	2.15743e-05	3.1515e-06
chr17_4948054	0.3624	0.281	5.93146e-06	0.00050274
chr17_7059913	0.1579	0.2483	0.000307989	4.14752e-08
chr17_77323943	0.2778	0.2511	8.09585e-08	0.000172512
chr17_77329928	0.1743	0.1746	0.000355795	0.0022283
chr17_88190351	-0.272	-0.3047	1.03087e-08	2.06204e-09
chr17_88916933	0.4104	0.329	3.63376e-11	1.00332e-06
chr17_88916945	0.4029	0.2864	2.34523e-10	6.9444e-06
chr17_88916955	0.3971	0.3103	5.34115e-10	4.40502e-06
chr17_89384329	-0.3044	-0.2225	9.07116e-10	0.000294539
chr18_1103356	-0.1605	-0.2764	0.00586317	0.000575256
chr18_49571688	0.443	0.3584	2.30313e-09	7.7824e-06
chr18_49571693	0.3707	0.3683	3.00585e-07	1.38233e-05
chr18_49571712	0.399	0.3543	7.47985e-08	4.60818e-06
chr18_56937338	0.1308	0.1353	0.0389556	0.0280672
chr18_644151	0.233	0.1705	0.00135415	0.0177428
chr18_71605364	0.1074	0.2865	0.148173	0.000909934
chr18_71768386	0.4602	0.3792	2.64995e-05	0.00438097
chr19_11841095	-0.094	-0.3893	0.150004	1.21704e-07
chr19_12756636	0.3862	0.2534	1.05337e-08	0.00140535
chr19_12756639	0.3454	0.3667	2.81319e-07	1.04103e-06
chr19_12756672	0.3412	0.4265	1.34006e-07	2.5768e-07
chr19_1384610	0.1969	0.2201	0.0233479	0.0139518
chr19_14725775	0.1674	0.3221	0.0265935	1.39023e-05
chr19_1612796	0.367	0.3206	0.0028572	0.00721616
chr19_17726818	0.02664	0.3044	0.7371	0.000966749
chr19_18135423	-0.2767	-0.4697	0.00897558	0.000437248
chr19_23382861	0.3791	0.348	1.0274e-06	2.15244e-06
chr19_24899616	-0.4458	-0.3432	6.78094e-10	1.30974e-05
chr19_2535961	0.3267	0.3083	4.2602e-07	3.85957e-05
chr19_2840528	0.1044	0.1722	0.0181945	0.000259825
chr19_2904906	0.005591	0.2117	0.915504	0.000730984
chr19_29205290	0.01649	0.243	0.828687	0.00847103
chr19_30756047	0.2087	0.2539	0.00182224	0.000585587
chr19_31129752	0.4018	0.3565	1.03483e-09	8.97292e-08
chr19_33498960	-0.2877	-0.2922	5.20143e-07	1.68979e-06
chr19_34982021	0.2261	0.192	0.000106096	0.00253739
chr19_3870333	-0.3527	-0.3374	4.33025e-07	1.85568e-05
chr19_38839808	0.1789	0.2319	0.00180036	0.00041331
chr19_38839873	0.2811	0.2381	1.50597e-05	0.000752881
chr19_38839888	0.2476	0.3503	0.000736656	7.67651e-05
chr19_38841454	0.3012	0.2449	1.56178e-07	5.74855e-05
chr19_38948971	0.323	0.2974	1.54839e-08	2.26379e-07
chr19_39783580	0.2402	0.1904	1.8287e-07	6.95387e-05
chr19_39949183	0.1184	0.2929	0.00569187	4.38858e-08
chr19_39949196	0.2141	0.2158	0.000125726	0.000632947
chr19_40762172	0.3048	0.1837	1.75703e-10	0.000366014
chr19_41989999	0.1805	0.1903	7.55407e-05	0.000306335
chr19_42064496	0.009045	0.1214	0.887399	0.127441
chr19_43677287	0.1456	0.472	0.0664086	1.19594e-06
chr19_47045700	-0.3096	-0.3297	7.82482e-07	1.84477e-06
chr19_4743541	0.3732	0.4523	0.000552813	0.000531223
chr19_48009972	0.212	0.2083	1.28921e-05	0.000222521
chr19_48360598	0.3736	0.4007	0.00037878	0.000709927
chr19_4892245	0.2652	0.3122	0.00046357	0.000108891
chr19_4892272	0.1933	0.1372	0.00106982	0.0252431
chr19_4892331	0.1272	0.2732	0.0609537	0.000214712
chr19_4895283	0.3023	0.272	3.48514e-05	0.00430735
chr19_49137444	0.102	0.3113	0.269175	0.00121196
chr19_49442528	0.3856	0.3331	1.04783e-09	2.66492e-07
chr19_49610382	0.07717	0.2098	0.203072	0.00120999
chr19_49881157	0.3661	0.2881	3.73815e-10	2.2811e-07
chr19_49881165	0.287	0.1951	2.41711e-08	0.000179513
chr19_50393416	0.3321	0.2736	1.1742e-09	1.29787e-05
chr19_50915110	0.3567	0.183	5.66611e-06	0.0216109
chr19_51026455	0.2536	0.2235	2.61921e-05	0.000462576
chr19_51183100	0.141	0.1767	0.00411344	0.00116861
chr19_51224004	-0.07278	-0.2827	0.222676	0.000471433
chr19_5647175	-0.2551	-0.3451	0.000141313	7.01228e-05
chr19_571206	-0.2582	-0.219	9.18274e-05	0.00331186
chr19_6425666	-0.479	-0.5131	5.73285e-06	1.2925e-06
chr19_6934831	-0.2577	-0.2184	2.22819e-10	6.3297e-07
chr19_7670627	0.3507	0.3232	0.00427628	0.0074115
chr2_115934844	0.26	0.3335	0.000585656	0.000347254
chr2_156787622	0.1876	0.3314	0.0101162	0.000255253
chr2_184656497	0.1955	0.2226	0.000108783	2.20122e-05
chr2_184672067	-0.4897	-0.4155	4.36646e-08	1.40659e-05
chr2_185641929	0.314	0.4436	4.78431e-05	1.0236e-06
chr2_185773515	0.1727	0.154	0.00260781	0.0166128
chr2_186521223	-0.2305	-0.2475	3.74716e-05	0.000979985
chr2_43042384	0.2474	0.1417	7.38191e-10	0.000964446
chr2_43042391	0.2845	0.2162	6.21976e-09	8.91382e-05
chr2_61361745	-0.3514	-0.2968	3.76002e-10	1.04456e-05
chr2_69964254	0.1426	0.177	0.0135603	0.00428111
chr2_72412634	0.3751	0.3097	3.6235e-09	1.05675e-07
chr2_76702984	0.3302	0.3679	3.3769e-05	7.41459e-05
chr2_79726416	0.1367	0.07162	0.000197461	0.121254
chr2_82124000	-0.1546	-0.2848	0.00318403	1.18631e-05
chr2_82124025	-0.3079	-0.2768	5.12998e-08	1.35635e-05
chr2_92774604	-0.1642	-0.2554	0.0146307	0.000294625
chr20_12926283	-0.08879	0.14	0.202377	0.182462
chr20_2096444	0.1955	0.2405	0.00660831	0.00351779
chr20_27573782	-0.1663	-0.2469	0.000234982	5.4673e-07
chr20_31737684	0.3514	0.2218	1.26565e-14	6.15687e-06
chr20_31737697	0.3643	0.2642	1.15103e-11	3.53571e-06
chr20_32759824	0.3159	0.3542	3.60642e-05	0.000157795
chr20_32759839	0.2409	0.127	2.70193e-05	0.0398493
chr20_37425936	0.3247	0.3167	1.7136e-09	2.42428e-06
chr20_38403425	-0.2145	-0.3371	0.00139176	2.47766e-05
chr20_423734	0.2069	0.3185	0.0155655	0.00205526
chr20_50482526	0.4112	0.2113	6.06049e-07	0.0233199
chr20_50482573	0.2533	0.2204	0.00171309	0.0128788
chr20_5883969	0.3279	0.3514	9.03272e-07	2.10349e-06
chr20_602080	0.2197	0.1134	0.000253043	0.0864959
chr20_60308585	0.3609	0.2634	4.33848e-07	0.000409892
chr20_67109379	-0.2359	-0.2433	4.3157e-06	9.13161e-06
chr20_70494595	0.2319	0.1726	5.35134e-05	0.00717503
chr20_70613965	0.1783	0.3167	0.00558905	1.20435e-05
chr20_70894727	-0.3002	-0.1749	1.85157e-09	0.00246271
chr20_958985	-0.01516	0.2066	0.80204	0.00555235
chr3_102668064	0.2812	0.2216	1.72245e-08	1.0705e-05
chr3_1104611	-0.03393	-0.001818	0.0793067	0.923234
chr3_110708613	0.2555	0.1846	9.05743e-06	0.00145656
chr3_110708668	0.1716	0.2049	0.000220477	0.00011046
chr3_110708682	0.2414	0.1451	1.7392e-06	0.00581214
chr3_110708688	0.2849	0.2126	7.22323e-07	0.000646005
chr3_152525153	0.2118	0.1815	4.12052e-05	0.000412912
chr3_152525322	0.2182	0.2929	1.20145e-05	1.28564e-07
chr3_152710599	-0.3193	-0.2627	3.54161e-14	5.97552e-08
chr3_170949460	0.1475	0.4667	0.174581	3.28023e-05
chr3_170949484	0.2108	0.4344	0.0217966	0.00015088
chr3_171600582	0.1708	0.4305	0.0929515	0.000539515
chr3_175125090	0.5244	0.4829	5.77746e-07	6.31001e-05
chr3_175125092	0.4613	0.4805	1.11831e-05	3.82362e-05
chr3_175299514	0.3899	0.3967	1.92346e-05	4.08209e-05
chr3_2493529	0.3181	0.1238	4.98943e-09	0.029113
chr3_34598170	0.2334	0.3052	0.00369504	8.34385e-05
chr3_35661259	0.3377	0.252	2.4245e-05	0.00660815
chr3_42022142	0.3305	0.2418	5.23158e-08	0.000172596
chr3_42651143	-0.354	-0.3912	8.10308e-07	2.31886e-07
chr3_46295538	-0.1598	-0.39	0.0261284	1.06377e-07
chr3_49952374	0.3387	0.2968	1.15109e-10	3.14919e-08
chr3_49953026	0.4669	0.3115	3.5121e-11	3.61871e-05
chr3_52731493	0.1797	0.2805	0.00197523	4.51886e-06
chr3_54787453	0.06953	0.1487	0.223071	0.0264334
chr3_56747346	0.364	0.3657	4.39005e-06	3.56138e-06
chr3_65454052	0.5519	0.3371	0	1.38405e-07
chr3_75386442	-0.3489	-0.2926	1.41514e-09	1.32689e-06
chr3_75386456	-0.3898	-0.3698	7.49262e-09	2.24164e-07
chr3_86121190	0.1935	0.1986	0.00448609	0.0011322
chr3_90116928	0.4884	0.3971	2.75112e-08	2.58407e-05
chr3_9852361	0.3214	0.2307	6.09494e-10	1.7149e-05
chr4_100371431	0.3405	0.41	0.000196033	0.000174452
chr4_100371605	0.3666	0.2111	1.5099e-14	2.19353e-05
chr4_10803177	0.2252	0.2406	9.08783e-07	5.38577e-07
chr4_10803247	0.32	0.3348	7.67927e-06	8.26178e-06
chr4_108285390	0.3042	0.339	2.22842e-05	5.13086e-06
chr4_112542804	0.3983	0.3199	6.25893e-11	1.32957e-07
chr4_112542999	0.2859	0.2981	3.97342e-06	3.97217e-06
chr4_112543017	0.2987	0.3315	3.92823e-07	9.74672e-08
chr4_112543042	0.3867	0.2887	3.21669e-11	4.5212e-06
chr4_112543080	0.289	0.2688	1.71862e-07	7.40921e-07
chr4_112543179	0.2865	0.1577	2.94997e-12	0.000300785
chr4_112543197	0.3514	0.1963	1.3145e-13	2.93367e-05
chr4_112664138	0.2939	0.2237	1.90099e-11	3.03103e-06
chr4_112664372	0.377	0.4501	5.87833e-07	7.89261e-10
chr4_112664678	0.2939	0.2165	3.36972e-09	9.46309e-06
chr4_112664700	0.3989	0.2793	6.66134e-16	1.70992e-06
chr4_152287496	0.2693	0.1773	2.33713e-12	3.17025e-05
chr4_152287531	0.1266	0.18	0.00131613	6.54091e-06
chr4_152942384	-0.2466	-0.3916	0.00823413	0.000891944
chr4_164925734	0.2696	0.2679	8.45324e-12	1.07872e-09
chr4_31274248	-0.3766	-0.3597	6.27651e-06	0.000264678
chr4_31440571	0.3268	0.2153	4.65402e-06	0.00171601
chr4_31440577	0.2441	0.2463	0.000227812	0.000203399
chr4_40867046	0.1514	0.2321	0.0312092	0.00365792
chr4_43176668	-0.2585	-0.2317	9.37845e-08	3.28326e-05
chr4_66206731	0.02969	0.1371	0.725301	0.243949
chr4_6718462	-0.5464	-0.401	2.01505e-13	5.00002e-06
chr5_173522080	-0.289	-0.4124	0.00764706	0.000633612
chr5_1853017	0.175	0.1892	0.000310279	0.00418515
chr5_19553177	0.3119	0.2242	7.14375e-11	2.94986e-06
chr5_31169688	0.01618	0.02002	0.109844	0.0483294
chr5_4553434	0.2102	0.2126	9.99534e-06	1.32751e-05
chr5_55734	0.04344	0.1988	0.505638	0.0105432
chr5_852327	0.07794	0.07766	0.0196251	0.0443448
chr6_1183153	0.0898	0.1678	0.160891	0.0311747
chr6_126392270	0.1523	0.1814	0.00108733	0.000641741
chr6_127306714	-0.1801	-0.2621	7.92144e-05	5.9294e-09
chr6_129049363	-0.4501	-0.284	1.05002e-09	0.000696534
chr6_134371563	-0.003536	0.2373	0.948828	0.000103245
chr6_134371593	0.2036	0.2267	0.000140369	7.66543e-05
chr6_134386724	0.1675	0.181	0.000303549	0.000176119
chr6_134427947	0.3879	0.404	5.47789e-06	0.000117697
chr6_134628069	0.2366	0.08486	2.83662e-08	0.0561701
chr6_139469017	-0.5093	-0.5488	6.02941e-07	1.65362e-06
chr6_139469066	-0.3955	-0.5267	8.84685e-07	1.76024e-08
chr6_14506361	0.404	0.3309	1.92302e-09	4.53186e-07
chr6_145458316	0.2141	0.204	9.35866e-06	0.000132312
chr6_166047059	0.1587	0.3336	0.0180201	6.14157e-05
chr6_166060531	0.1964	0.2117	0.000938438	0.00255891
chr6_166060641	0.2849	0.1909	4.39552e-10	0.00017772
chr6_166060649	0.2291	0.1567	6.2322e-09	0.000394231
chr6_166060936	0.3976	0.4384	2.84531e-05	3.56559e-06
chr6_166060968	0.3192	0.3056	4.75201e-05	0.000456224
chr6_168991851	-0.4197	-0.2672	6.43929e-15	1.07178e-05
chr6_169142649	0.4035	0.2391	0	8.23892e-07
chr6_169142651	0.3546	0.1987	0	1.4926e-05
chr6_171620661	-0.3325	-0.2623	4.82403e-12	1.11147e-06
chr6_172402604	0.008223	0.09536	0.848448	0.0316805
chr6_2566135	0.5755	0.4722	1.50708e-08	1.38479e-05
chr6_28250914	0.07088	0.2731	0.41527	0.0214509
chr6_4457936	-0.3235	-0.4753	0.000101724	5.03851e-07
chr6_6443801	-0.2939	-0.3292	0.000403836	0.000224825
chr6_70366058	-0.2539	-0.2608	1.42918e-06	5.99143e-06
chr7_129318908	0.2193	0.2072	0.00208394	0.0259648
chr7_129318913	0.1921	0.4256	0.0042474	1.00868e-06
chr7_149048597	0.3824	0.281	1.38778e-14	1.96454e-07
chr7_149048623	0.4521	0.2881	2.15161e-13	2.26852e-06
chr7_155404570	0.1645	0.3121	0.0382295	0.00337919
chr7_157373184	-0.4395	-0.279	2.10942e-15	9.74737e-06
chr7_159097294	0.2085	0.2868	0.00233544	0.000121816
chr7_159296347	0.1444	0.1896	0.00141135	3.73283e-05
chr7_159330772	0.2473	0.2551	0.000146473	0.00060757
chr7_16062621	0.161	0.2246	0.00651421	0.000403084
chr7_25661678	0.02481	0.01851	0.128873	0.231442
chr7_25661725	-0.07419	-0.03388	4.99636e-10	0.00318963
chr7_39343100	0.1173	0.1485	0.00461088	0.00120666
chr7_41464089	-0.6374	-0.4165	0	1.14528e-07
chr7_41464159	-0.5605	-0.3345	0	2.75122e-07
chr7_41464208	-0.4735	-0.4437	3.91602e-10	2.43801e-07
chr7_41464216	-0.7079	-0.5342	1.78744e-11	6.82389e-07
chr7_44598173	-0.2427	-0.2016	6.05379e-07	6.51777e-05
chr7_44877586	0.1721	0.1592	0.00157356	0.00500275
chr7_44877611	0.2077	0.1992	0.00202632	0.00151807
chr7_48826204	-0.3279	-0.3561	6.11293e-05	6.12014e-05
chr7_51475914	-0.2852	-0.2	2.21983e-09	0.00014117
chr7_51565084	0.05625	0.2145	0.340366	0.0012241
chr7_6154590	0.1385	0.1185	0.00829714	0.0360589
chr7_6281067	0.3577	0.3809	2.28657e-05	7.01428e-06
chr7_6281084	0.397	0.2876	5.25276e-09	2.4901e-06
chr7_6281100	0.3614	0.4024	1.68979e-07	2.8113e-08
chr7_6281106	0.3556	0.3401	1.74867e-08	7.13003e-08
chr7_6281136	0.359	0.3732	2.40043e-06	2.90966e-06
chr7_6281284	0.3496	0.2794	7.05127e-08	0.000212278
chr7_6281673	0.3184	0.3676	2.43e-06	3.24512e-08
chr7_6281681	0.3648	0.4139	1.29676e-09	8.41027e-12
chr7_64739972	-0.04084	0.1093	0.238934	0.00251677
chr7_72323887	0.5172	0.4129	1.44446e-07	0.000912311
chr7_73301098	0.176	0.2243	0.000320237	0.000194619
chr7_79626197	0.2954	0.2665	8.68059e-10	5.53939e-06
chr7_85467976	0.4235	0.2703	1.14155e-09	0.0010234
chr7_85469300	0.3856	0.2937	1.35018e-07	1.24569e-05
chr7_85469856	0.2642	0.2122	2.0982e-08	4.62528e-05
chr7_93082283	0.328	0.2869	8.51543e-06	0.000134584
chr7_94037796	0.5429	0.439	7.63828e-11	2.52978e-05
chr7_9642323	-0.2157	-0.3127	0.00132972	3.15751e-05
chr8_138548582	-0.004816	0.2501	0.924888	4.43366e-06
chr8_139099585	0.2559	0.4028	0.00264339	1.4867e-05
chr8_139099600	0.3007	0.3397	0.000649681	6.01065e-05
chr8_139099690	0.2349	0.3531	0.00765123	8.2306e-05
chr8_139099697	0.2824	0.4037	0.000400746	2.63959e-07
chr8_1756963	-0.2456	-0.2799	0.000162303	0.000300243
chr8_20641278	0.279	0.3044	1.77519e-07	8.24668e-07
chr8_20641311	0.2953	0.2798	4.08075e-07	1.64397e-05
chr8_24464805	-0.1988	-0.4038	0.0173333	0.000417604
chr8_25402437	-0.3417	-0.3746	6.61989e-06	0.000139318
chr8_40151119	0.2873	0.2306	1.02932e-10	1.12503e-06
chr8_43154810	-0.2929	-0.3306	2.13853e-07	1.05053e-07
chr8_4661	-0.07694	-0.03837	3.48064e-05	0.0535496
chr8_4862326	-0.3353	-0.231	7.06217e-11	1.23563e-05
chr8_62124317	0.3068	0.107	5.15588e-12	0.0359139
chr8_6728369	-0.2384	0.07301	1.52062e-06	0.233446
chr8_6808106	0.02077	0.08819	0.46938	0.00588878
chr8_6808125	0.09387	0.09481	0.000427889	0.000639685
chr8_6808127	0.08871	0.113	0.000719913	2.18749e-05
chr8_6808201	0.08844	0.1052	0.0034986	0.00126079
chr8_6808403	0.07287	0.1065	0.0196492	0.00284264
chr8_6808410	0.1272	0.1246	1.31063e-07	6.52487e-05
chr8_6808456	0.08253	0.07624	0.0055937	0.0204178
chr8_798884	0.09053	0.1573	0.282734	0.115687
chr9_110967678	0.1947	0.2219	0.00249481	0.00133711
chr9_116139661	0.3984	0.3698	3.47264e-06	0.000566064
chr9_116143515	0.2094	0.1856	0.000126849	0.00187567
chr9_116143748	0.3107	0.1997	4.66639e-08	0.000667182
chr9_118828144	-0.2584	-0.2934	2.44176e-07	2.98017e-08
chr9_124611981	0.02929	0.2532	0.655571	0.00114291
chr9_124611985	0.05436	0.2044	0.444145	0.0118475
chr9_1763128	-0.01514	0.002437	0.425216	0.900066
chr9_1763214	-0.06592	-0.02086	7.73026e-12	0.0346062
chr9_1763270	0.06302	0.04691	0.0152439	0.0902364
chr9_3211827	0.1349	0.09807	8.02315e-10	1.57752e-05
chr9_452569	0.1325	0.366	0.126837	0.00139521
chr9_50869300	-0.2659	-0.2929	1.13549e-06	8.28834e-08
chr9_53555735	-0.2041	-0.2864	0.00113853	9.17623e-05
chr9_572605	0.02417	0.008212	0.101019	0.602045
chr9_572656	-0.01734	-0.003933	0.143697	0.750702
chr9_572671	0.09294	0.0351	2.86594e-08	0.0604724
chr9_572770	0.09825	0.04316	5.95982e-09	0.0112538
chr9_572818	0.05469	0.01672	5.08946e-05	0.219213
chr9_572860	0.09167	0.01852	2.39e-09	0.240482
chr9_572871	0.1095	0.03955	2.44149e-12	0.0163859
chr9_573230	0.1086	0.04518	8.03148e-11	0.00681469
chr9_93521748	-0.3014	-0.3381	2.8955e-08	1.73293e-08
chr9_93521865	-0.3971	-0.2497	0	2.55724e-07
chr9_96163854	0.1266	0.1633	0.0404461	0.0946866
