# Supplementary material for: High social status males experience accelerated epigenetic aging in wild baboons
Source: eLife journal article supplement (doi:10.7554/elife.66128), 2021-04-05
Supplement: supp [file elife-66128-supp-v1.zip › elife_poa_e66128_Supplementary_file_4.xlsx]

## Sheet: Supplementary Table 4
	Cumulative adversity	DSIF	Rank	Age-adjusted BMI	Age
Cumulative adversity	-	-0.222 (0.073)	0.310 (0.011)	0.098 (0.432)	-0.284 (0.021)
DSIF	NA	-	-0.266 (0.031)	-0.188 (0.131)	0.112 (0.372)
Rank	-0.058 (0.578)	NA	-	0.058 (0.646)	0.218 (0.078)
Age-adjusted BMI	-0.038 (0.719)	NA	-0.068 (0.516)	-	-0.098 (0.434)
Age	0.133 (0.202)	NA	-0.313 (0.002)	-0.075 (0.476)	-
