# Supplementary material for: High social status males experience accelerated epigenetic aging in wild baboons
Source: eLife journal article supplement (doi:10.7554/elife.66128), 2021-04-05
Supplement: supp [file elife-66128-supp-v1.zip › elife_poa_e66128_Supplementary_file_5.xlsx]

## Sheet: Supplementary Table 5
	β	P-value	β	P-value	β	P-value	β	P-value	β	P-value	β	P-value	β	P-value	β	P-value
Cumulative Early Adversity	-0.005	0.973	-0.004	0.98	-0.013	0.93	-0.013	0.93	-0.073	0.556	-0.003	0.984	-0.034	0.848	0.005	0.97
Age (years)	-0.277	8.36 x 10-8	-0.219	5.42 x 10-6	-0.337	9.01 x 10-8	-0.337	9.01 x 10-8	-0.248	4.8 x 10-6	-0.285	4.07 x 10-6	-0.257	5.13 x 10-4	-0.29	5.23 x 10-8
Ordinal rank	-0.078	7.39 x 10-4	—	—	-0.065	1.52 x 10-2	-0.092	1.88 x 10-4	—	—	-0.087	0.045	-0.083	7.14 x 10-3	-0.076	1.50 x 10-3
Age-adjusted BMI	0.111	6.33 x 10-3	0.154	2.57 x 10-4	—	—	—	—	—	—	0.111	6.45 x 10-3	—	—	0.104	1.09 x 10-2
Rank (residual for BMI)	—	—	-0.09	9.93 x 10-4	—	—	—	—	—	—	—	—	—	—	—	—
Raw BMI	—	—	—	—	0.045	0.139	—	—	0.038	0.112	—	—	—	—	—	—
BMI (residual for rank)	—	—	—	—	—	—	0.045	0.139	—	—	—	—	—	—	—	—
Rank-for-age	—	—	—	—	—	—	—	—	—	—	0.012	0.819	—	—	—	—
Age-adjusted BMI (BMI> 41 individuals)	—	—	—	—	—	—	—	—	—	—	—	—	0.167	2.47 x 10-3	—	—
Sequencing depth	—	—	—	—	—	—	—	—	—	—	—	—	—	—	-0.012	0.252
Bisulfite conversion rate	—	—	—	—	—	—	—	—	—	—	—	—	—	—	16.025	0.728
