# Supplementary figures and images for: High social status males experience accelerated epigenetic aging in wild baboons
Source: eLife journal article supplement (doi:10.7554/elife.66128), 2021-04-05

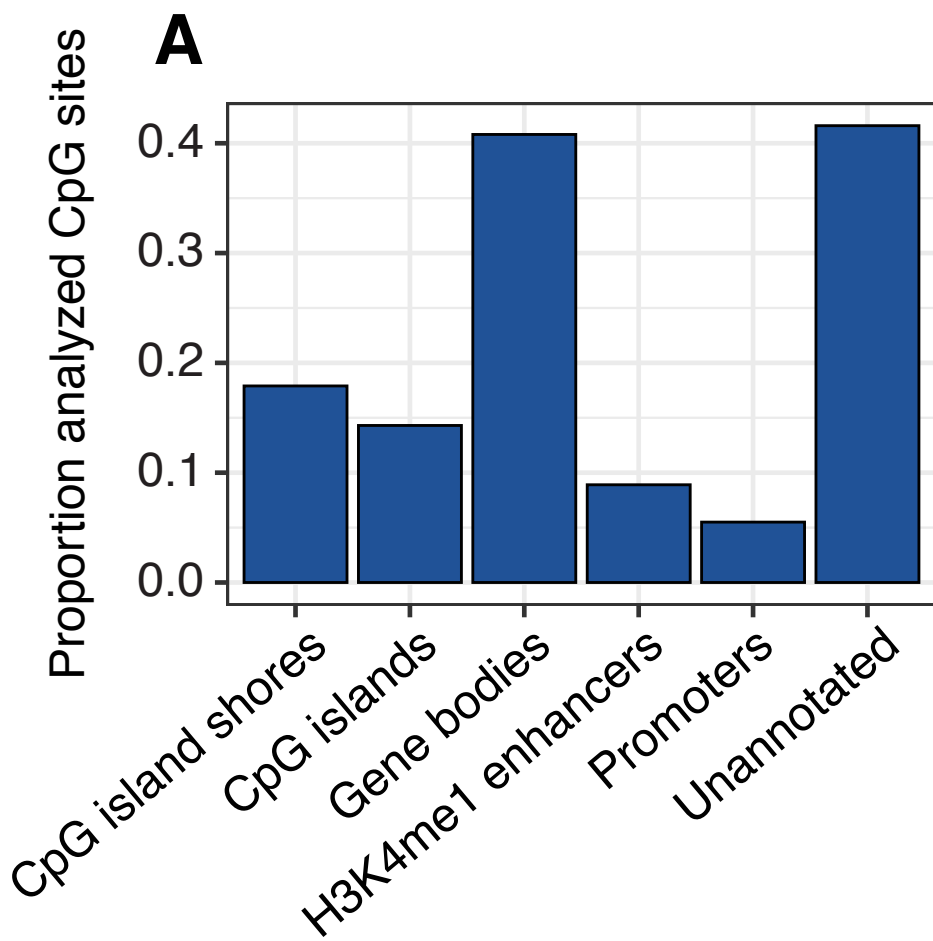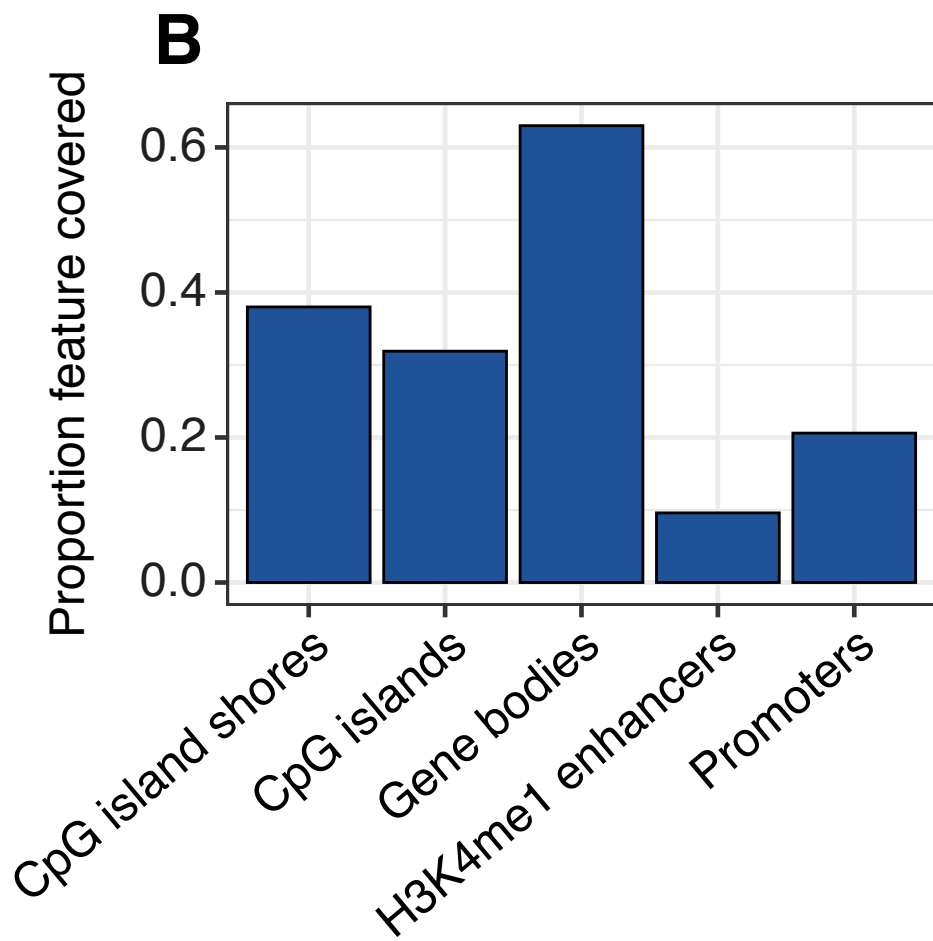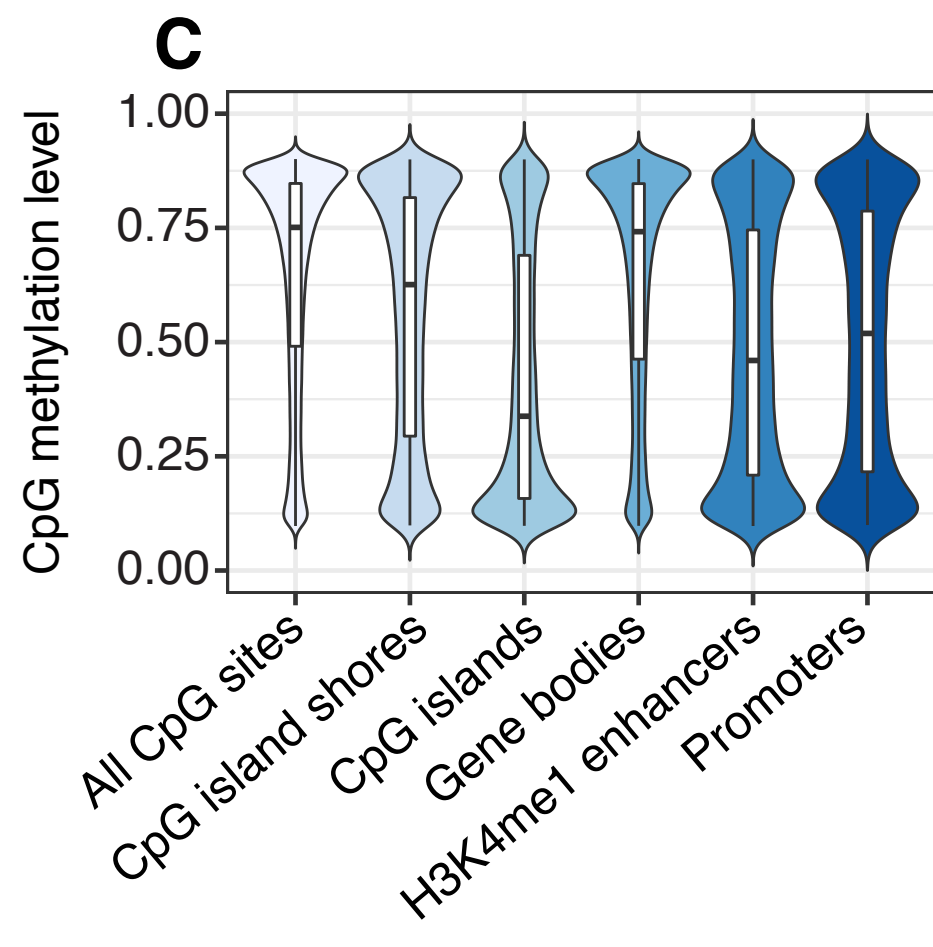

Supplement: supp [file elife-66128-supp-v1.zip › elife_poa_e66128_Figure_1_figure_supplement_1.pdf]

**A****All individuals N = 277**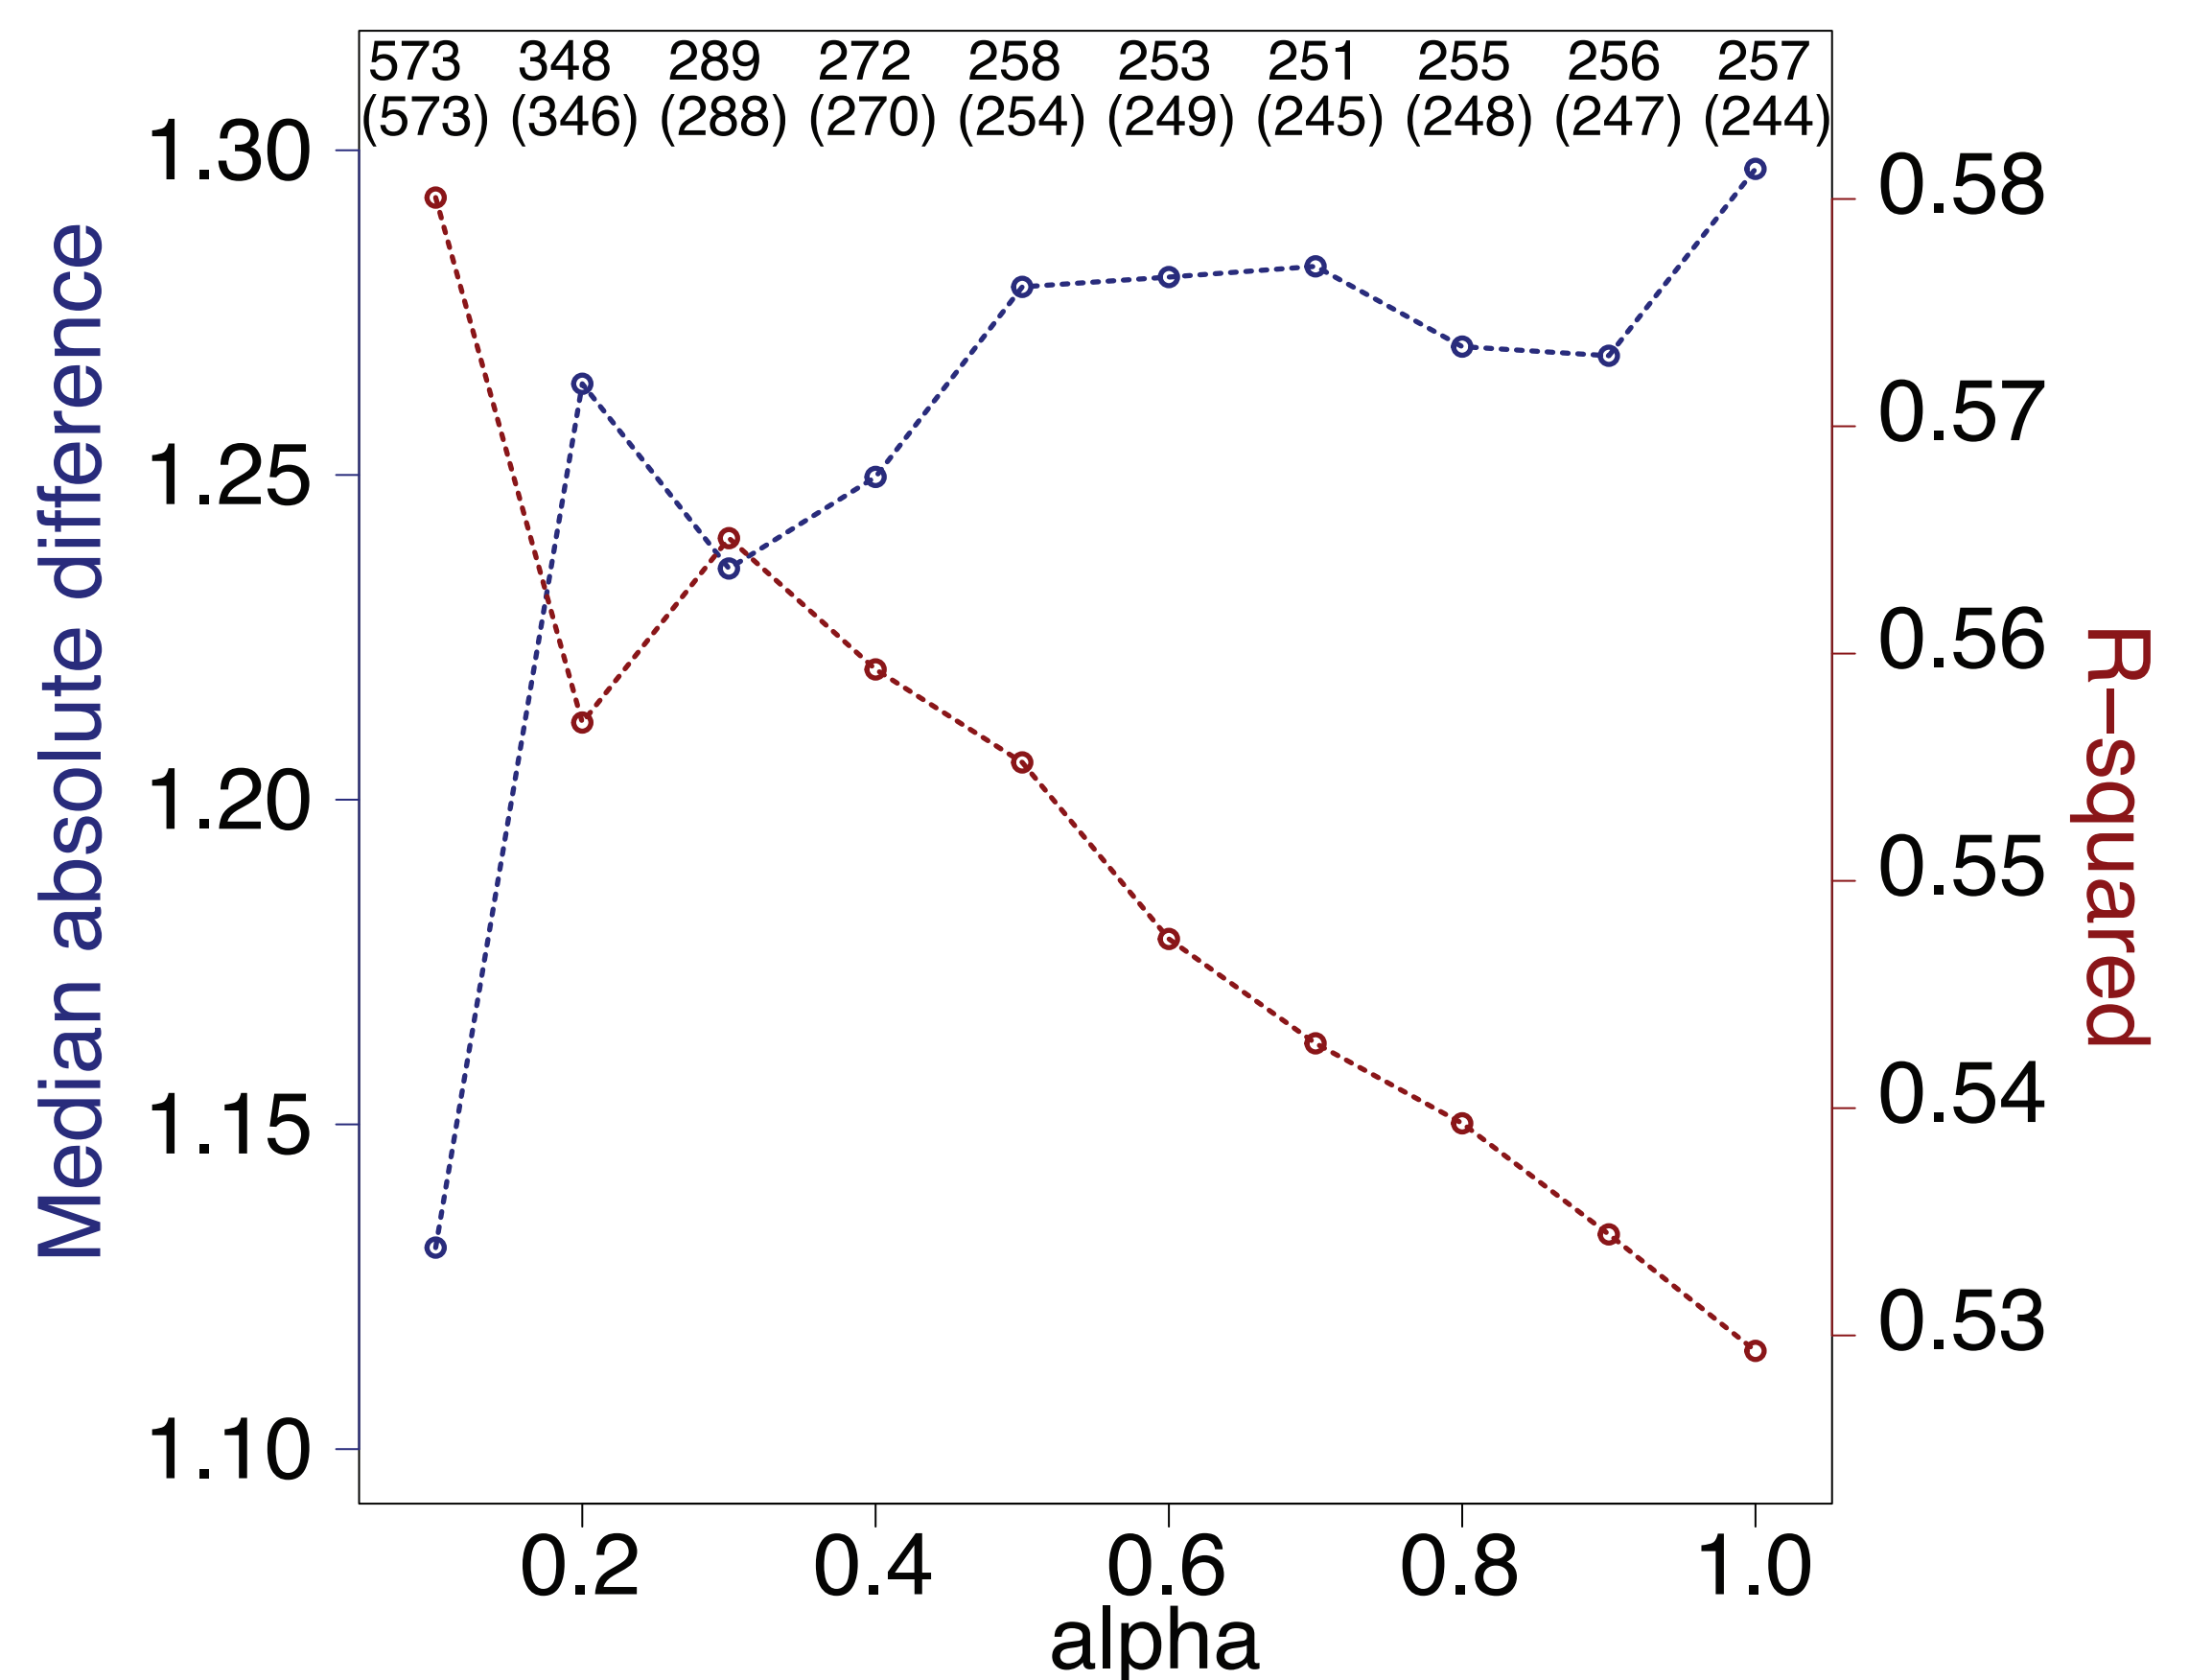**B****Males N = 135**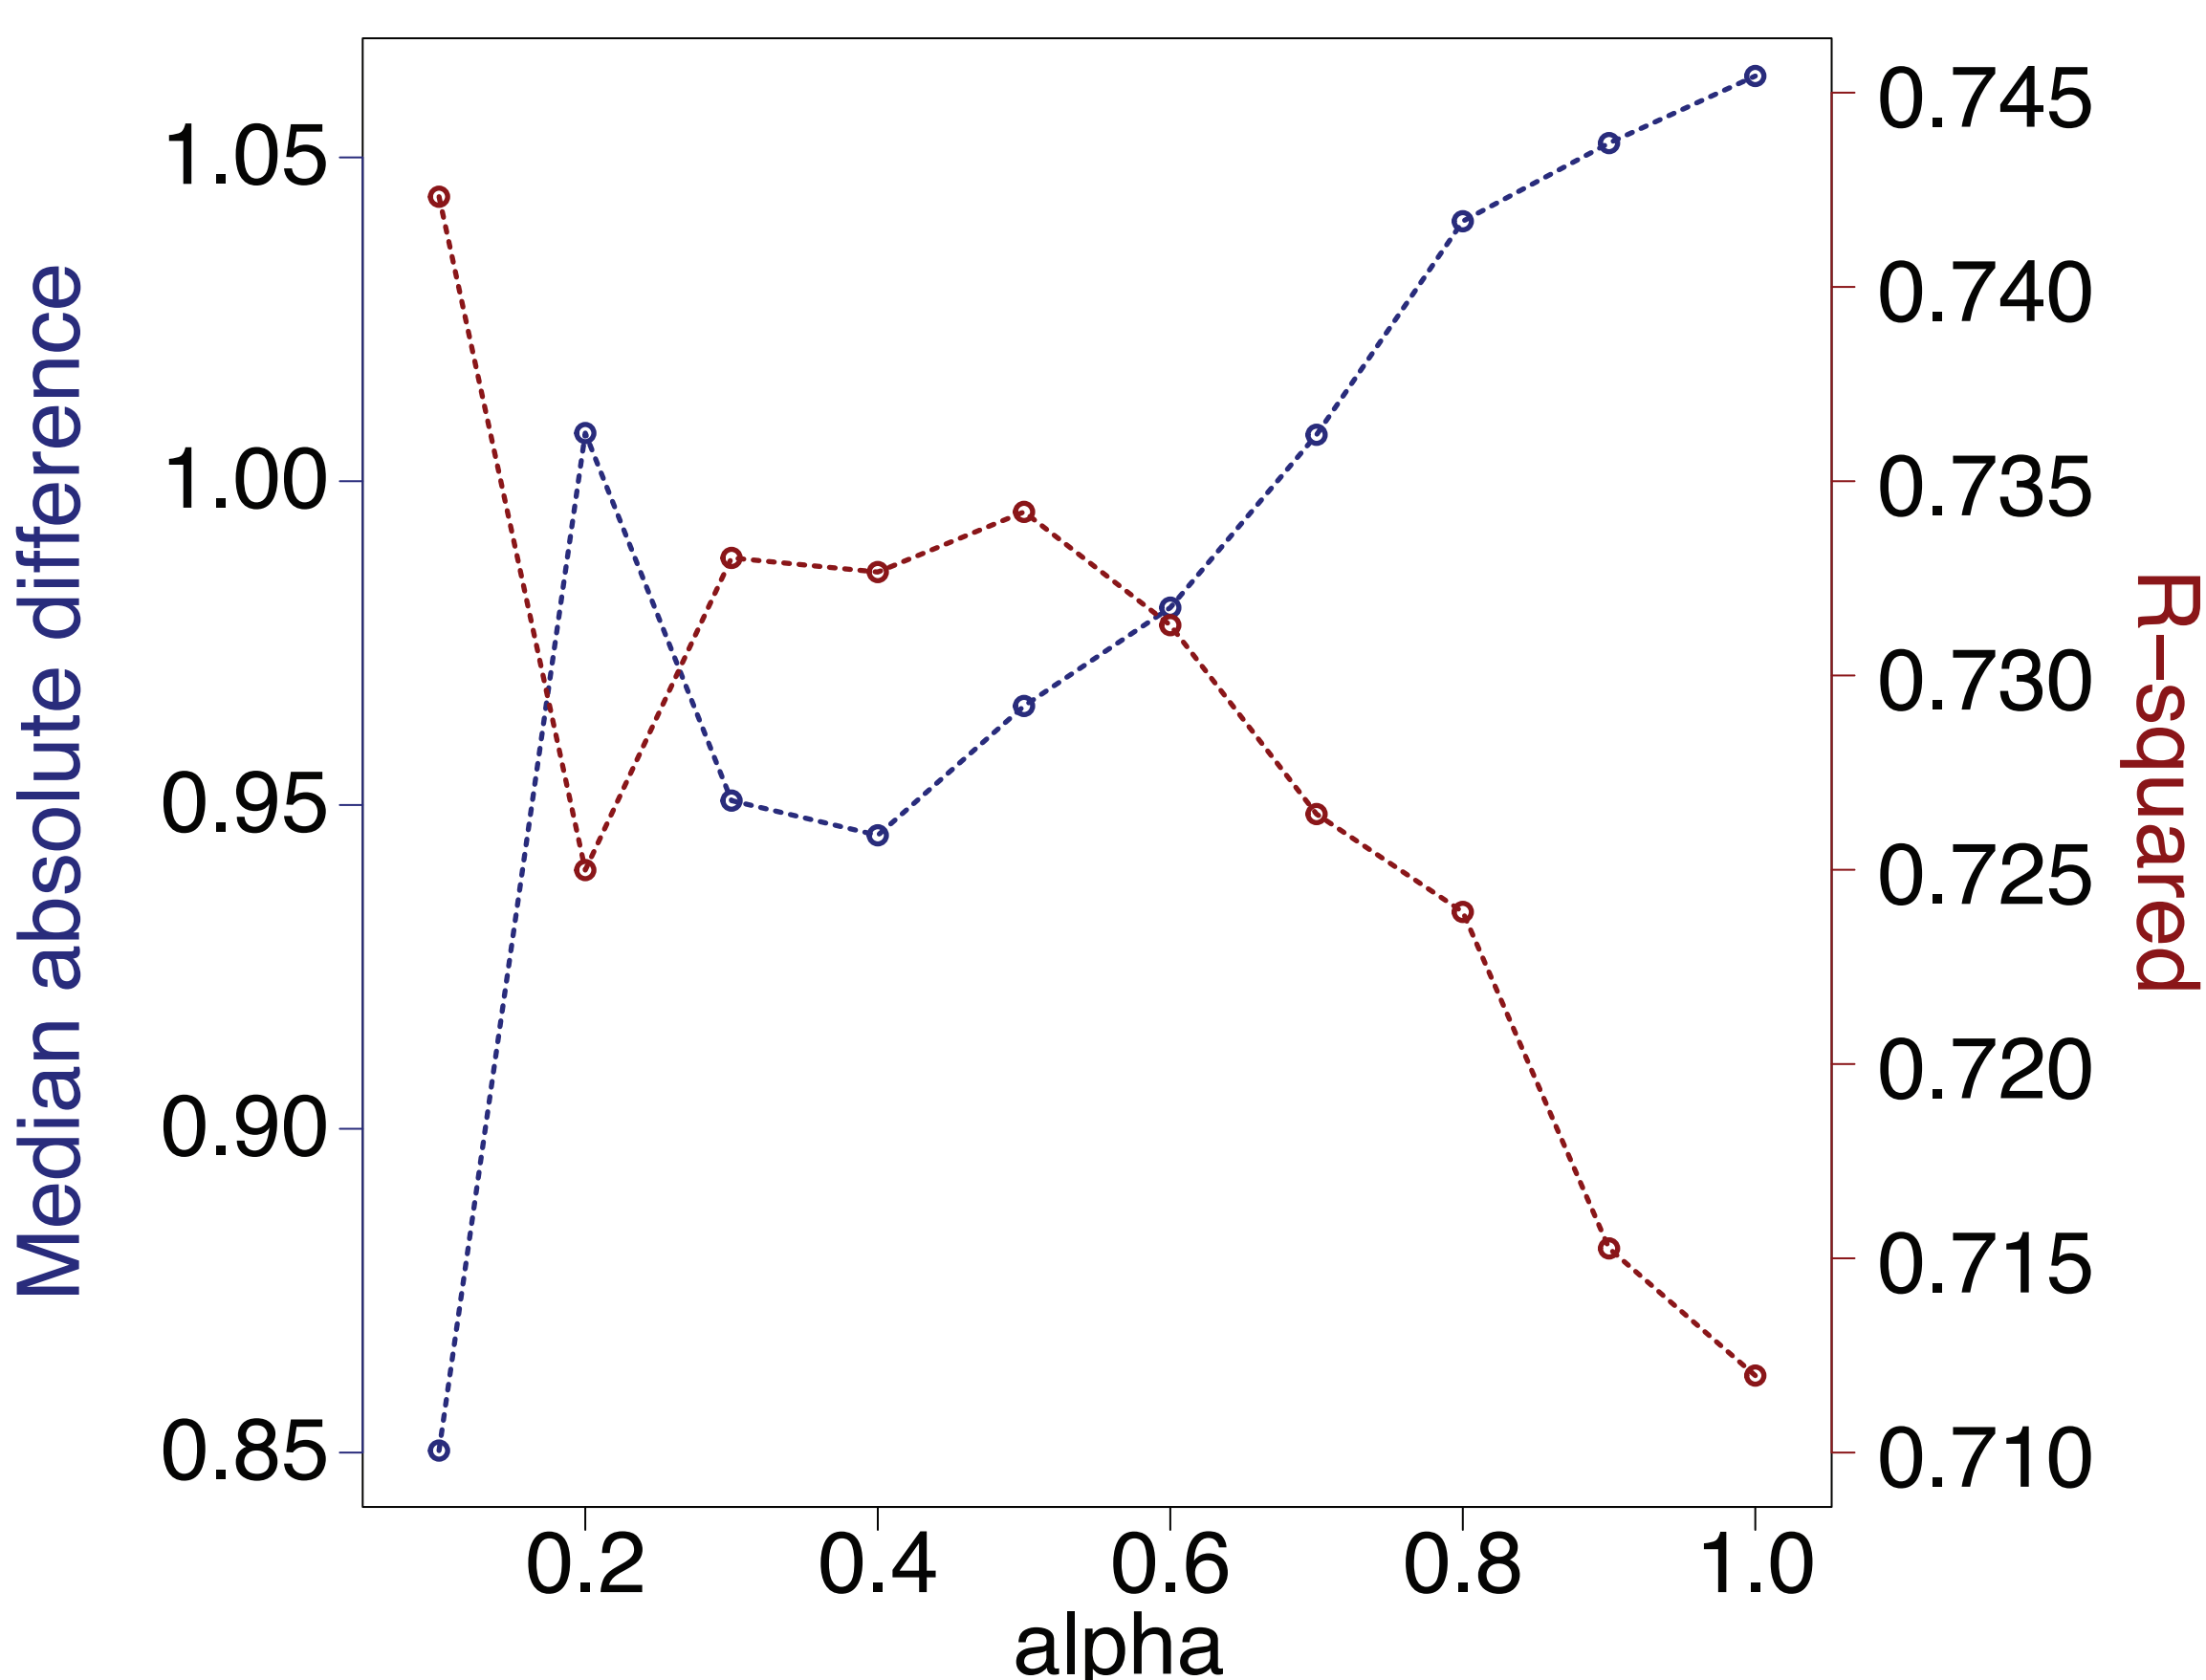**C****Females N=142**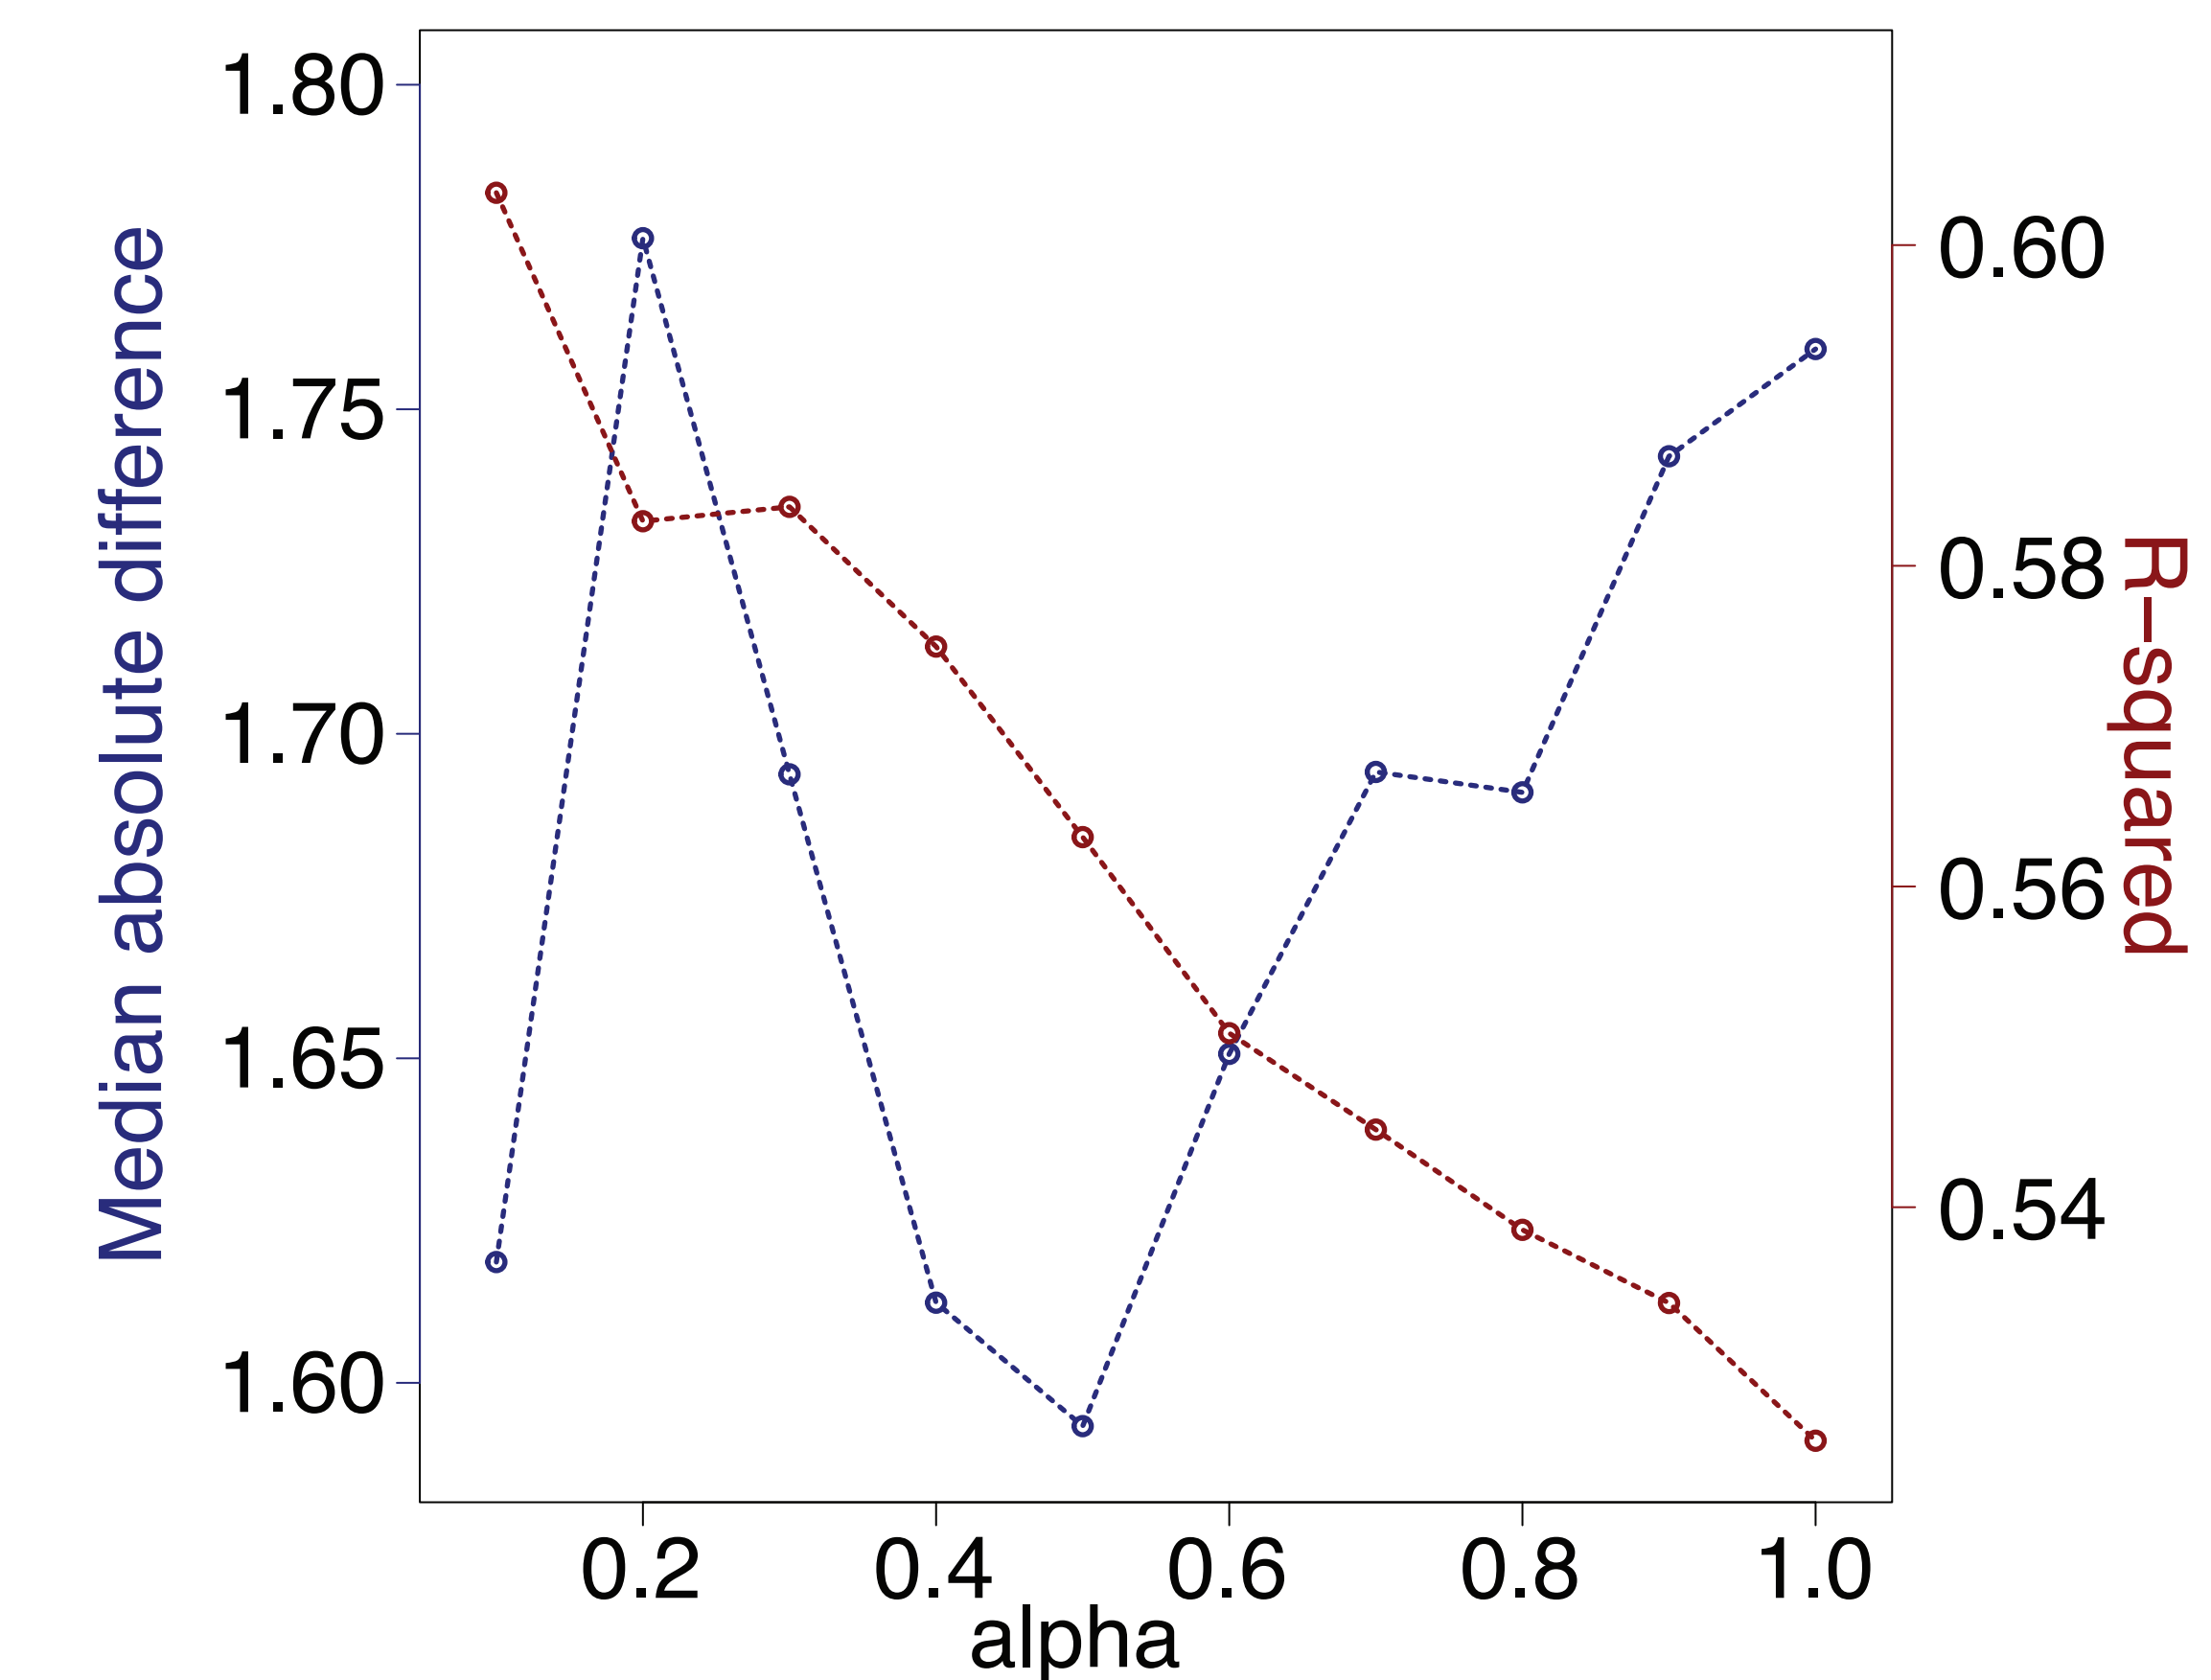

Supplement: supp [file elife-66128-supp-v1.zip › elife_poa_e66128_Figure_1_figure_supplement_2.pdf]

**A**

## Genomic annotations

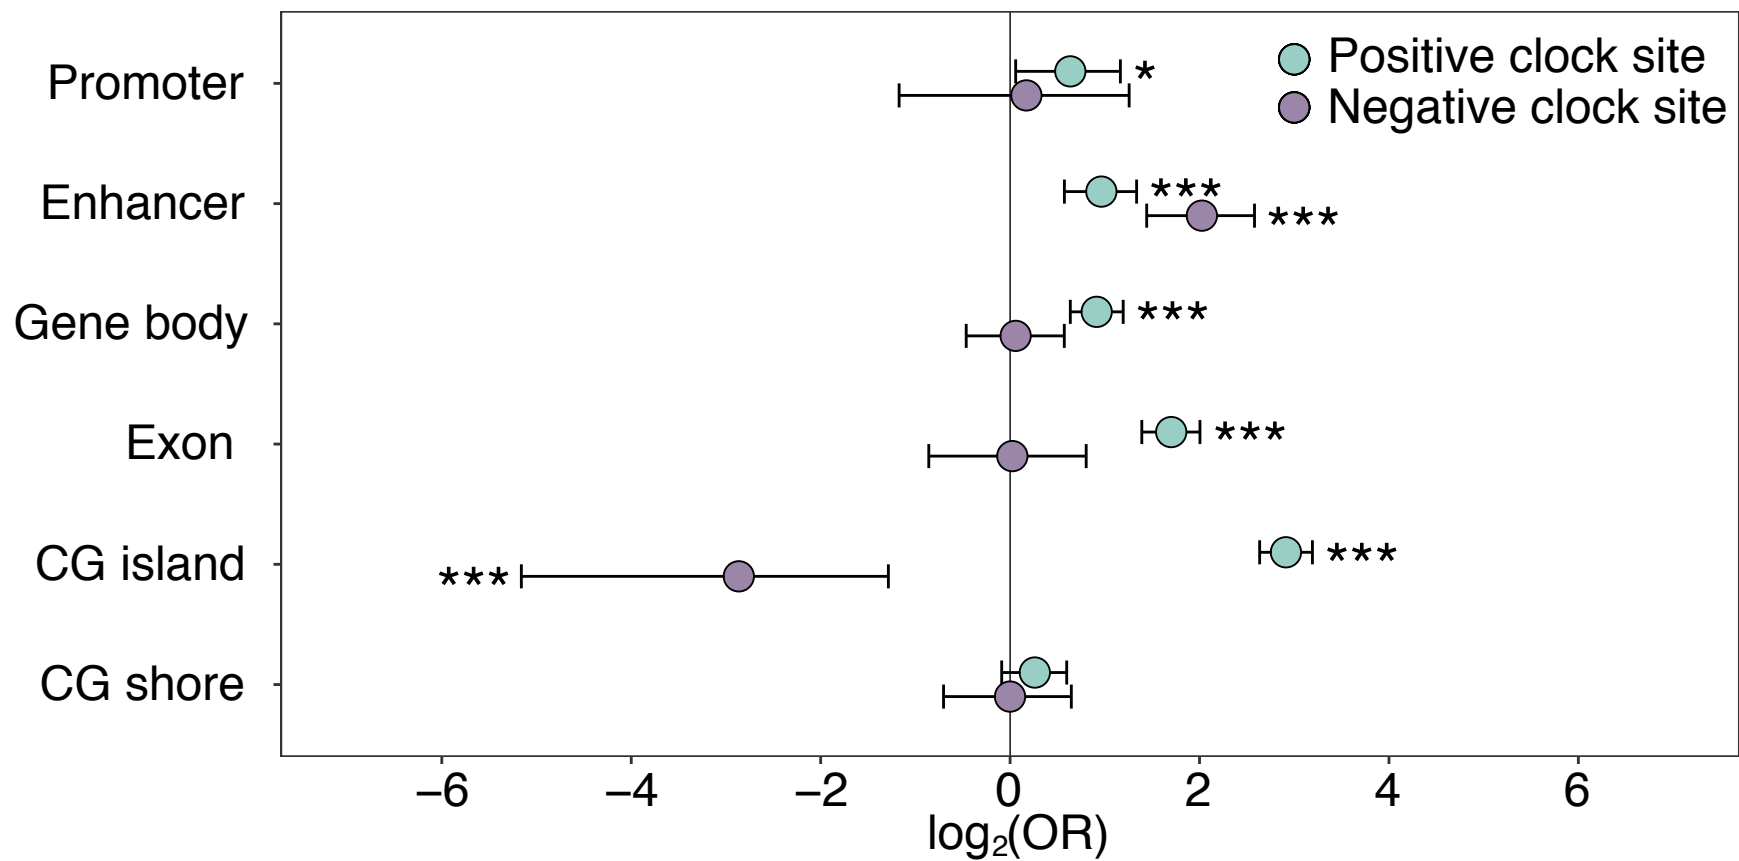**B**

## Previously published genomic regions of interest

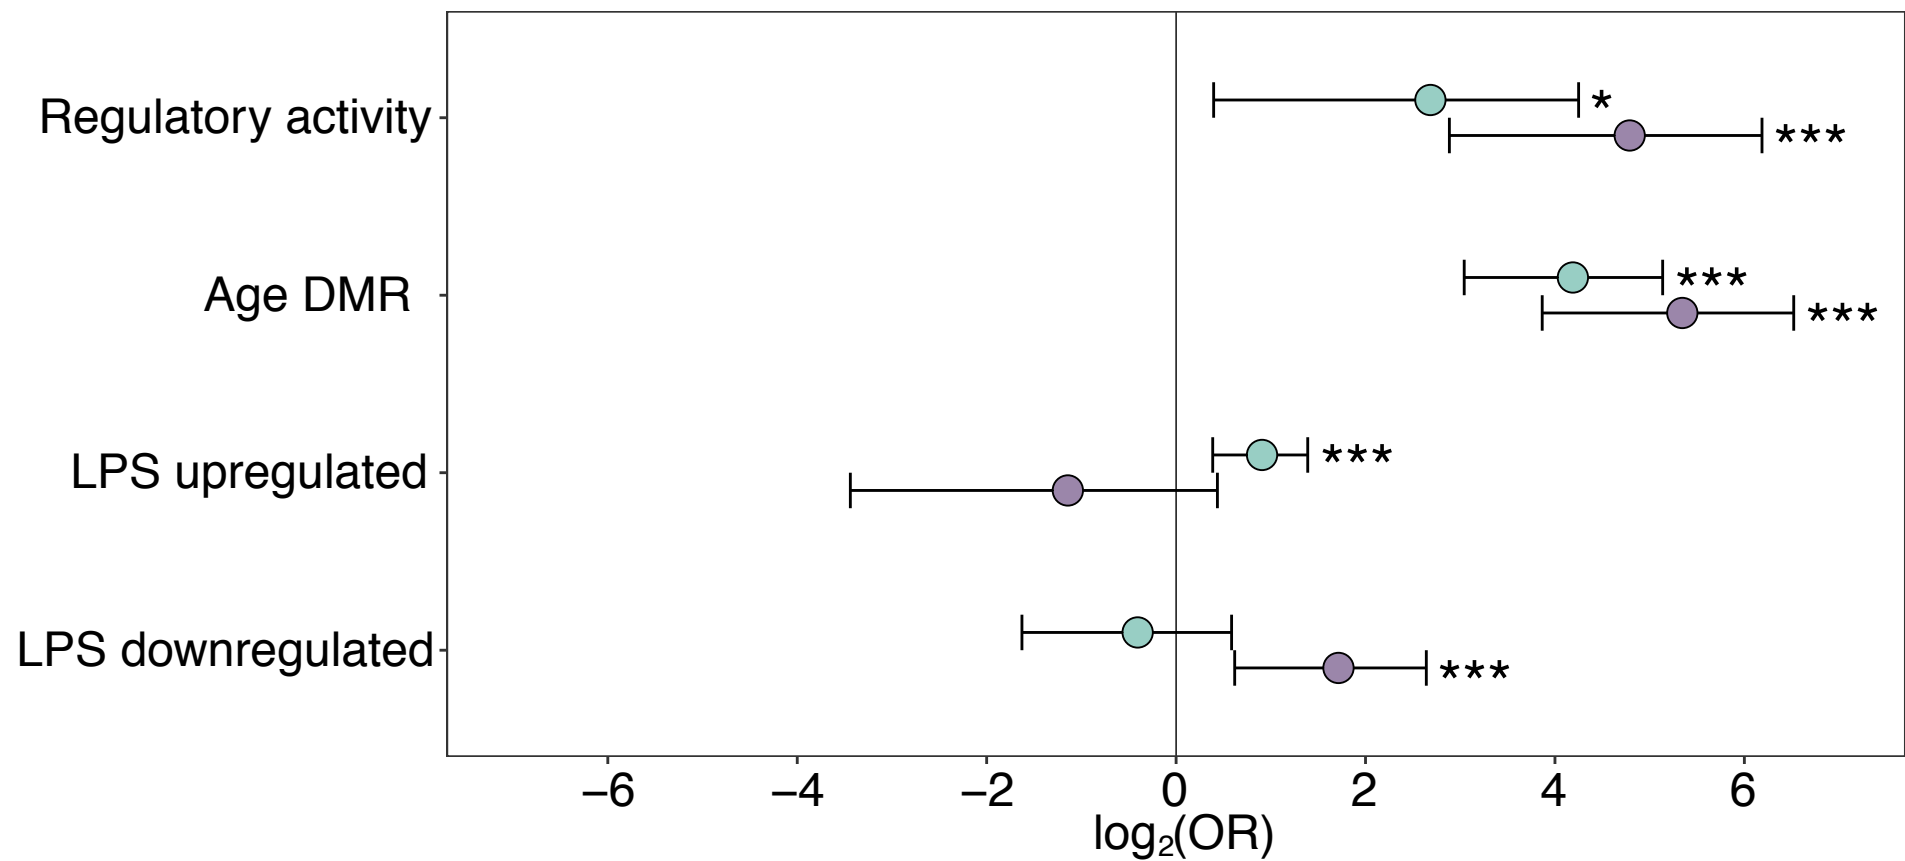

Supplement: supp [file elife-66128-supp-v1.zip › elife_poa_e66128_Figure_1_figure_supplement_3.pdf]

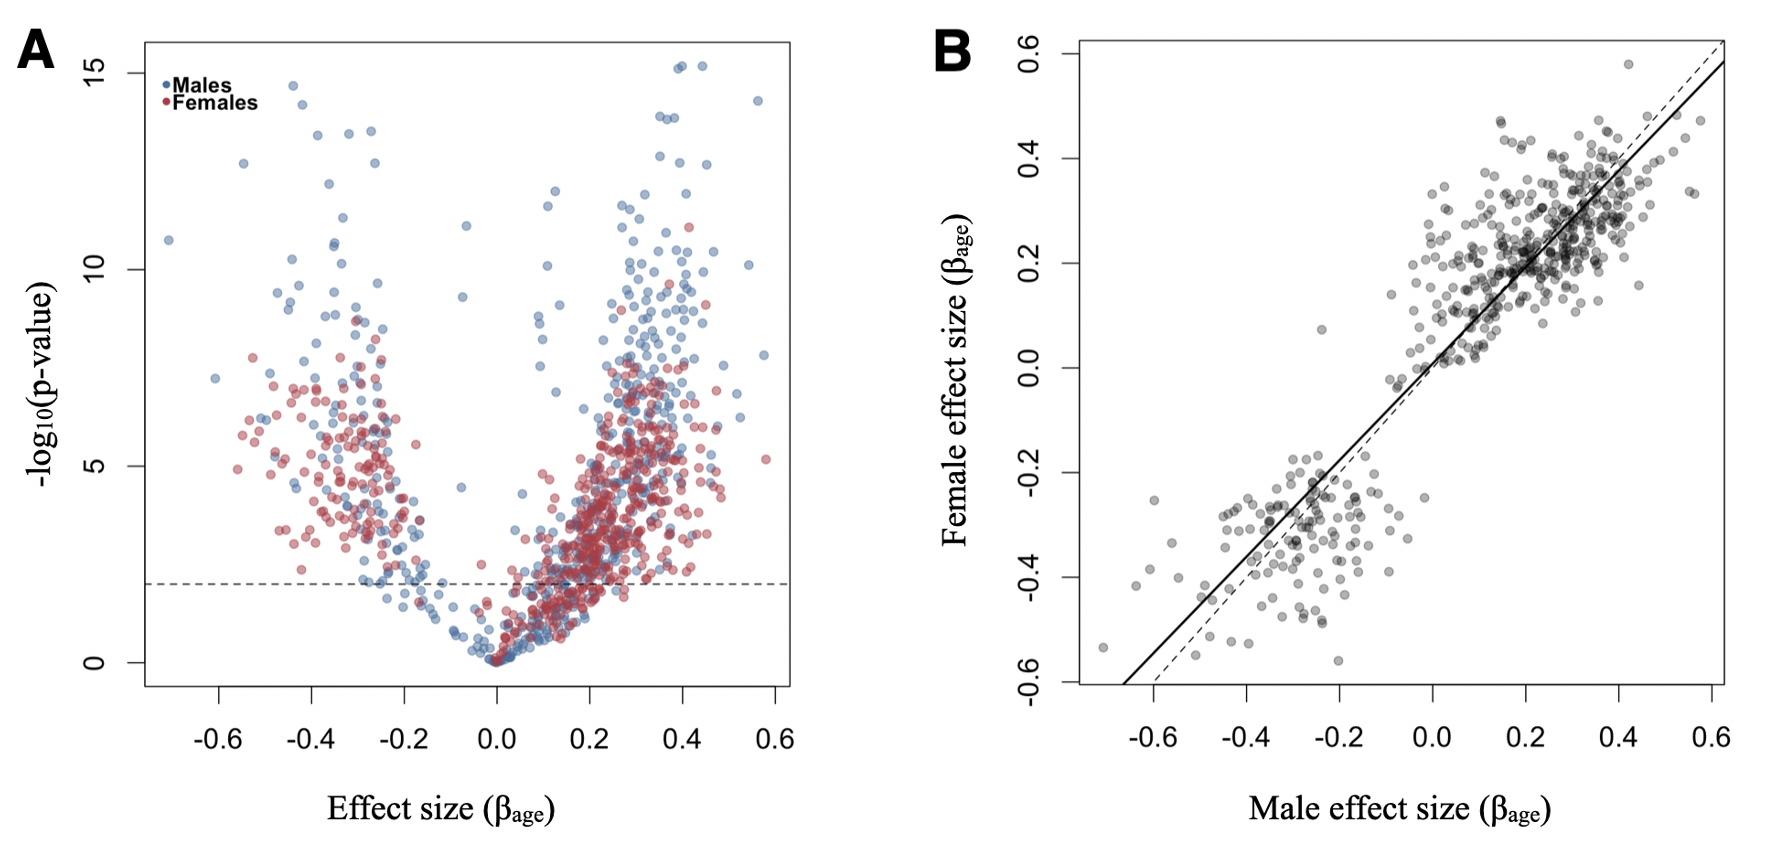

Supplement: supp [file elife-66128-supp-v1.zip › elife_poa_e66128_Figure_1_figure_supplement_4.png]

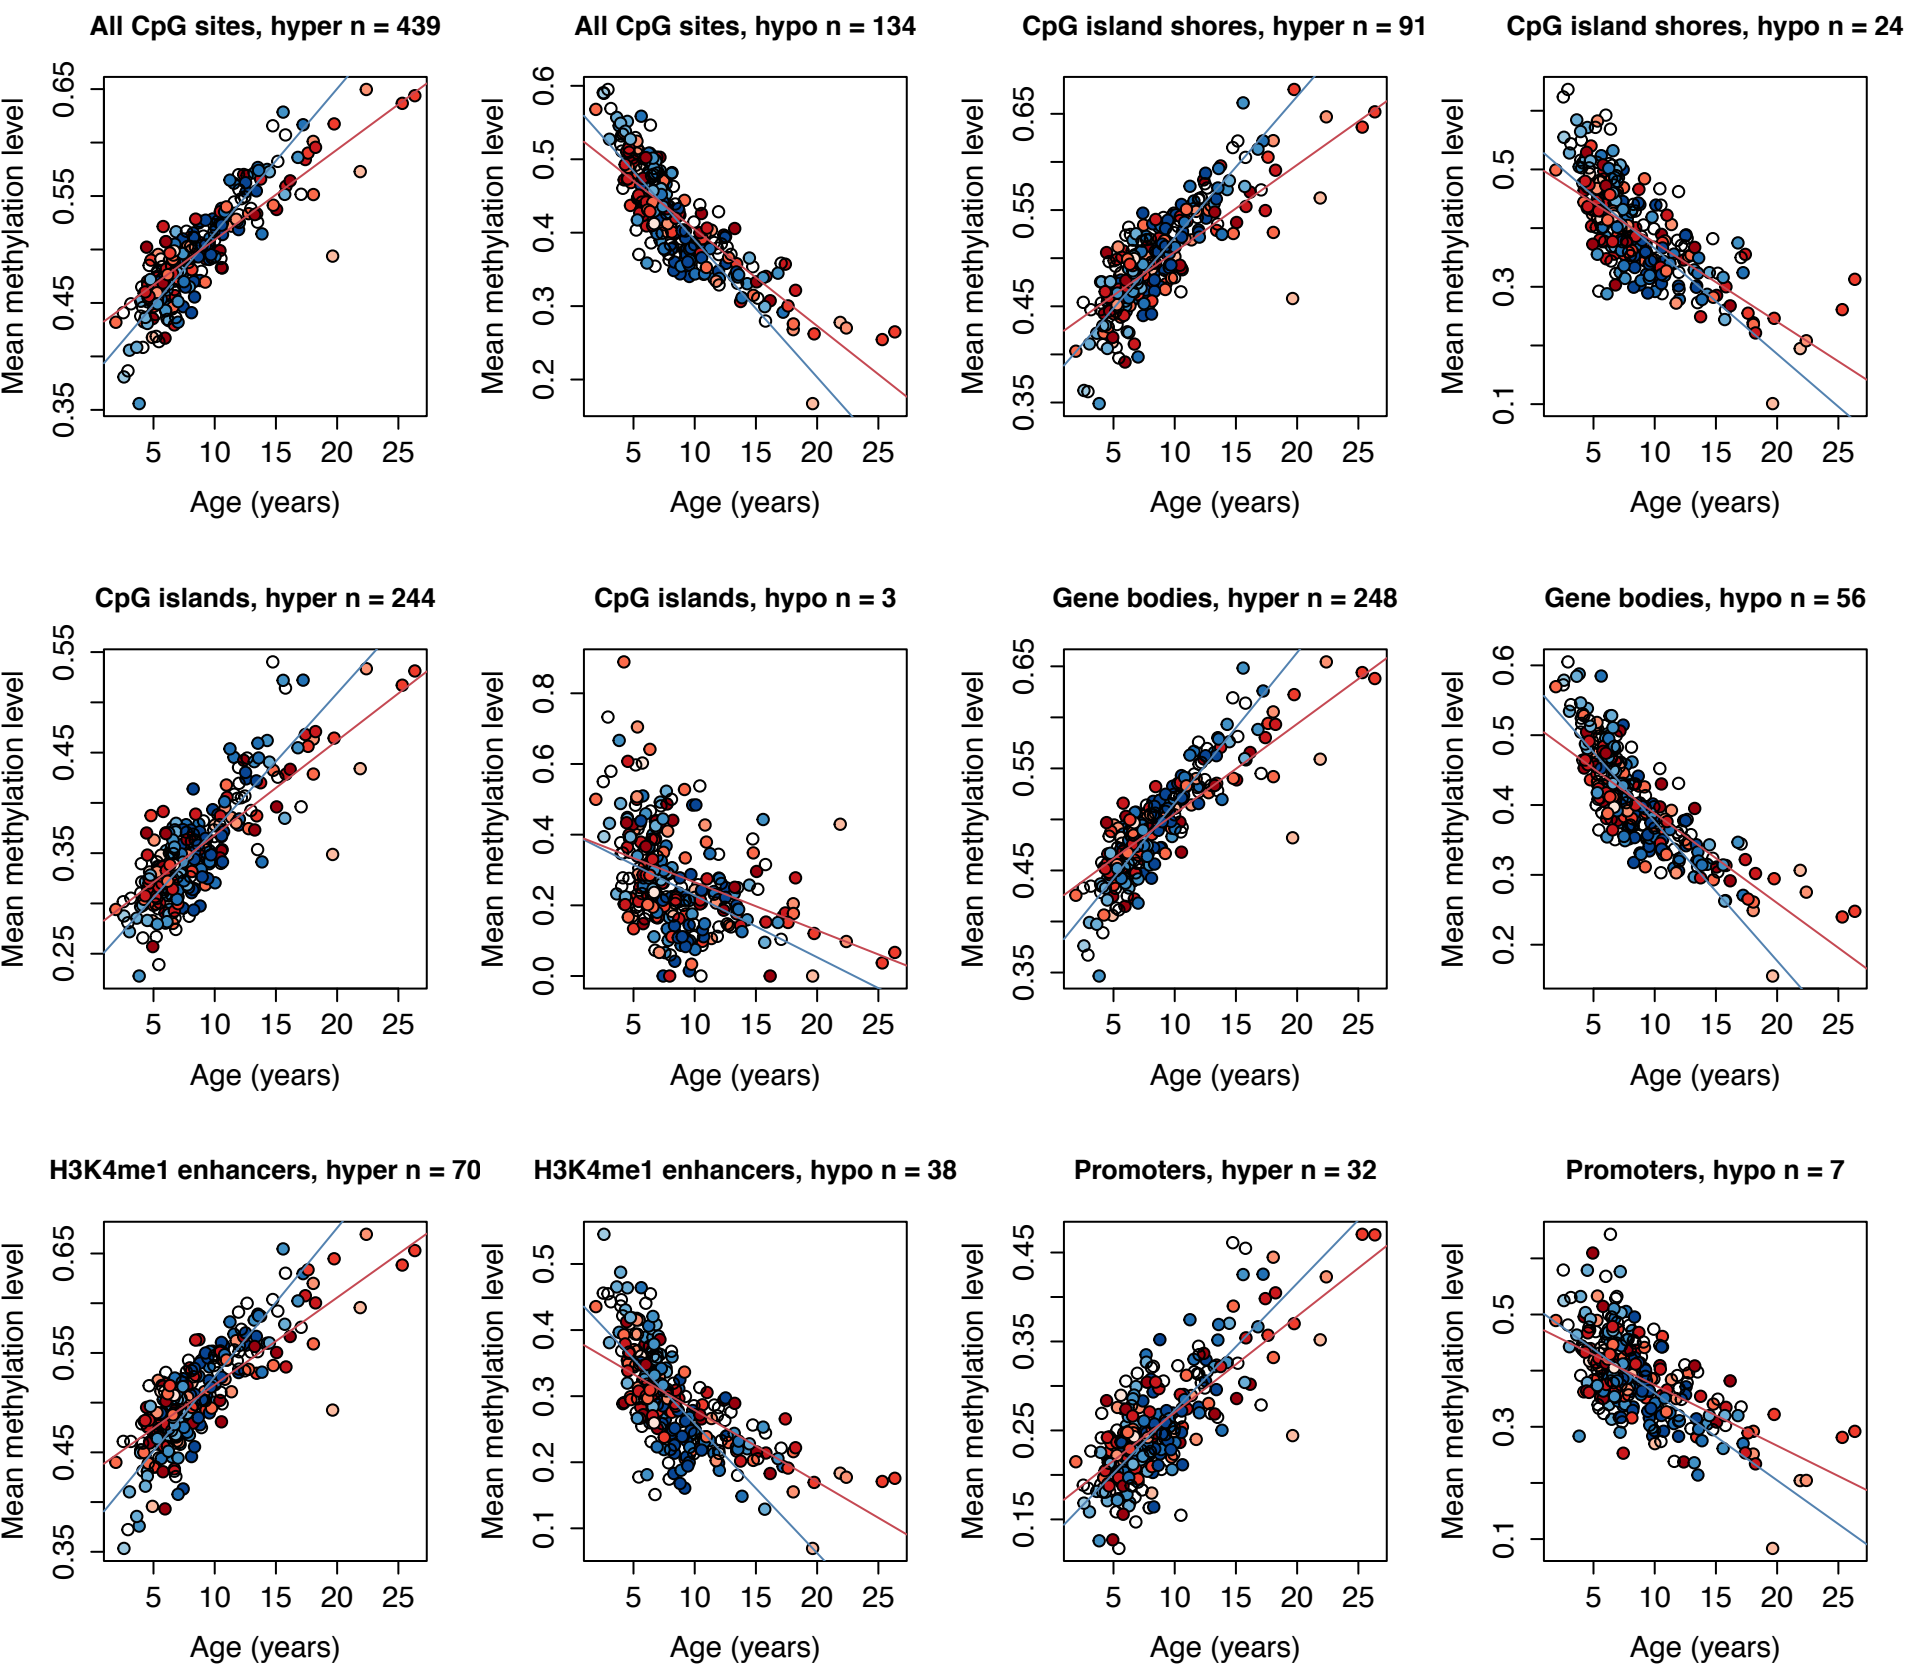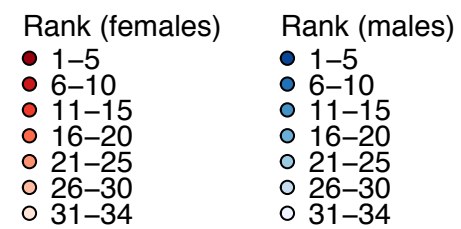

Supplement: supp [file elife-66128-supp-v1.zip › elife_poa_e66128_Figure_2_figure_supplement_1.pdf]

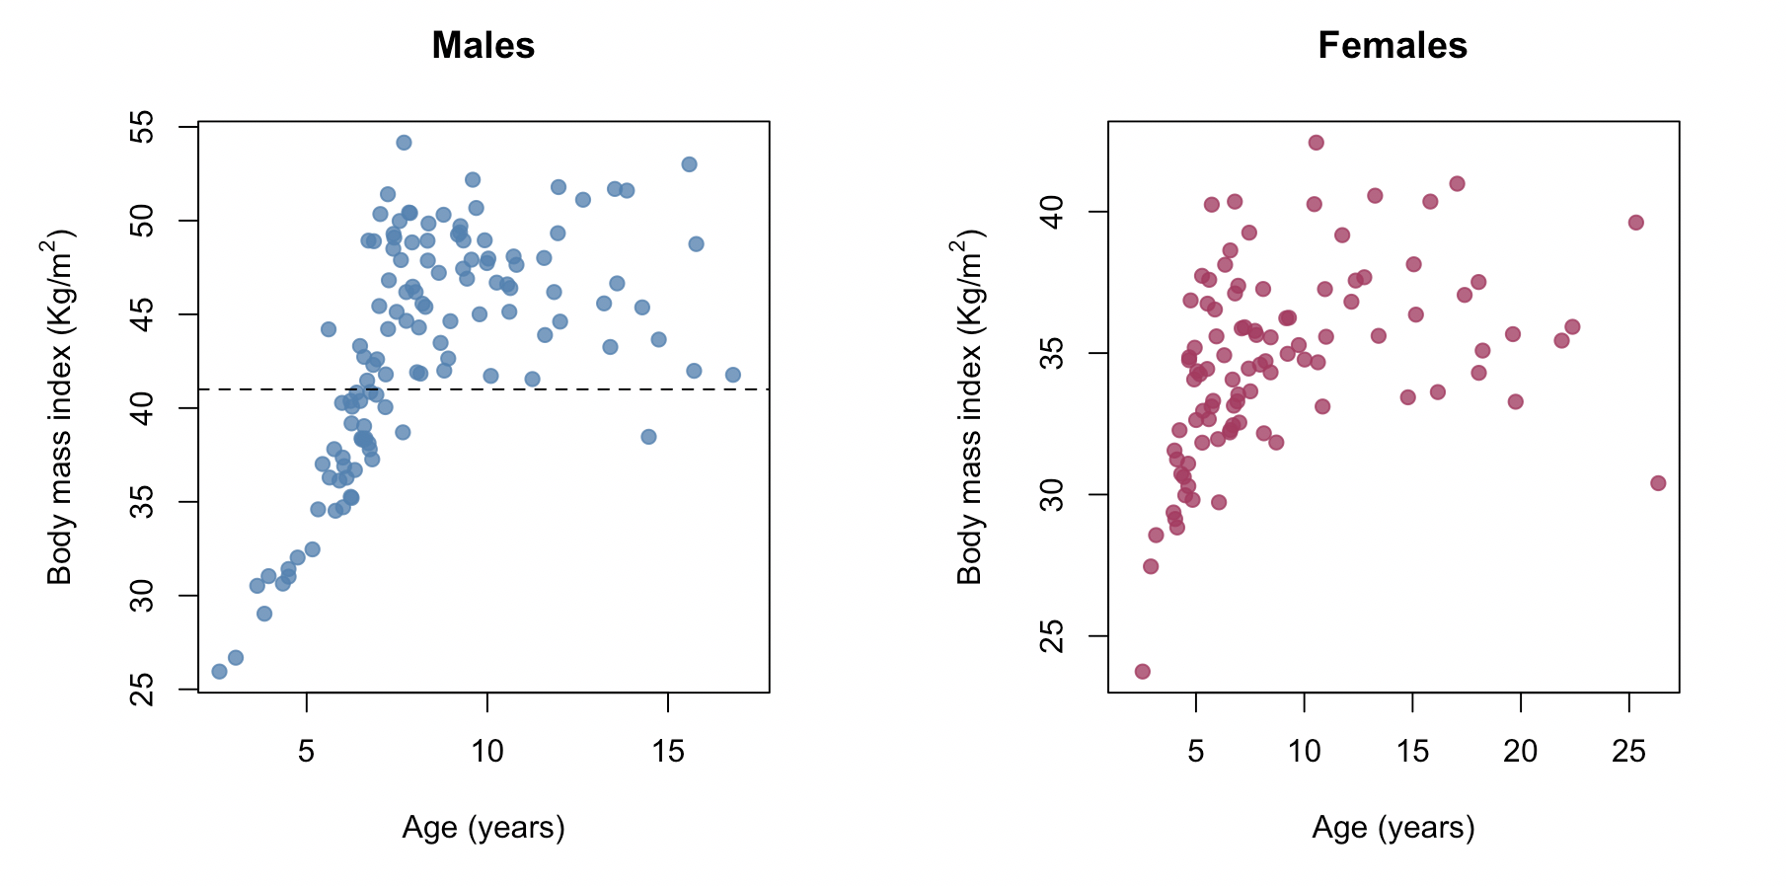

Supplement: supp [file elife-66128-supp-v1.zip › elife_poa_e66128_Figure_2_figure_supplement_2.png]

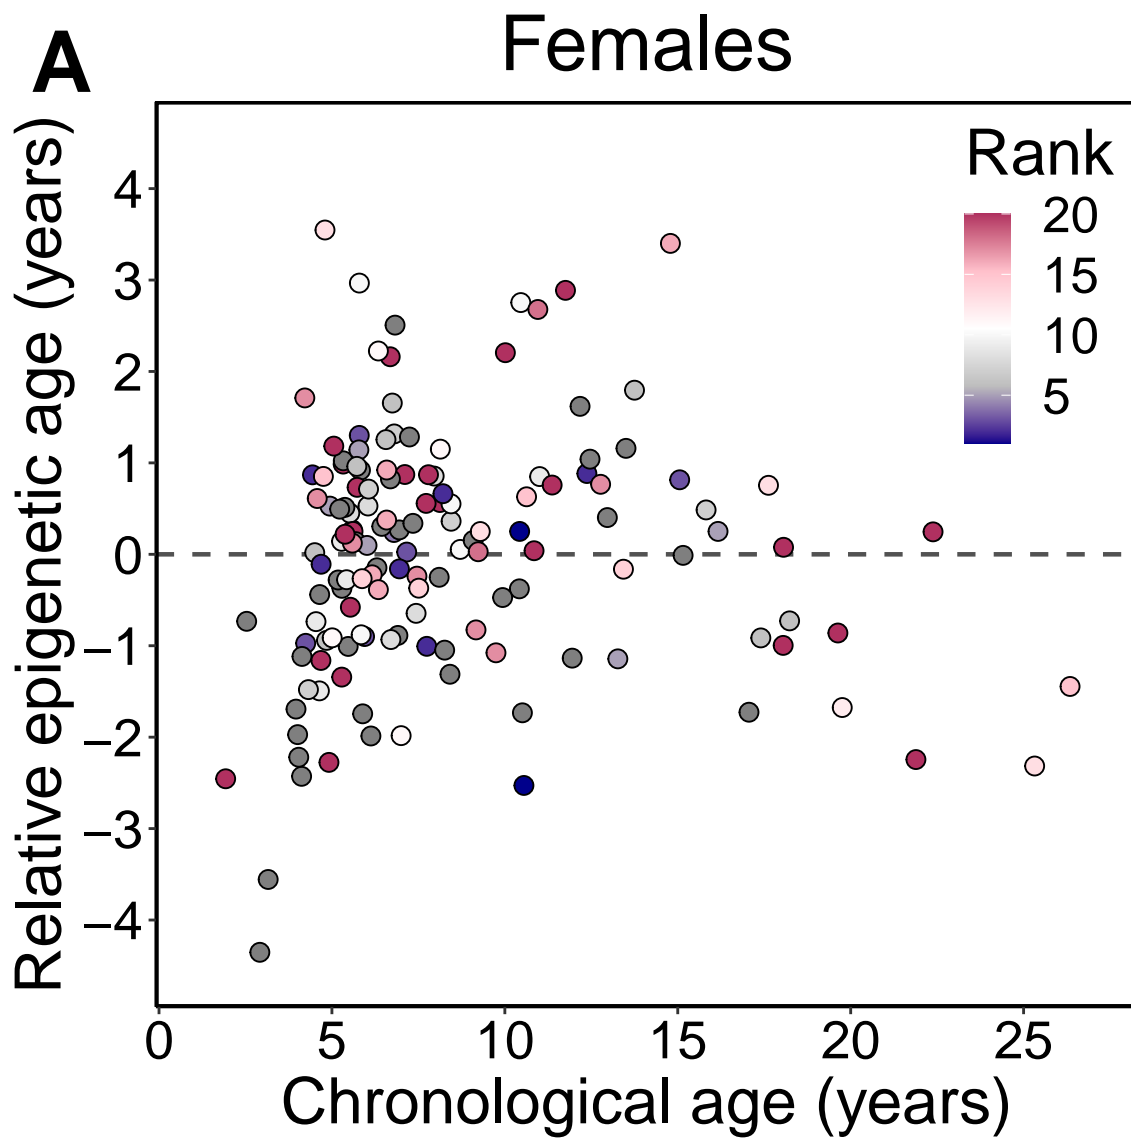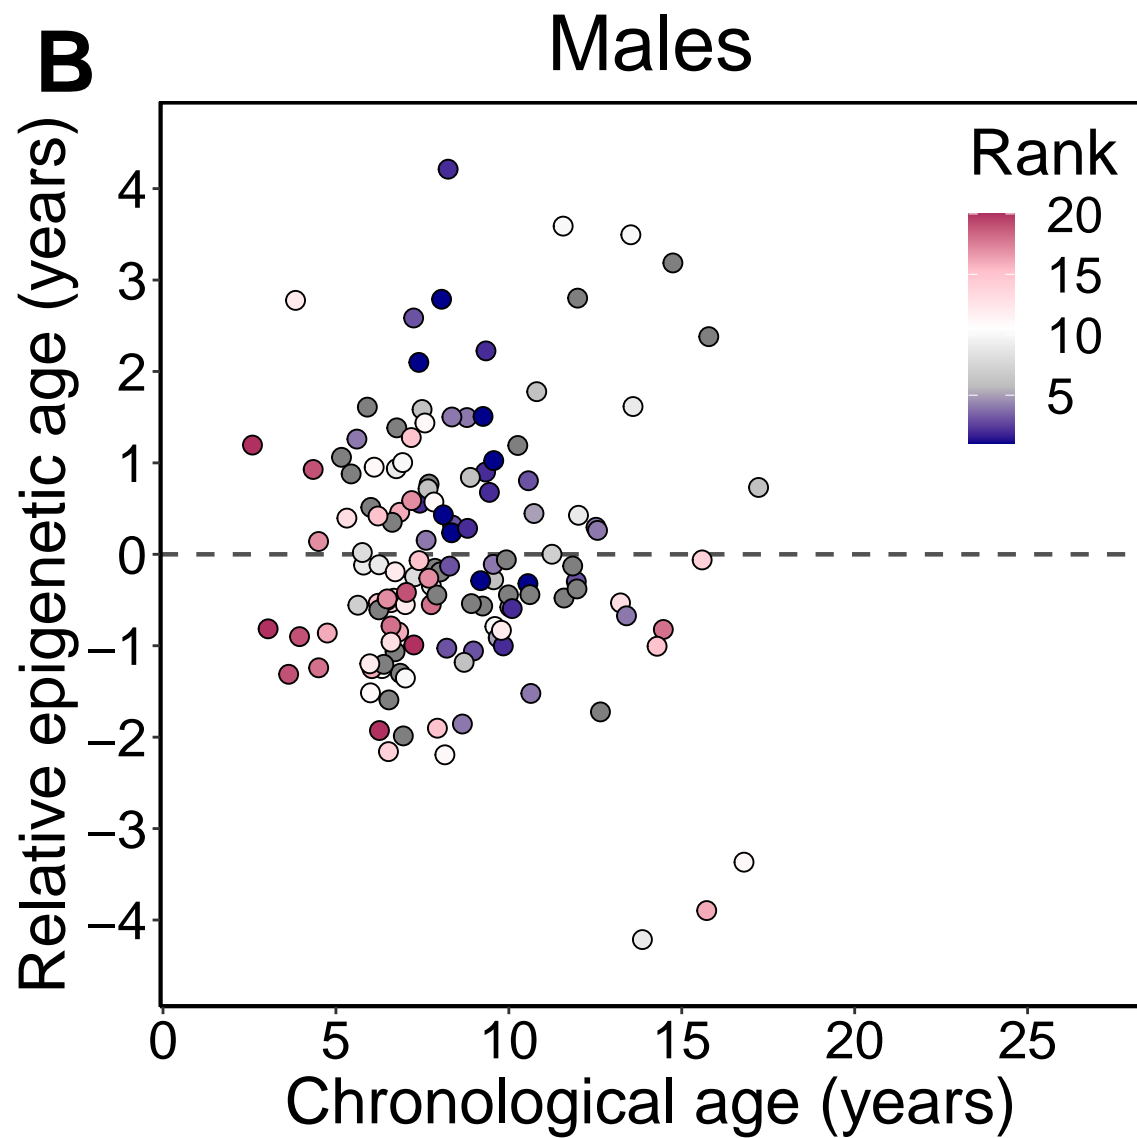

Supplement: supp [file elife-66128-supp-v1.zip › elife_poa_e66128_Figure_2_figure_supplement_3.pdf]

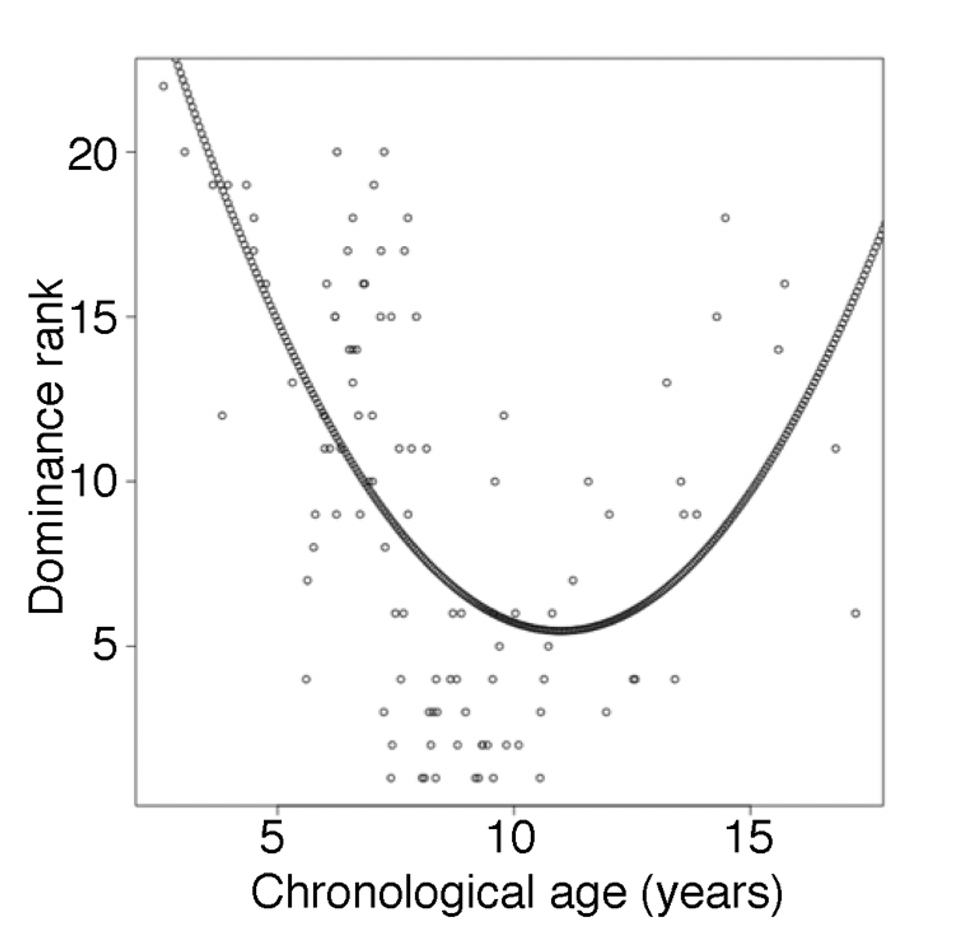

Supplement: supp [file elife-66128-supp-v1.zip › elife_poa_e66128_Figure_2_figure_supplement_4.png]
